# Supplementary material for: Design, synthesis, biological evaluation and QSAR analysis of novel N-substituted benzimidazole derived carboxamides
Source: PubMed Central journal article supplement (PMC9090388; doi:10.1080/14756366.2022.2070910), 2022-05-06
Supplement: IENZ_A_2070910_SM2546.pdf [file IENZ_A_2070910_SM2546.pdf]

**Synthesis, QSAR analysis and biological activity of novel *N*-substituted benzimidazole derived carboxamides as potential antioxidants with antiproliferative activity**

Anja Beč<sup>1</sup>, Marija Mioč<sup>2</sup>, Branimir Bertoša<sup>3</sup>, Marija Kos<sup>1</sup>, Patricia Debogović<sup>1</sup>, Marijeta Kralj<sup>2</sup>,  
Kristina Starčević<sup>4\*</sup> and Marijana Hranjec<sup>1\*</sup>

**Content:**

1. **Figure S1:** Predicted *vs* experimental antioxidative activity expressed as pIC<sub>50</sub> – negative logarithmic value of concentration that causes 50% of antioxidative activity measured: A) using DPPH test (model 1) and B) using FRAP test (model 2).
2. **Figure S2:** PCA loadings plot. Molecular descriptors with the highest contributions to the first two principal components are labelled. The first two principal components explained 91 % of variance of the descriptors (X-matrix).
3. **Figure S3.** Impact of compounds on cellular ROS production was measured with fluorescent dye DCF-DA in HCT116 cell line, after the treatment with 10µM compounds for 1h.
4. **Figures S3-S85:** NMR spectra of synthesized compounds

A)

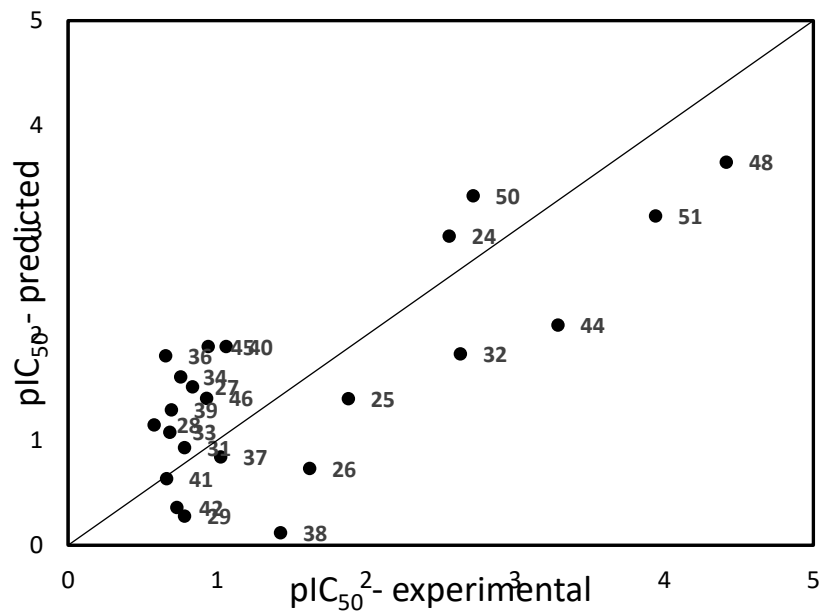

B)

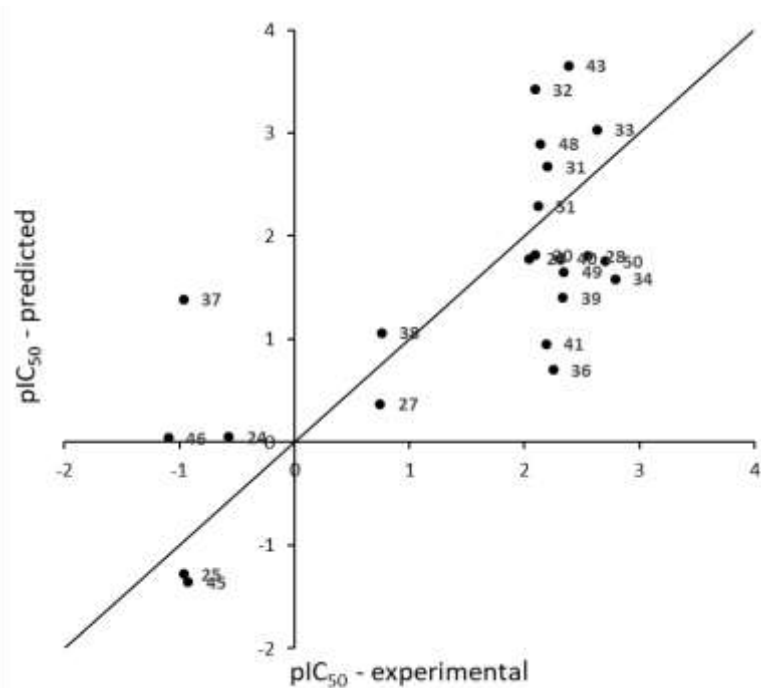

**Figure S1.** Predicted vs experimental antioxidative activity expressed as  $pIC_{50}$  – negative logarithmic value of concentration that causes 50% of antioxidative activity measured: A) using DPPH test (model 1) and B) using FRAP test (model 2).

A)

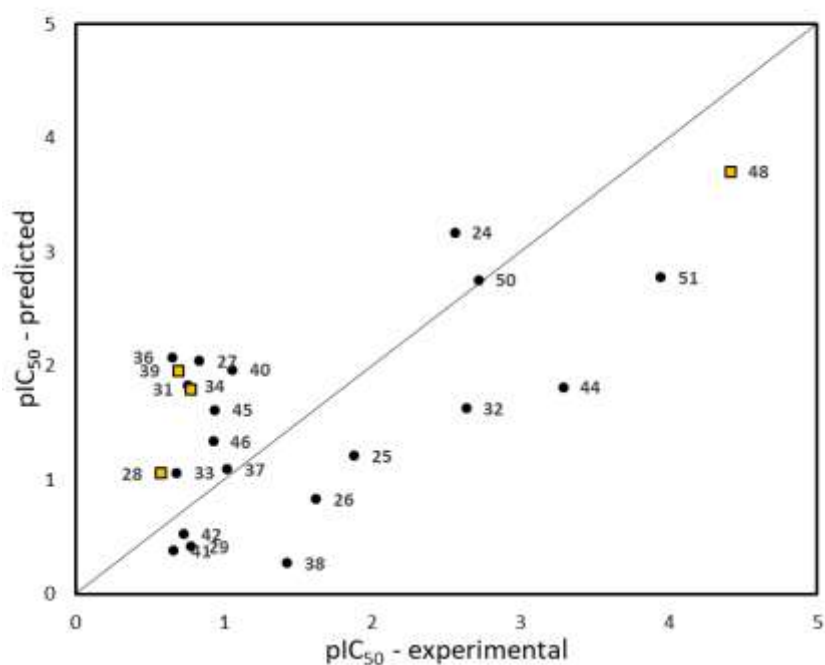

B)

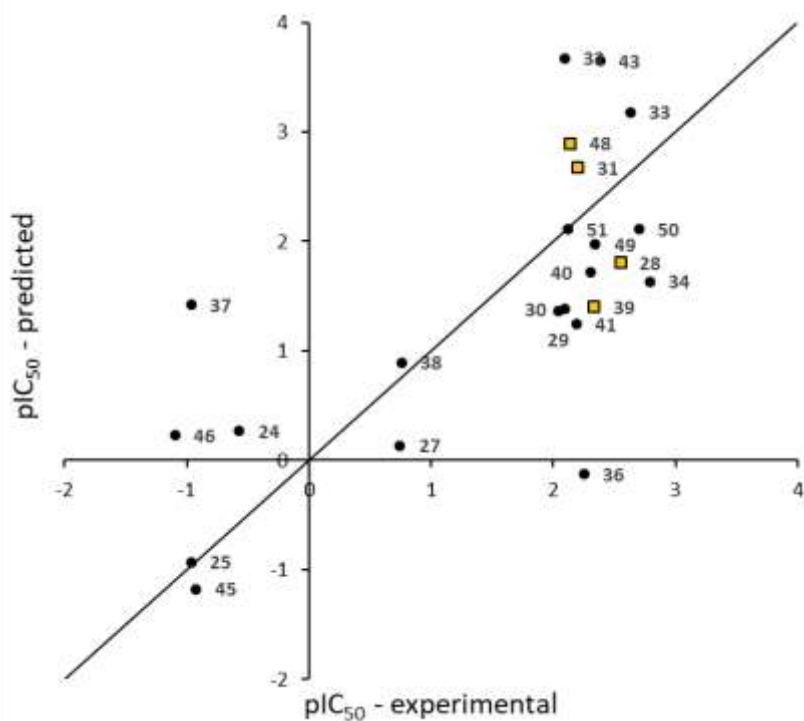

**Figure S2.** External predictions of the model obtained using: A) DPPH test and B) using FRAP test. Test set compounds: 28, 31, 39, and 48 are marked as yellow squares. Training set consisted of the remaining compounds of the dataset used to generate the model.

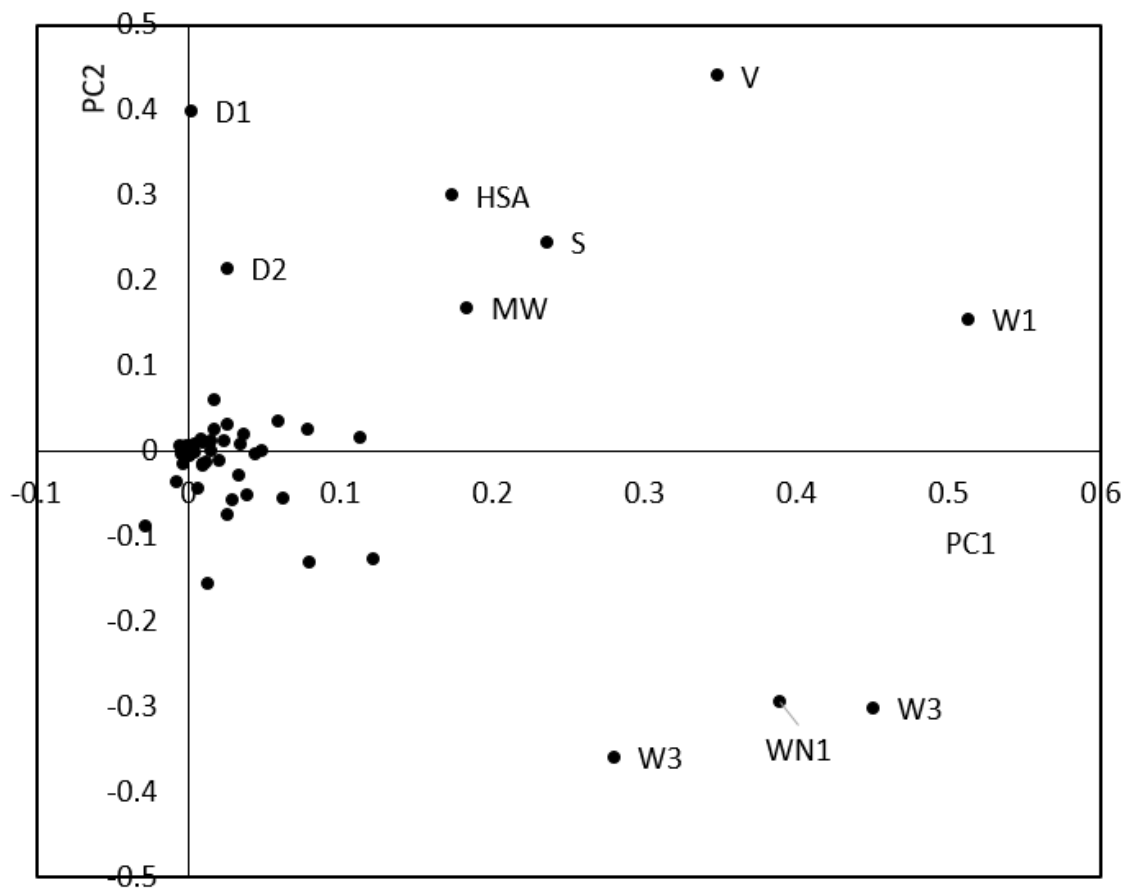

**Figure S3.** PCA loadings plot. Molecular descriptors with the highest contributions to the first two principal components are labelled. The first two principal components explained 91 % of variance of the descriptors (X-matrix).

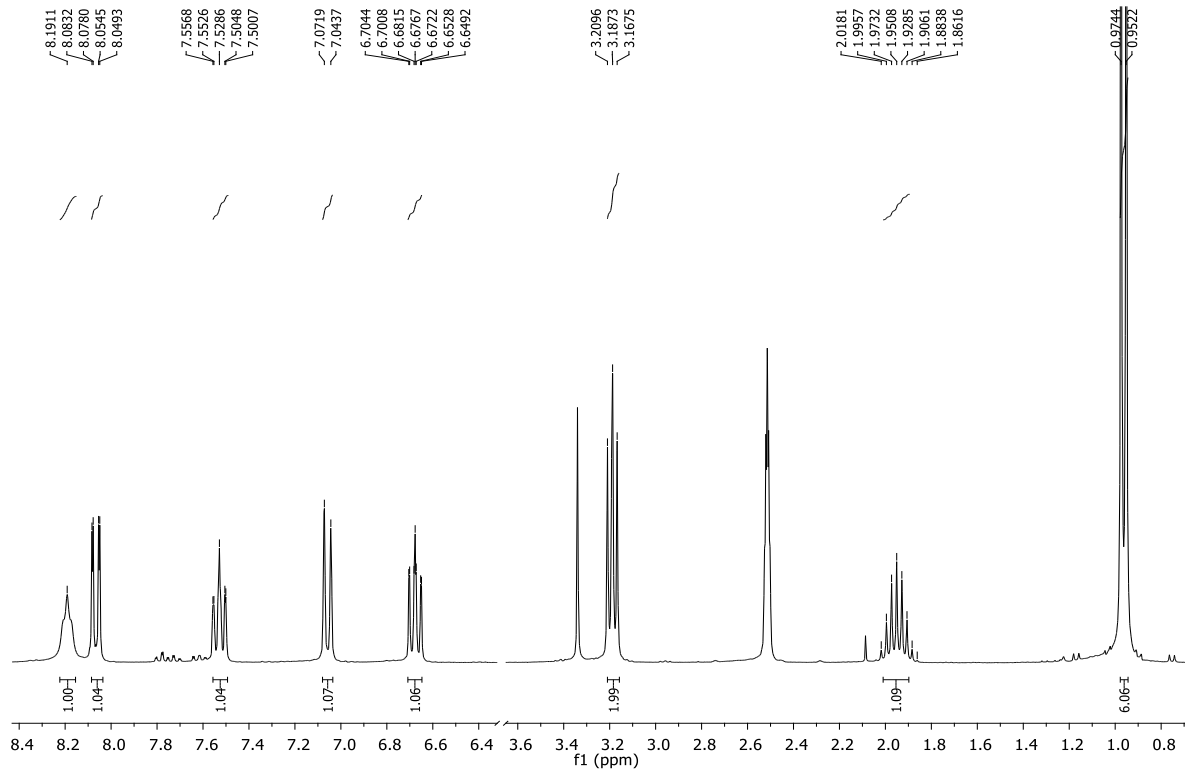

**Figure S4.**  $^1\text{H}$  NMR spectrum (DMSO- $d_6$ , 300 MHz) of *N*-isobutyl-2-nitroaniline **3**

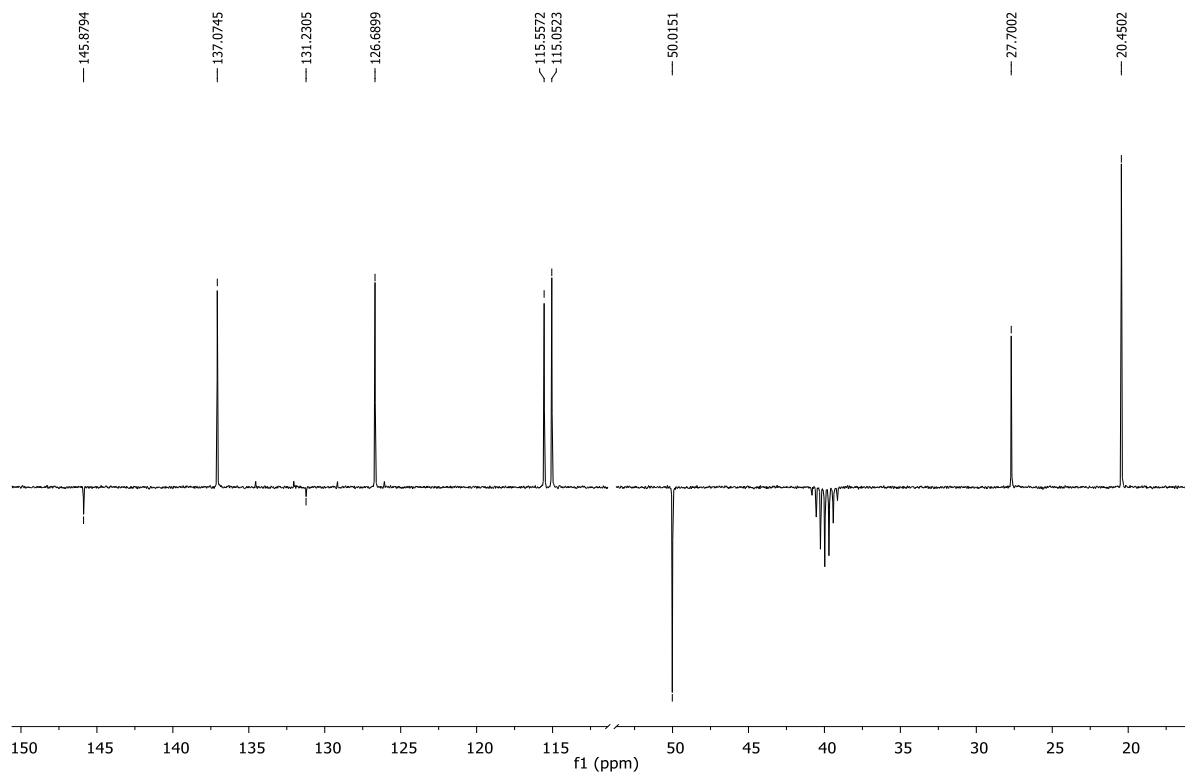

**Figure S5.**  $^{13}\text{C}$  NMR spectrum (DMSO- $d_6$ , 75 MHz) of *N*-isobutyl-2-nitroaniline **3**

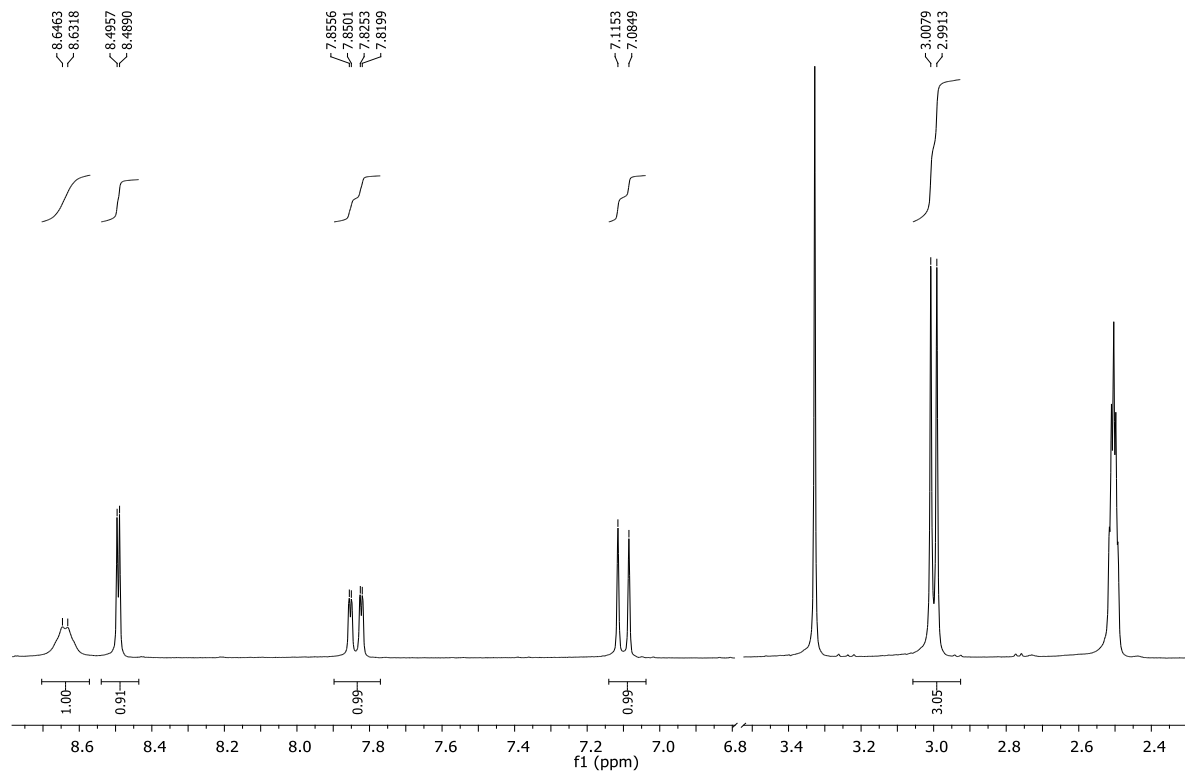

**Figure S6.**  $^1\text{H}$  NMR spectrum (DMSO- $d_6$ , 300 MHz) of 3-*N*-(methylamino)-4-nitrobenzonitrile **4**

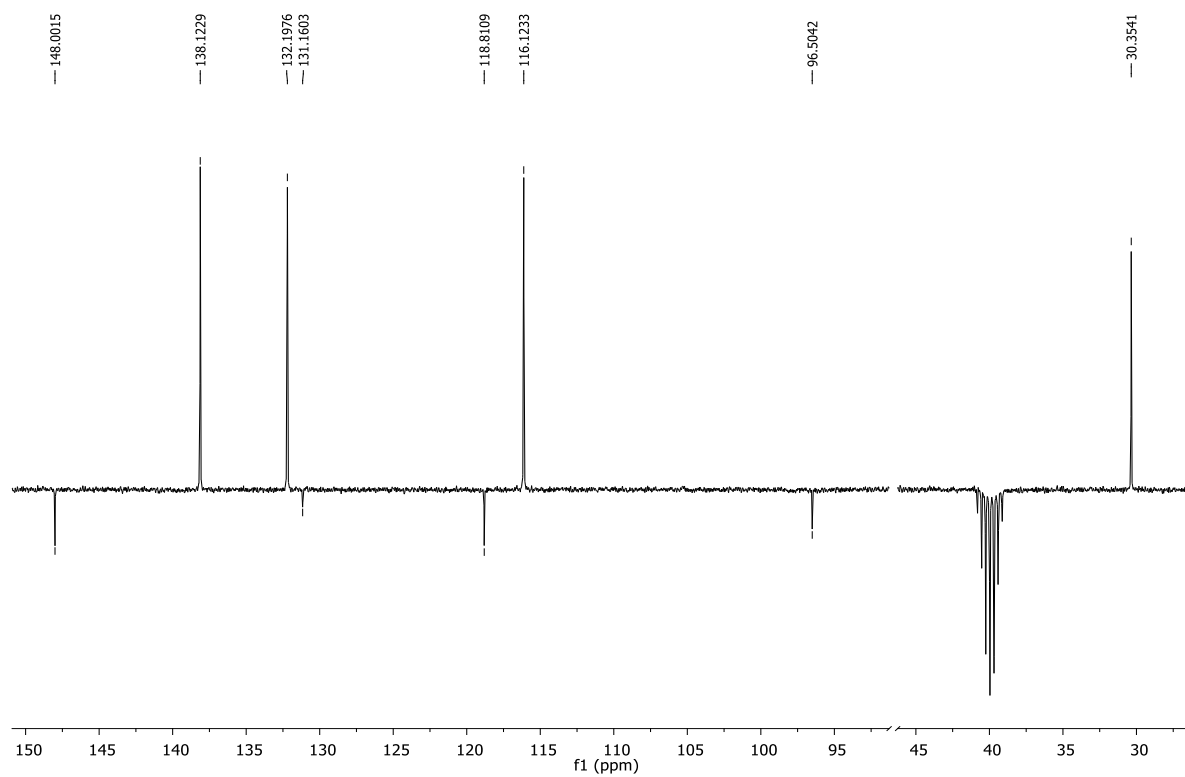

**Figure S7.**  $^{13}\text{C}$  NMR spectrum (DMSO- $d_6$ , 75 MHz) of 3-*N*-(methylamino)-4-nitrobenzonitrile **4**

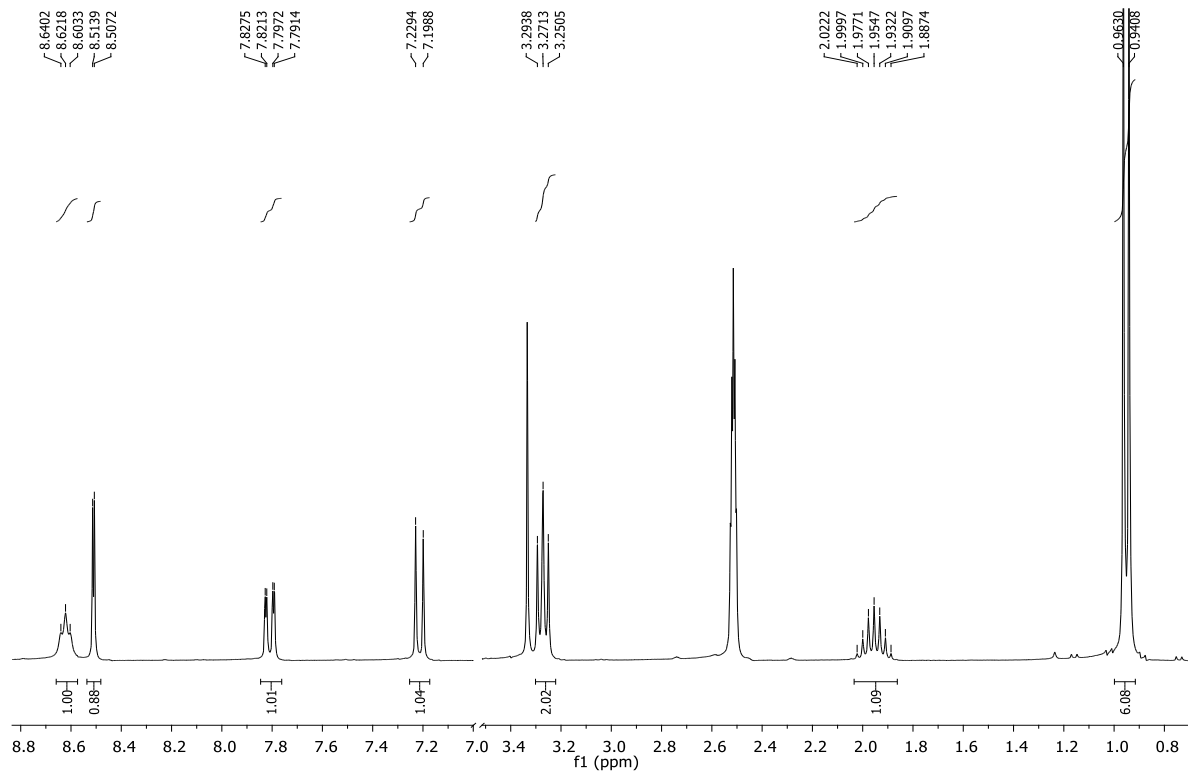

**Figure S8.**  $^1\text{H}$  NMR spectrum (DMSO- $d_6$ , 300 MHz) of *3-N-(isobutylamino)-4-nitrobenzonitrile* **5**

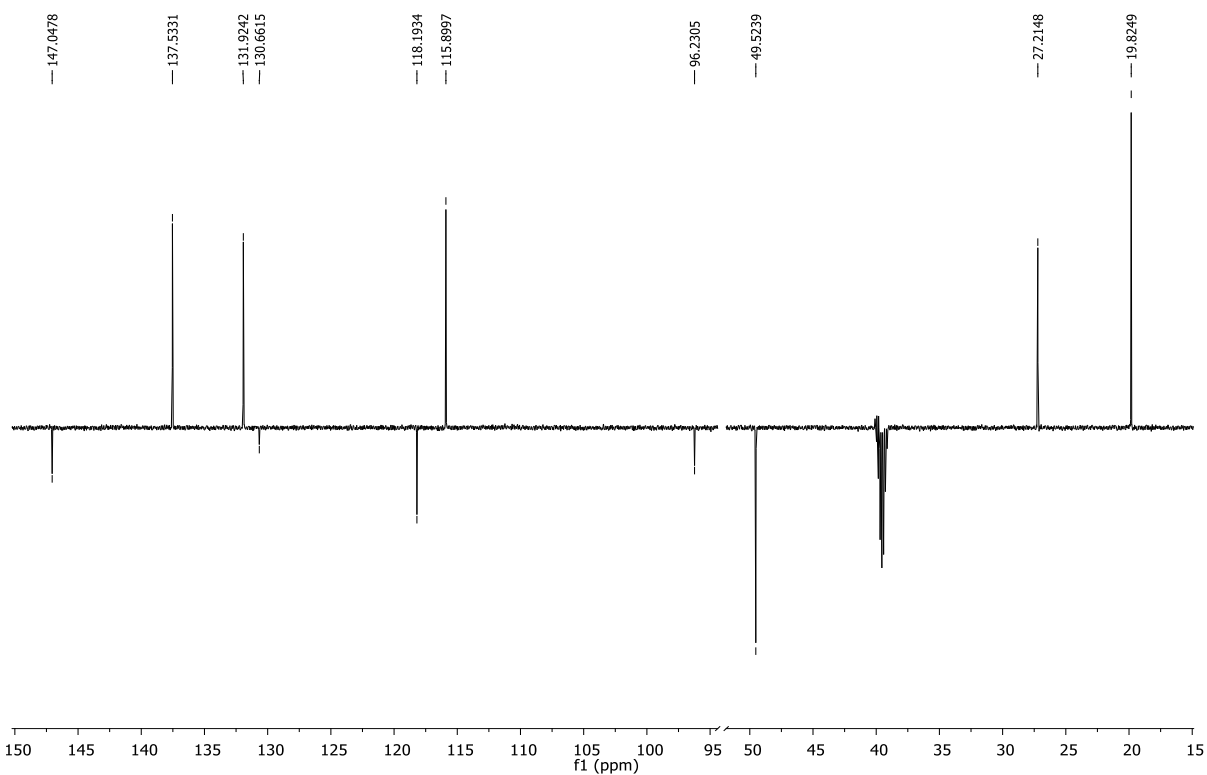

**Figure S9.**  $^{13}\text{C}$  NMR spectrum (DMSO- $d_6$ , 151 MHz) of *3-N-(isobutylamino)-4-nitrobenzonitrile* **5**

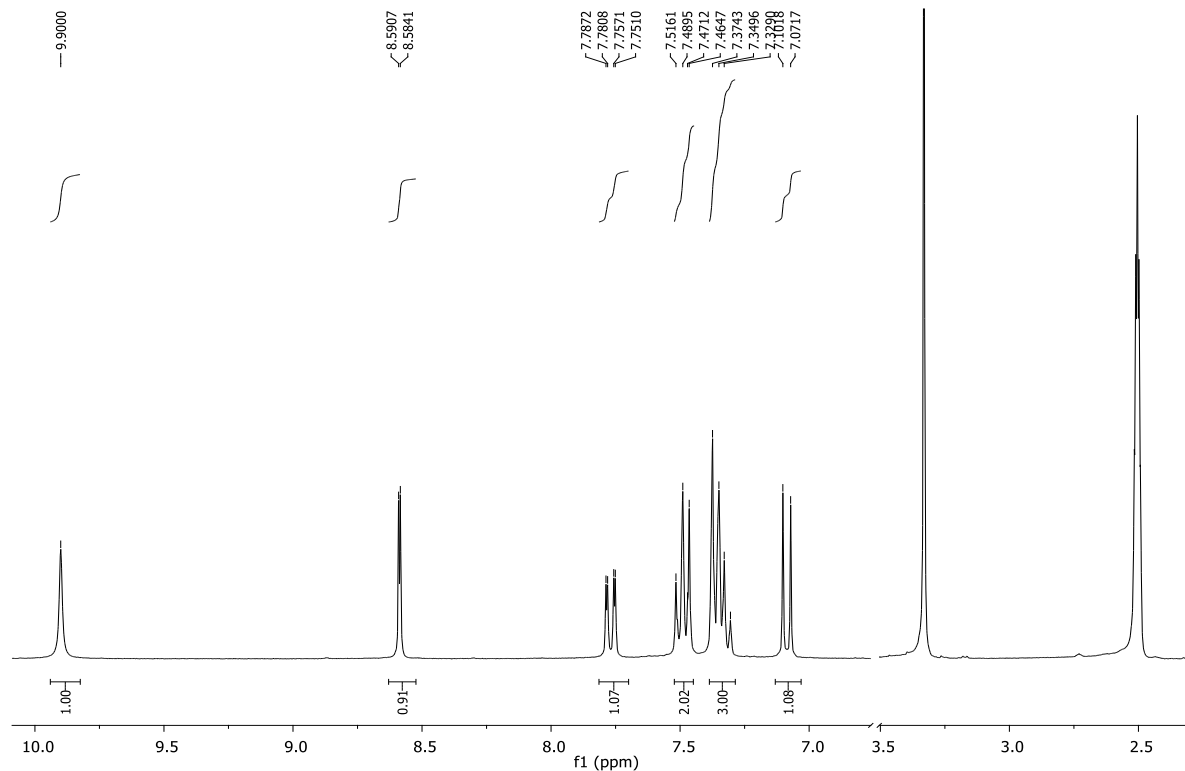

**Figure S10.**  $^1\text{H}$  NMR spectrum (DMSO- $d_6$ , 300 MHz) of 4-nitro-3-N-(phenylamino)benzotrile **6**

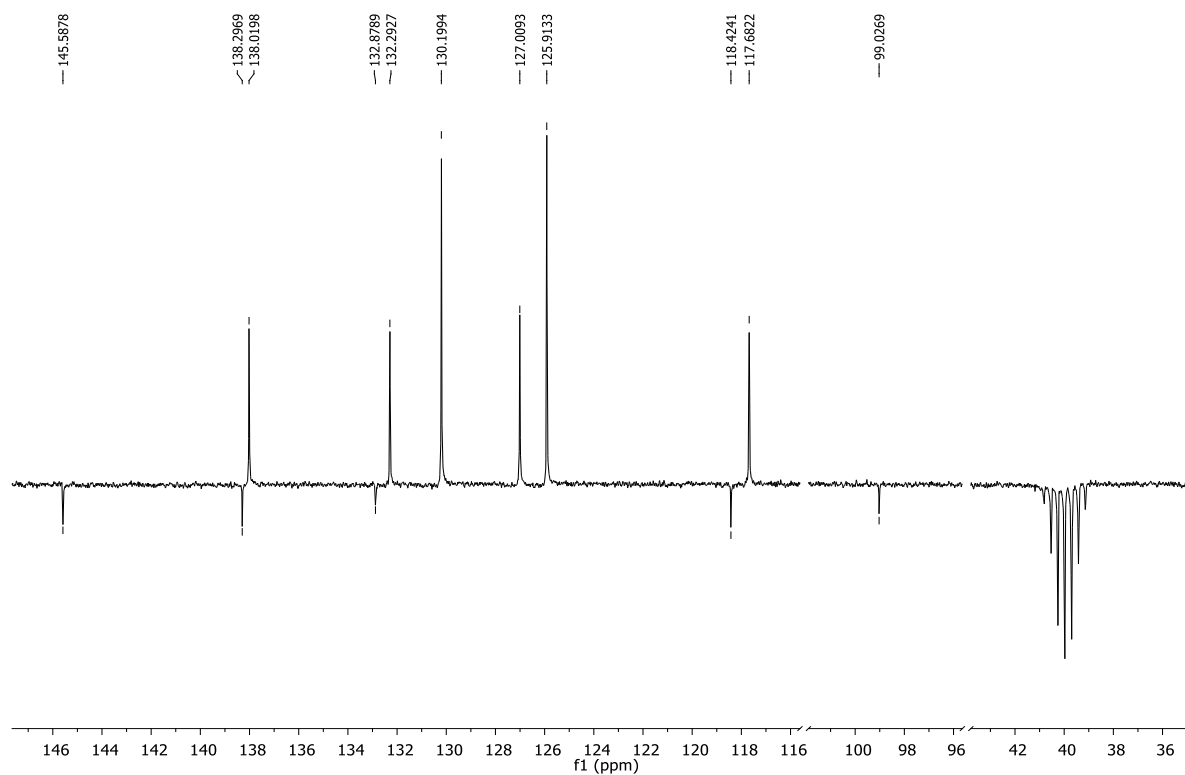

**Figure S11.**  $^{13}\text{C}$  NMR spectrum (DMSO- $d_6$ , 75 MHz) of 4-nitro-3-N-(phenylamino)benzotrile **6**



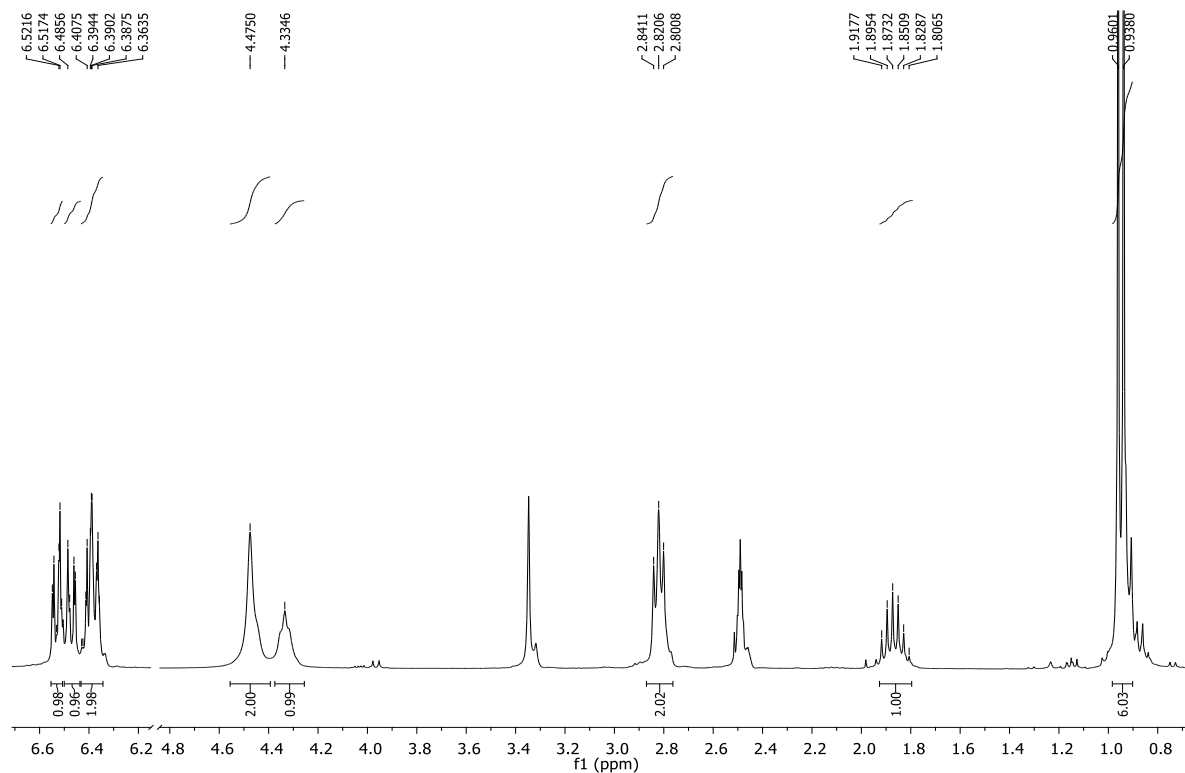

**Figure S12.**  $^1\text{H}$  NMR spectrum (DMSO- $d_6$ , 300 MHz) of *N*-isobutylbenzene-1,2-diamine **7**

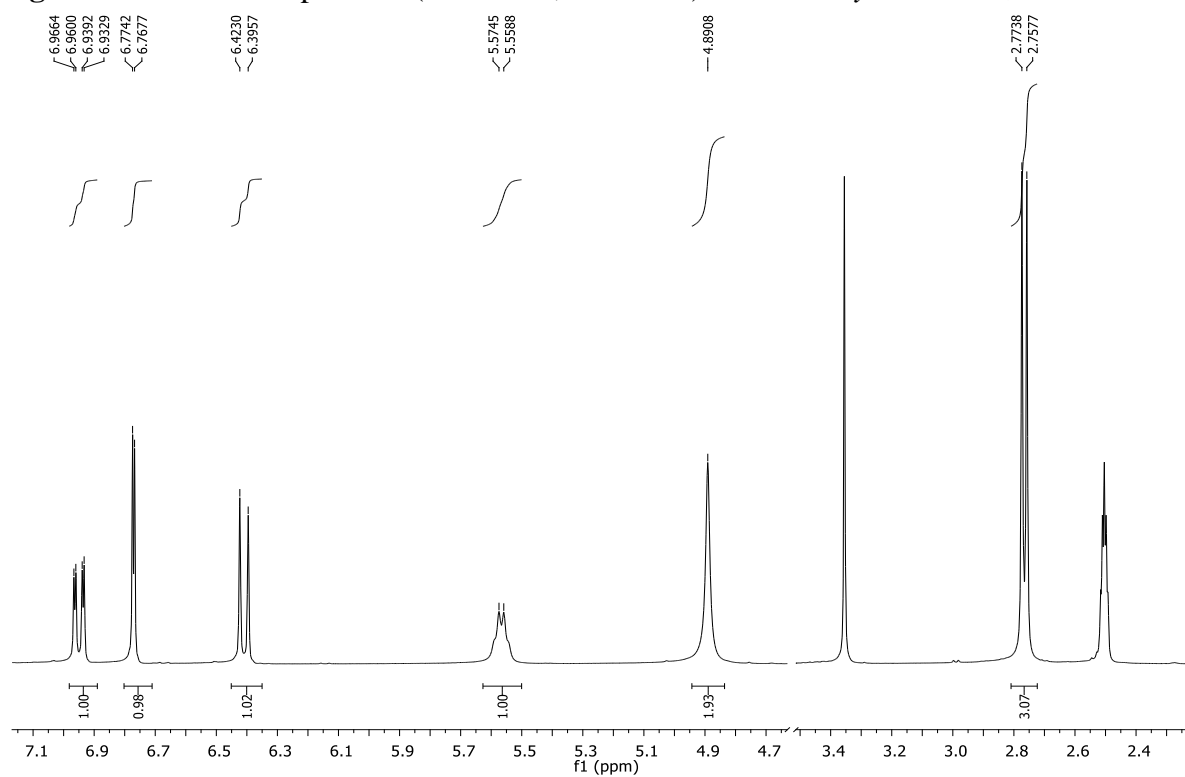

**Figure S13.**  $^1\text{H}$  NMR spectrum (DMSO- $d_6$ , 300 MHz) of 4-amino-3-(methylamino)benzonitrile

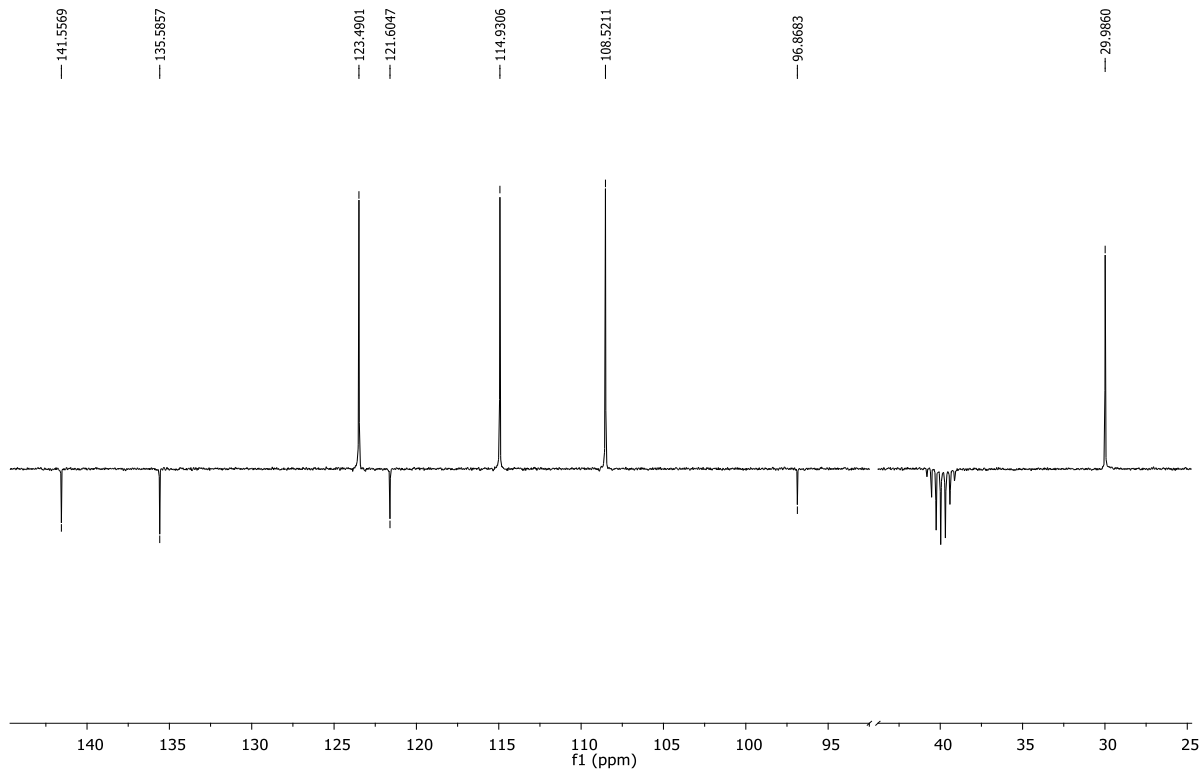

**Figure S14.**  $^{13}\text{C}$  NMR spectrum (DMSO- $d_6$ , 75 MHz) of 4-amino-3-(methylamino)benzonitrile **8**

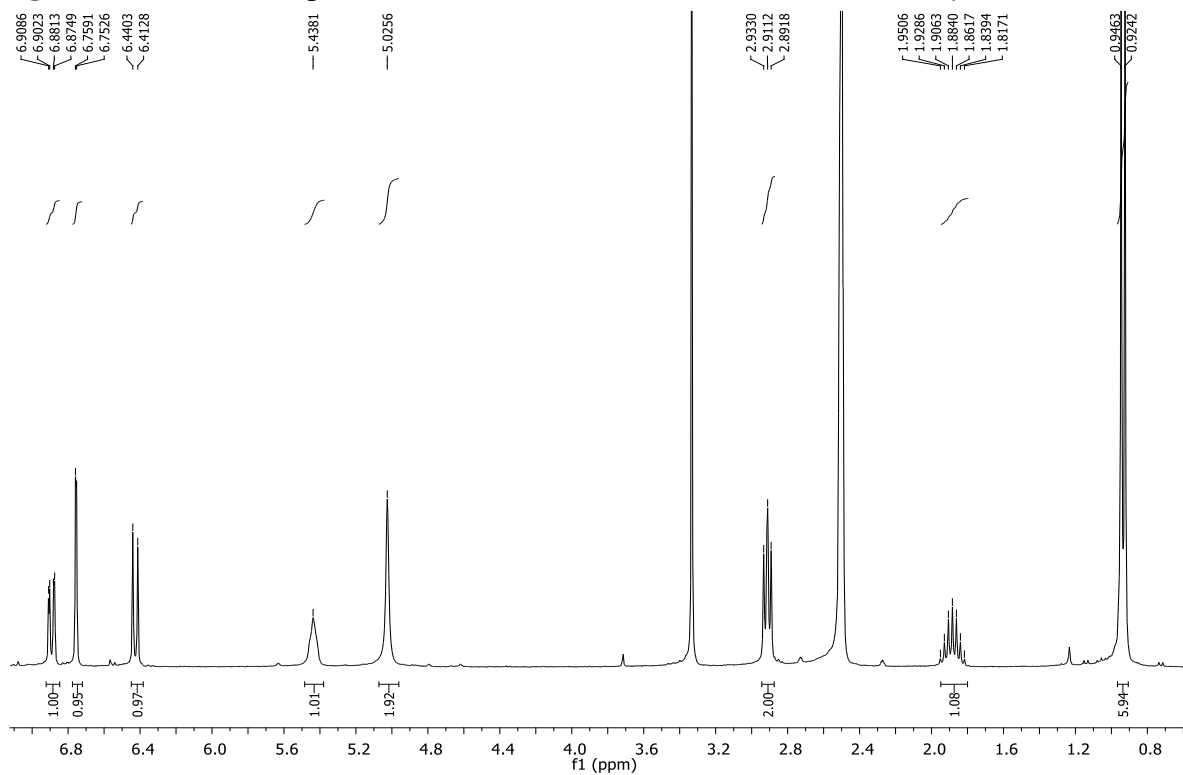

**Figure S15.**  $^1\text{H}$  NMR spectrum (DMSO- $d_6$ , 300 MHz) of 4-amino-3-(isobutylamino)benzonitrile **9**

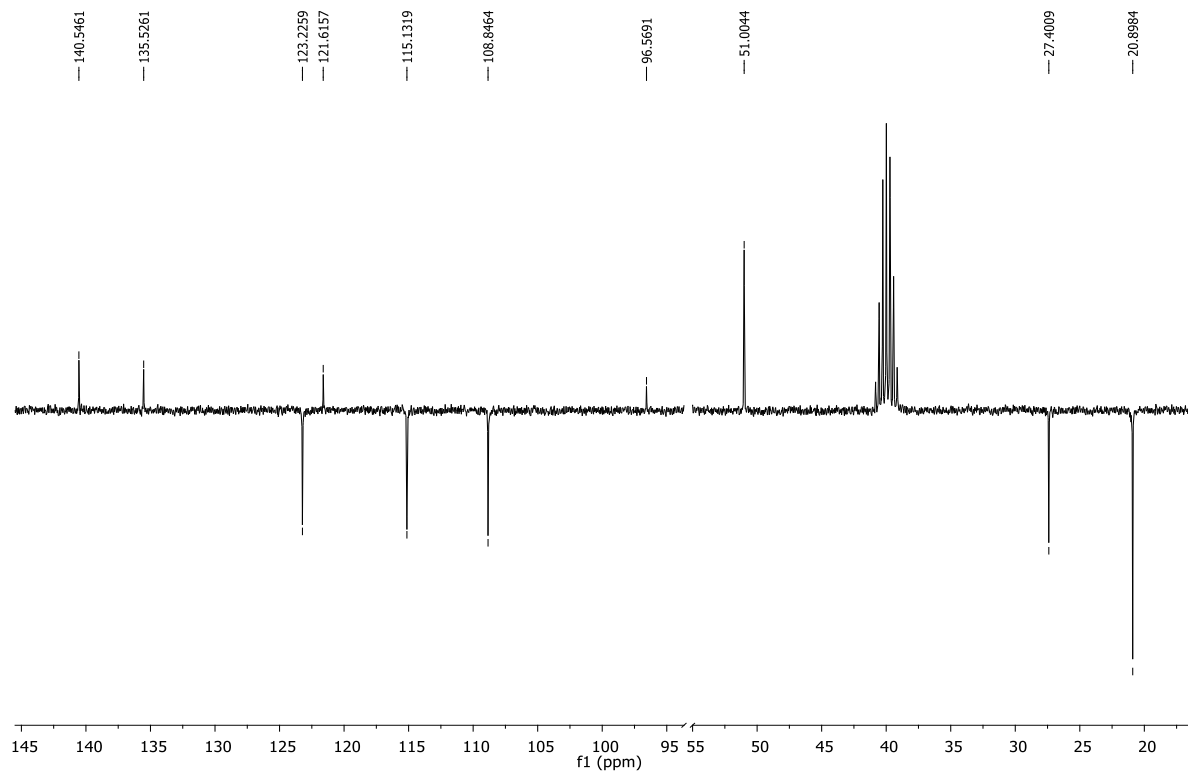

**Figure S16.**  $^{13}\text{C}$  NMR spectrum (DMSO- $d_6$ , 75 MHz) of 4-amino-3-(isobutylamino)benzonitrile **9**

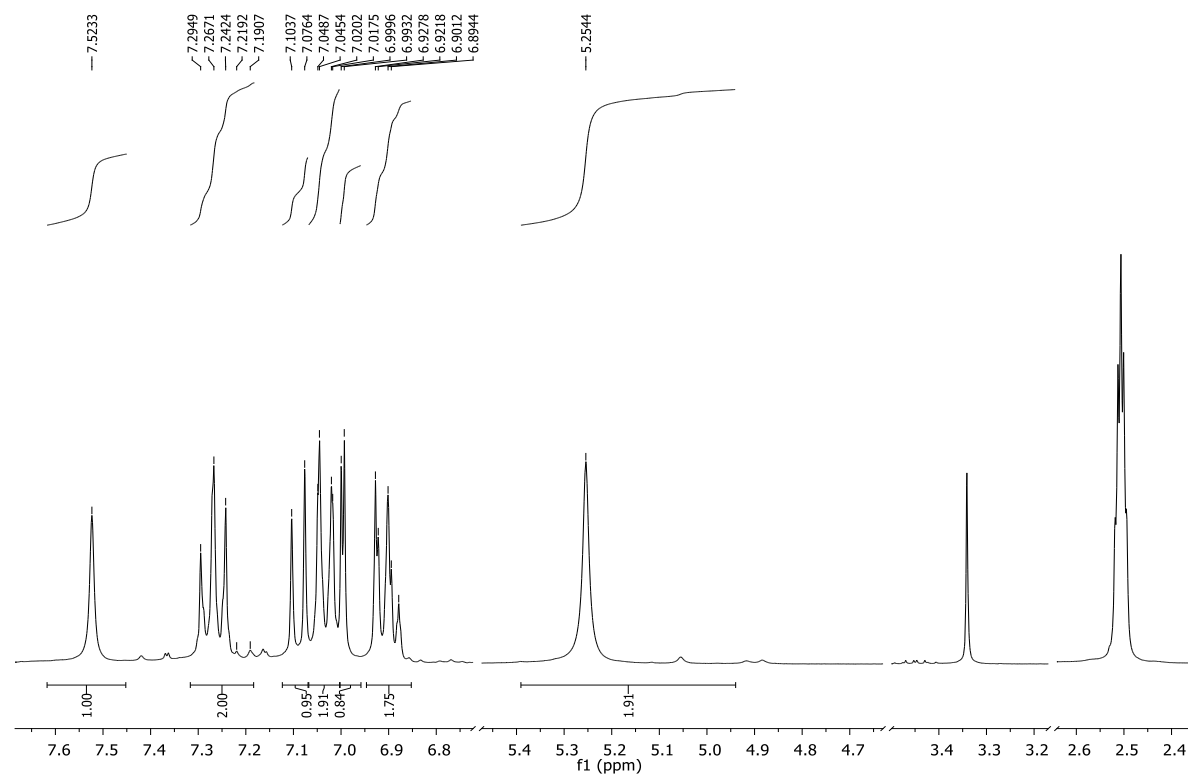

**Figure S17.**  $^1\text{H}$  NMR spectrum (DMSO- $d_6$ , 300 MHz) of 4-amino-3-(phenylamino)benzonitrile **10**

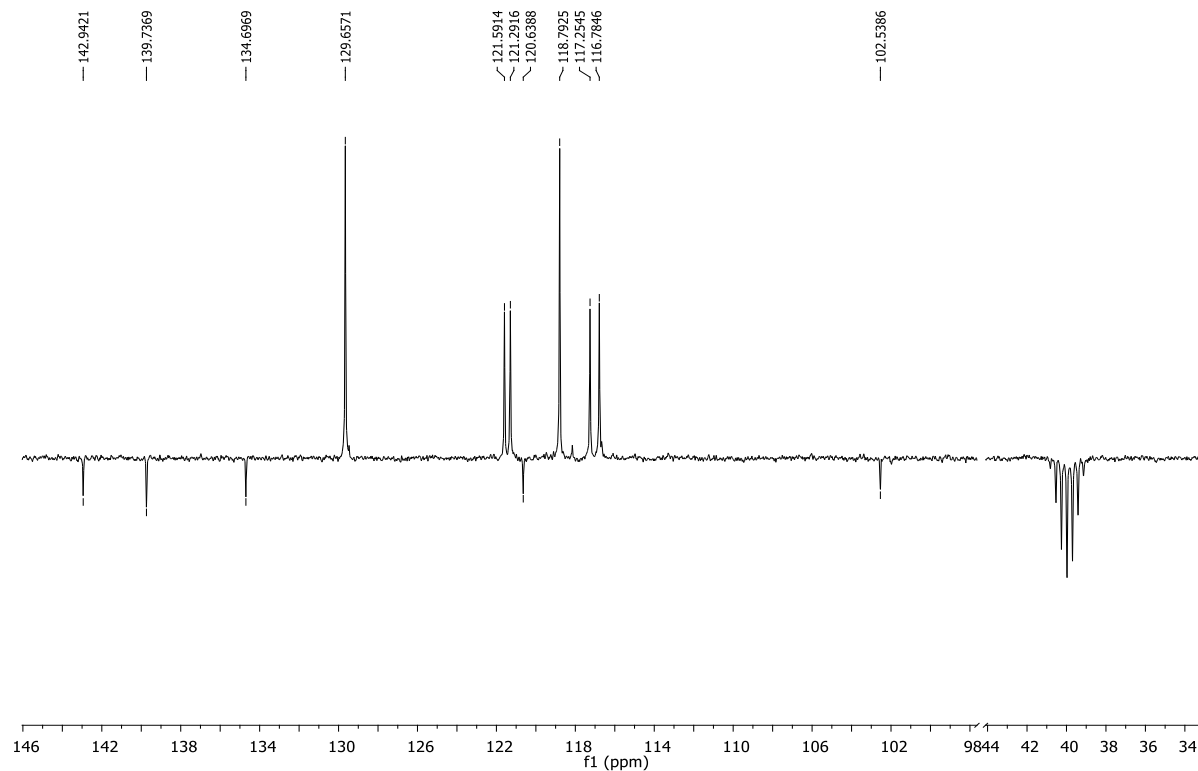

**Figure S18.**  $^{13}\text{C}$  NMR spectrum (DMSO- $d_6$ , 75 MHz) of 4-amino-3-(phenylamino)benzonitrile **10**

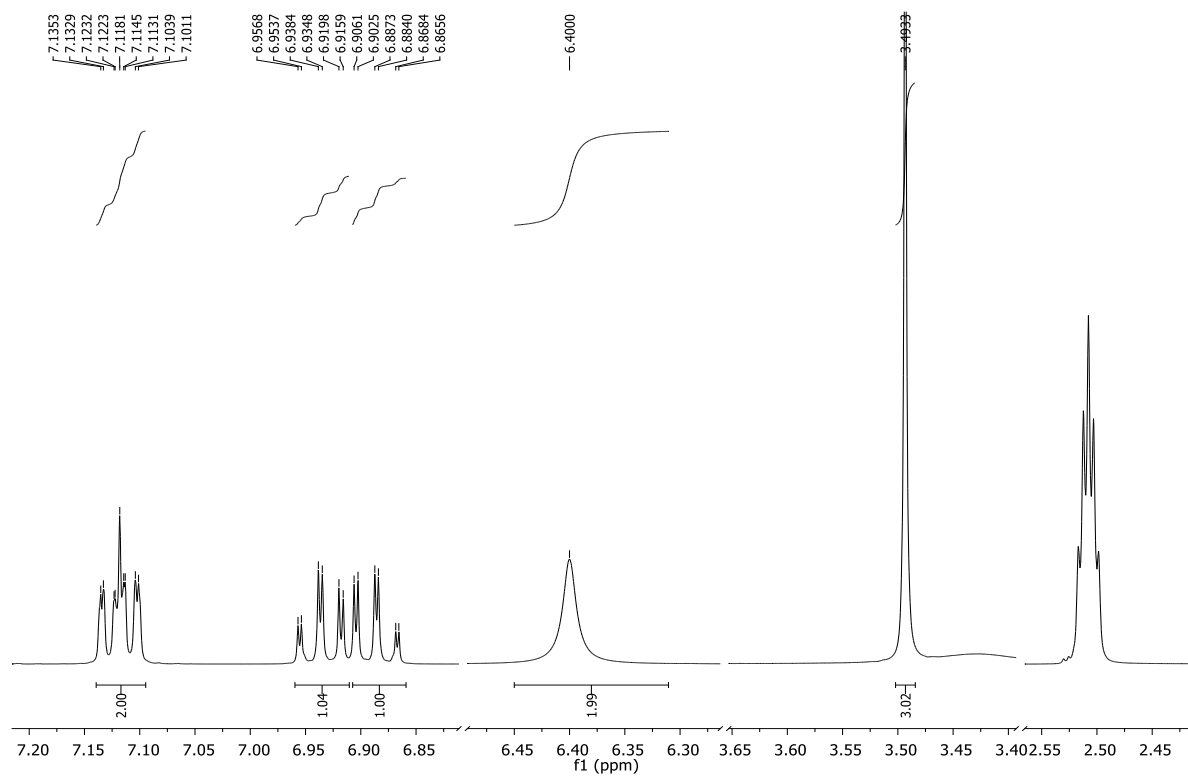

**Figure S19.**  $^1\text{H}$  NMR spectrum (DMSO- $d_6$ , 400 MHz) of 2-amino-1-methylbenzimidazole **13**

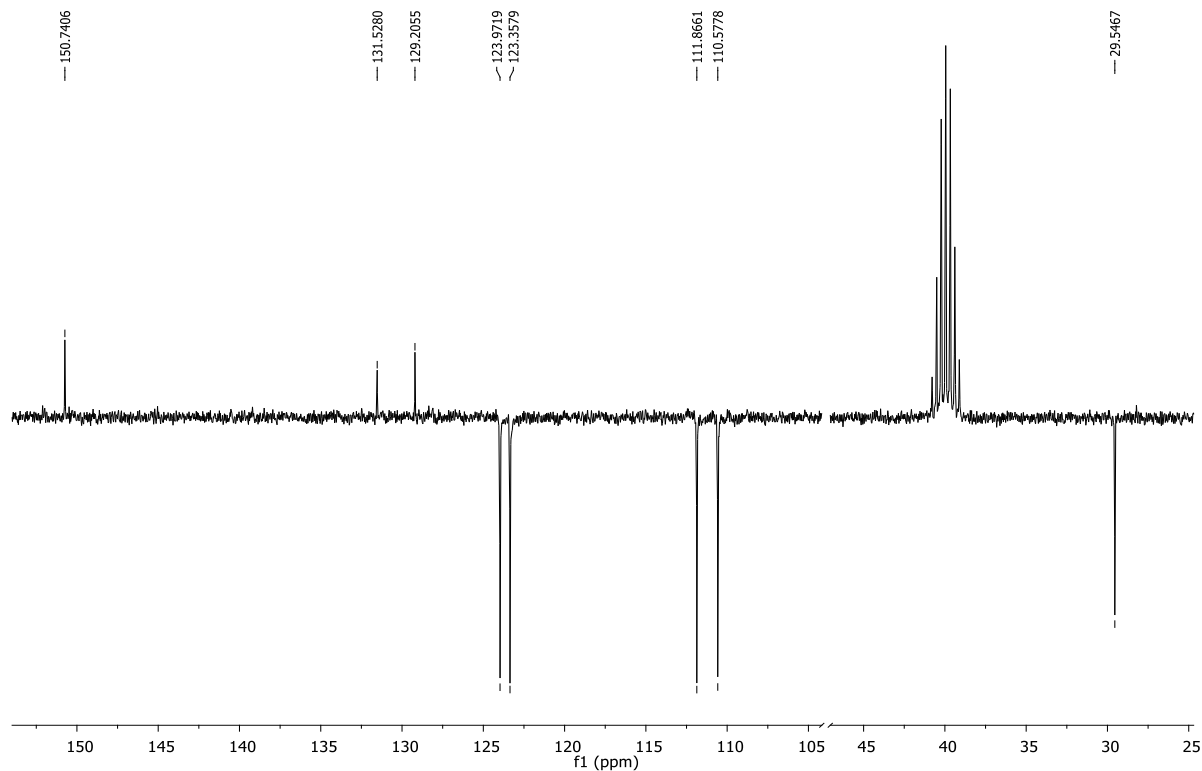

**Figure S20.**  $^{13}\text{C}$  NMR spectrum (DMSO- $d_6$ , 75 MHz) of 2-amino-1-methylbenzimidazole **13**

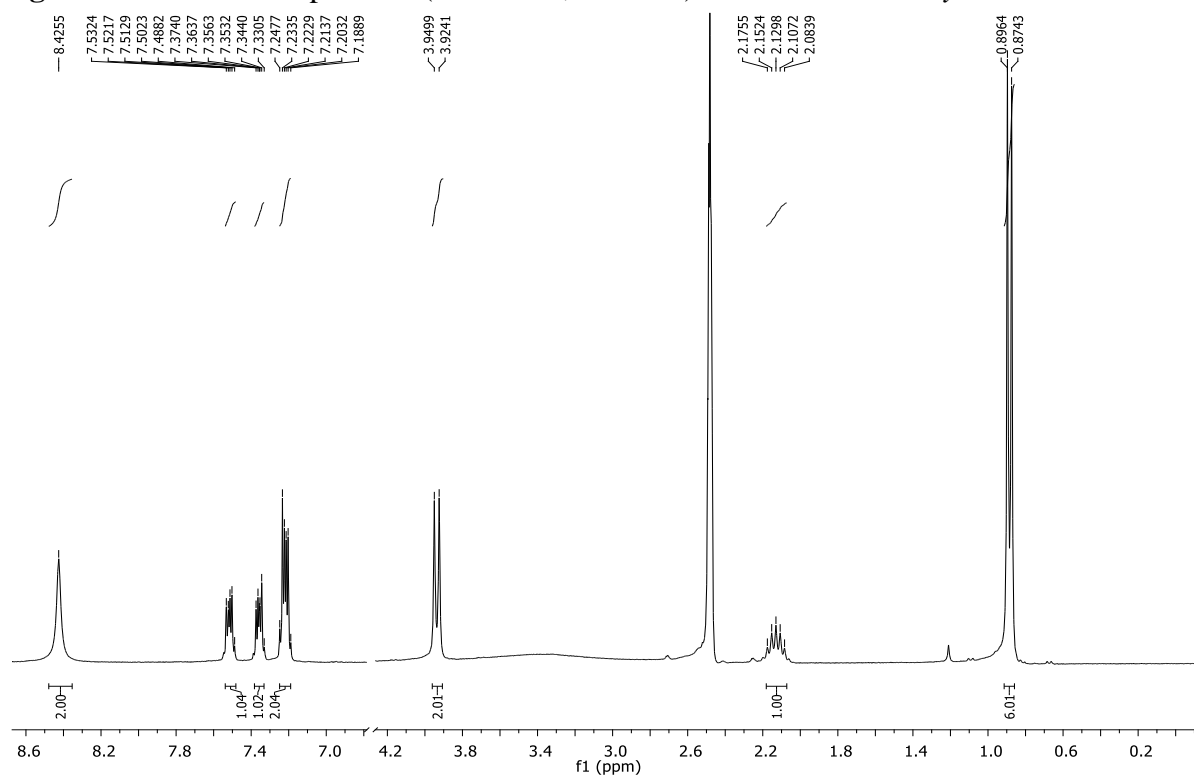

**Figure S21.**  $^1\text{H}$  NMR spectrum (DMSO- $d_6$ , 300 MHz) of 2-amino-1-isobutylbenzimidazole **14**

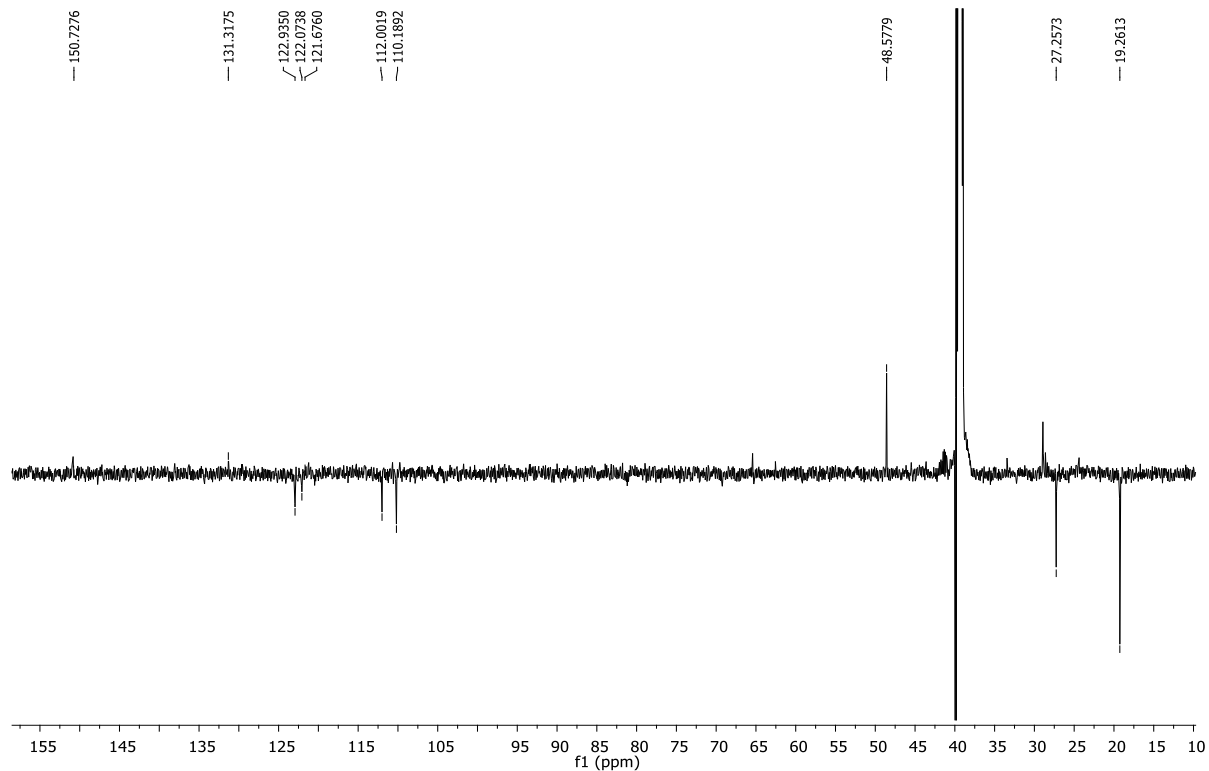

**Figure S22.**  $^{13}\text{C}$  NMR spectrum (DMSO- $d_6$ , 151 MHz) of 2-amino-1-isobutylbenzimidazole **14**

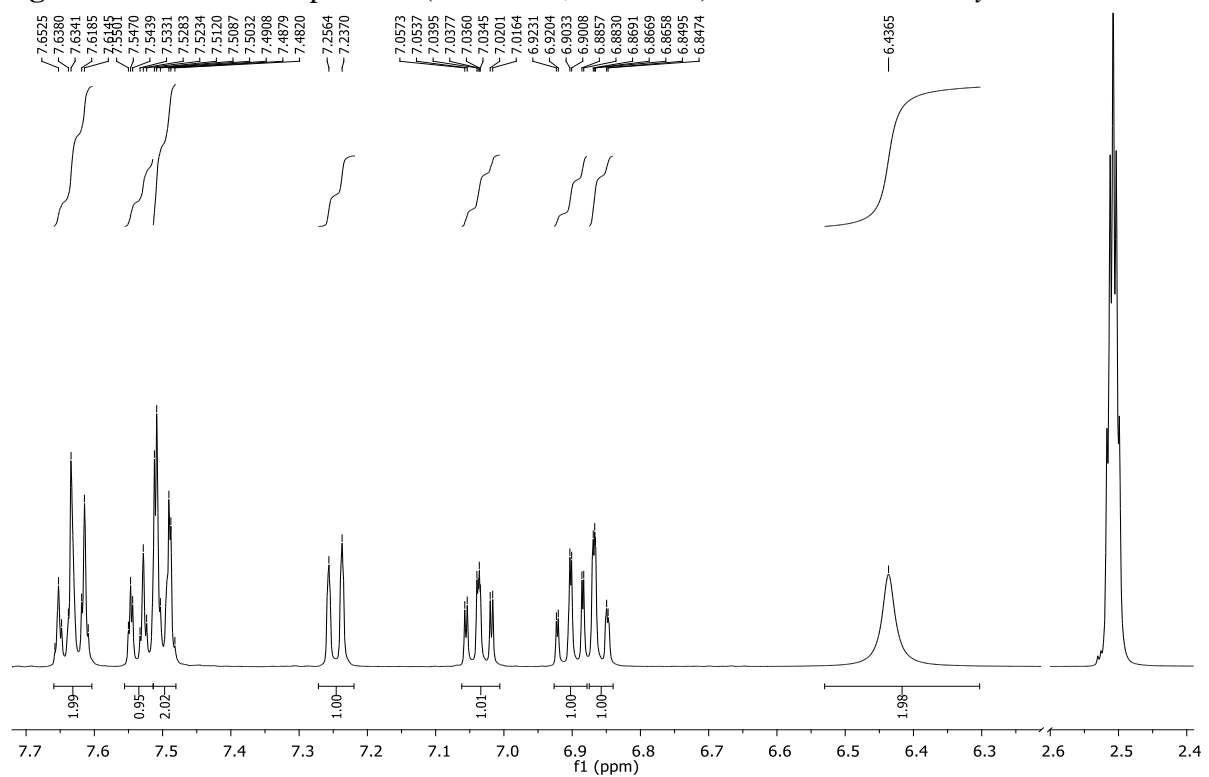

**Figure S23.**  $^1\text{H}$  NMR spectrum (DMSO- $d_6$ , 400 MHz) of 2-amino-1-phenylbenzimidazole **15**

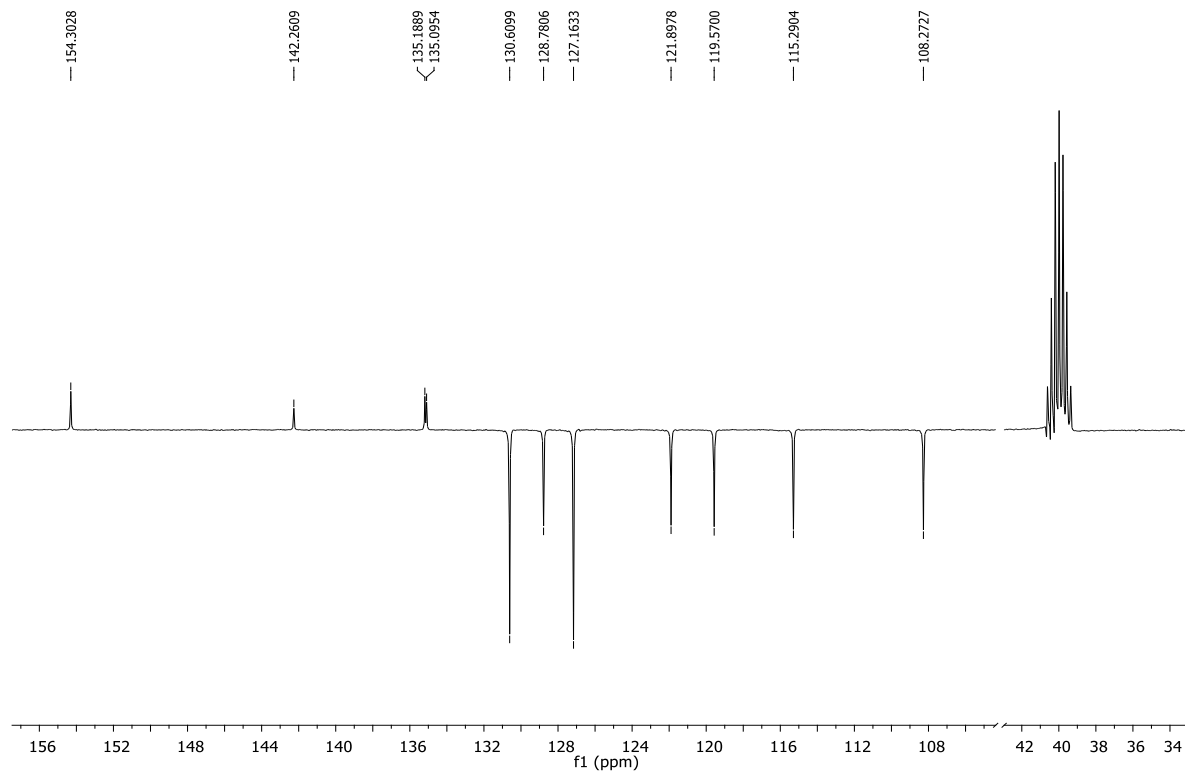

**Figure S24.**  $^{13}\text{C}$  NMR spectrum (DMSO- $d_6$ , 101 MHz) of 2-amino-1-phenylbenzimidazole **15**

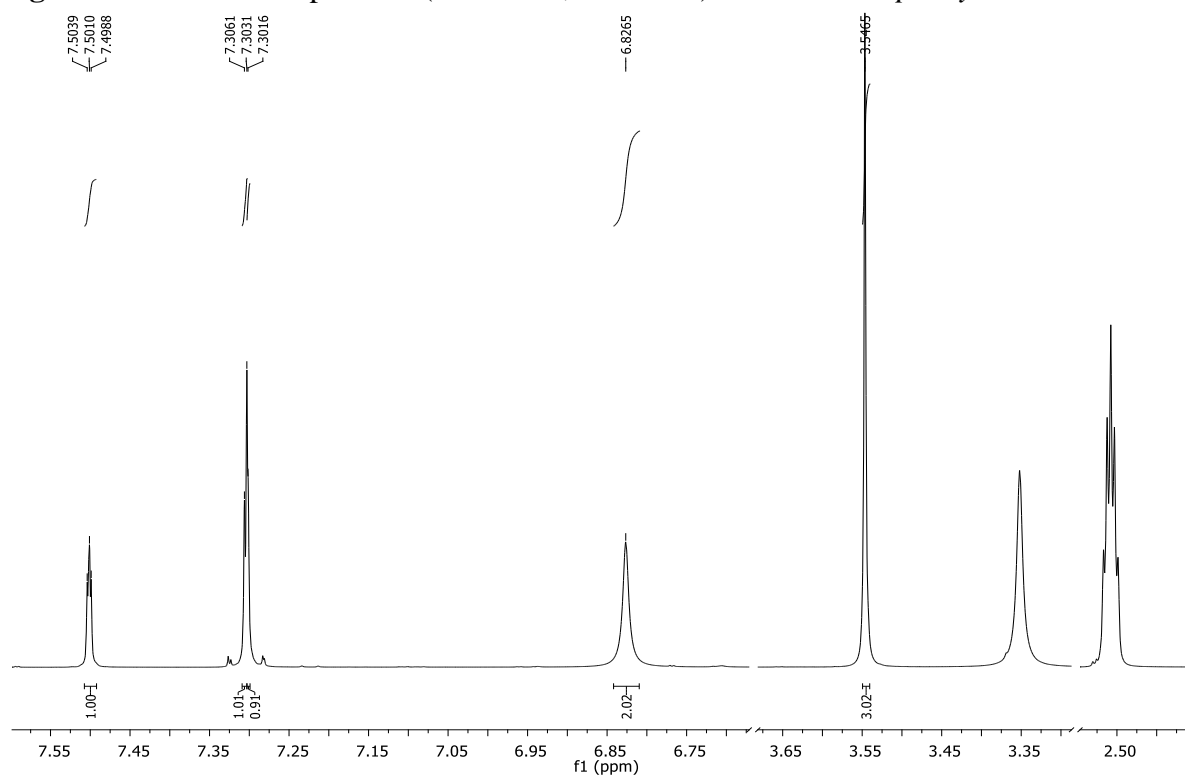

**Figure S25.**  $^1\text{H}$  NMR spectrum (DMSO- $d_6$ , 400 MHz) of 2-amino-6-cyano-1-methylbenzimidazole **16**

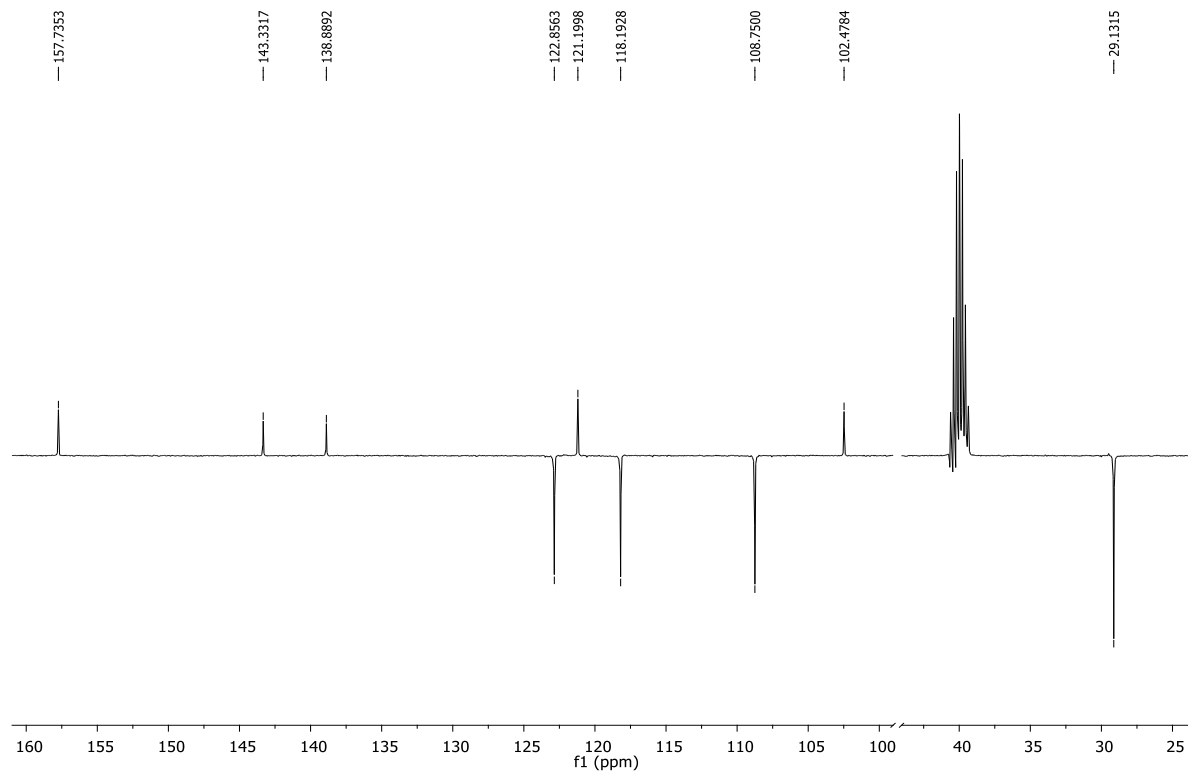

**Figure S26.**  $^{13}\text{C}$  NMR spectrum (DMSO- $d_6$ , 101 MHz) of *2-amino-6-cyano-1-methylbenzimidazole 16*

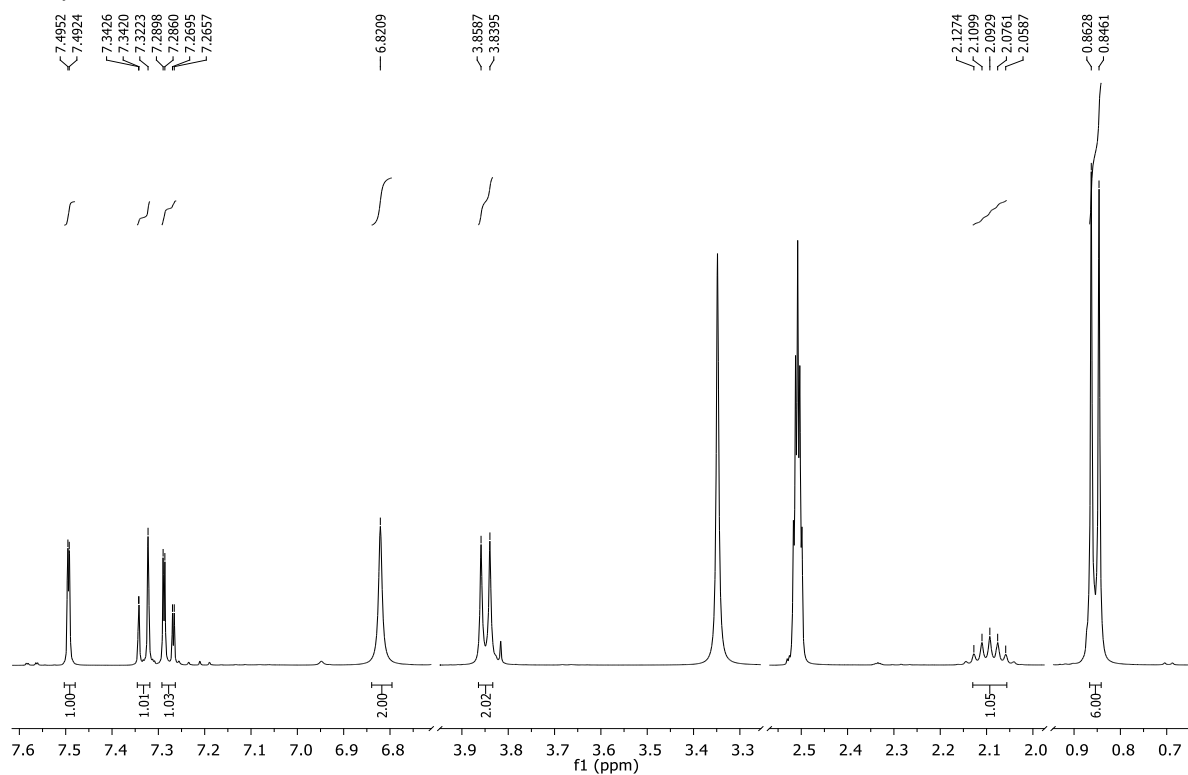

**Figure S27.**  $^1\text{H}$  NMR spectrum (DMSO- $d_6$ , 400 MHz) of *2-amino-6-cyano-1-isobutylbenzimidazole 17*



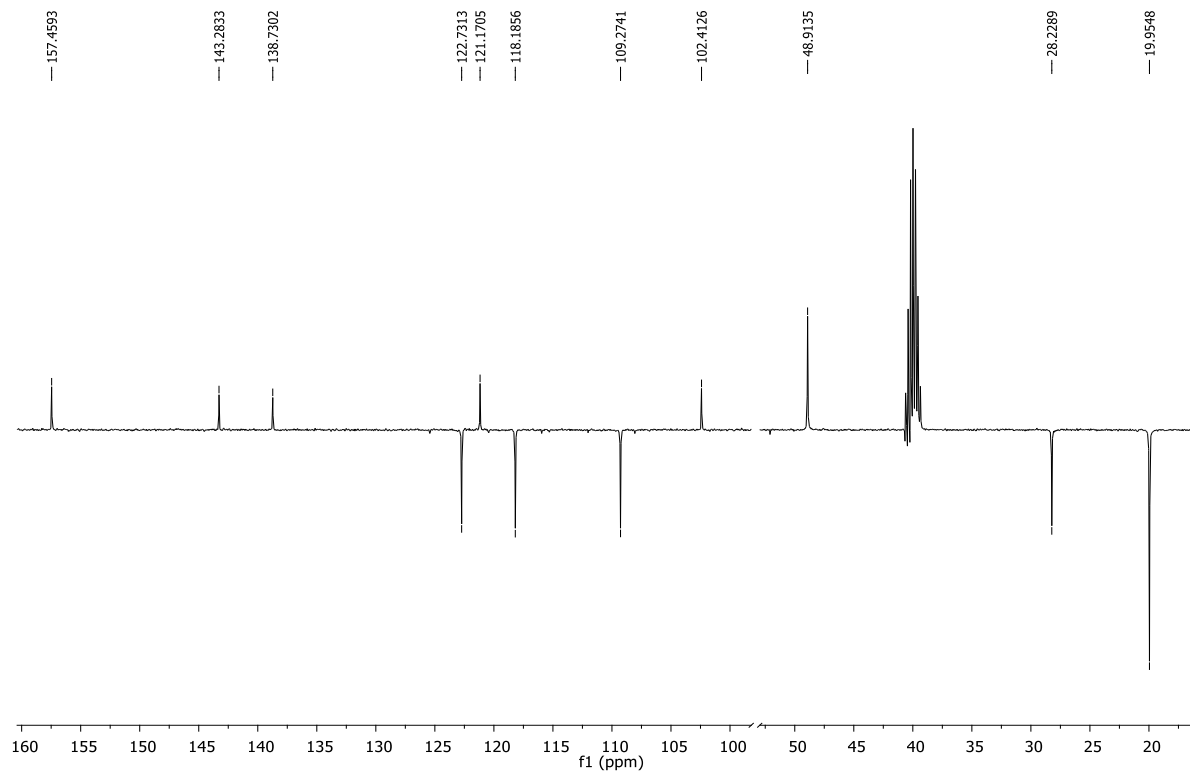

**Figure S28.**  $^{13}\text{C}$  NMR spectrum (DMSO- $d_6$ , 101 MHz) of 2-amino-6-cyano-1-isobutylbenzimidazole **17**

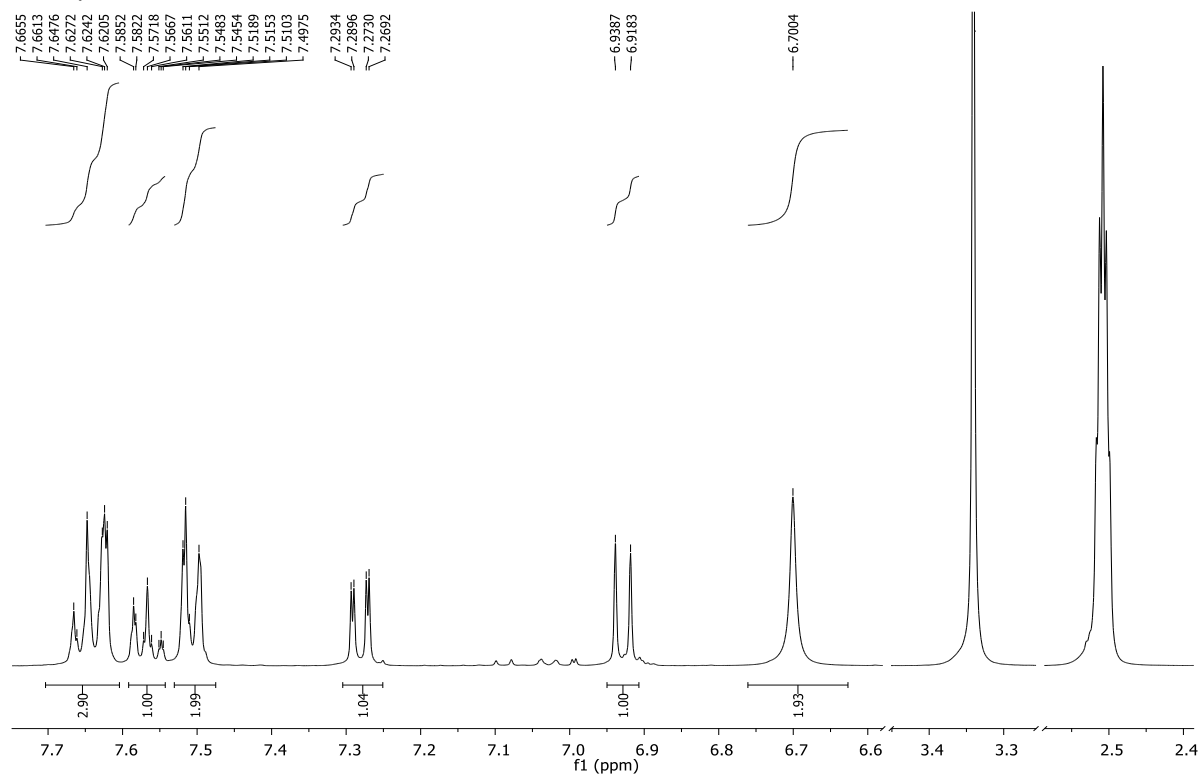

**Figure S29.**  $^1\text{H}$  NMR spectrum (DMSO- $d_6$ , 400 MHz) of 2-amino-6-cyano-1-phenylbenzimidazole **18**

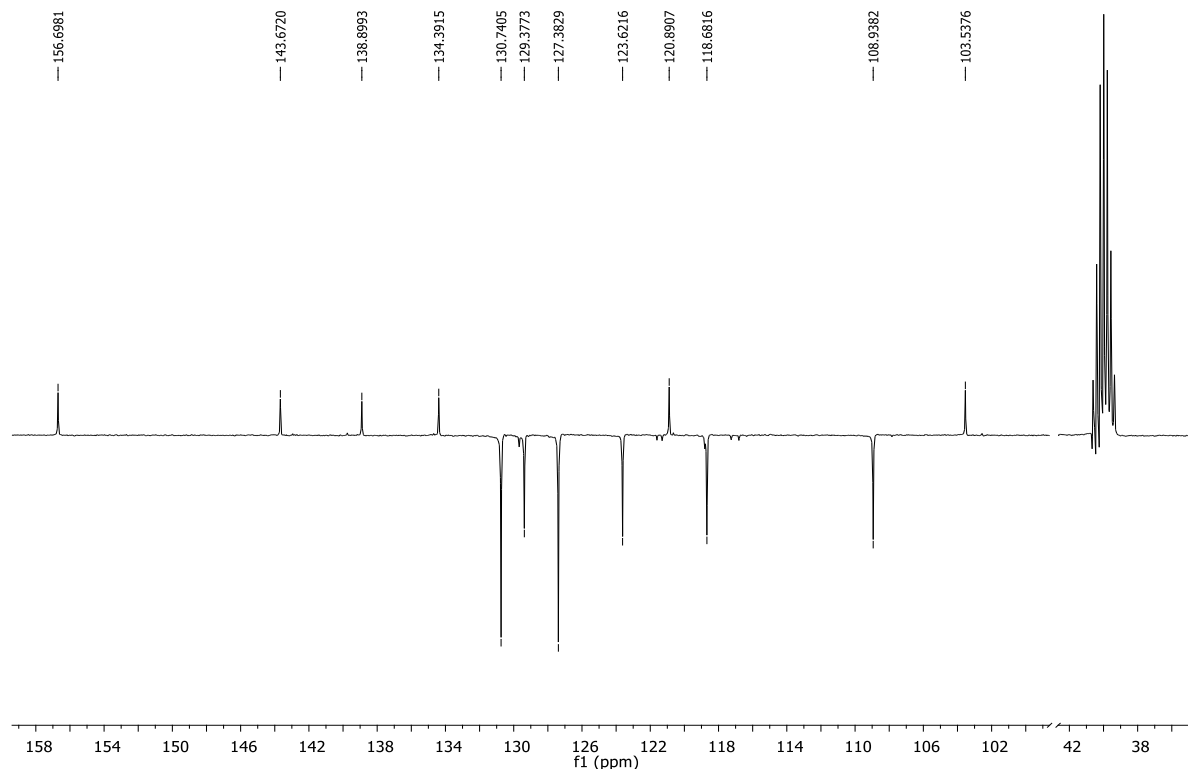

**Figure S30.**  $^{13}\text{C}$  NMR spectrum (DMSO- $d_6$ , 101 MHz) of 2-amino-6-cyano-1-phenylbenzimidazole **18**

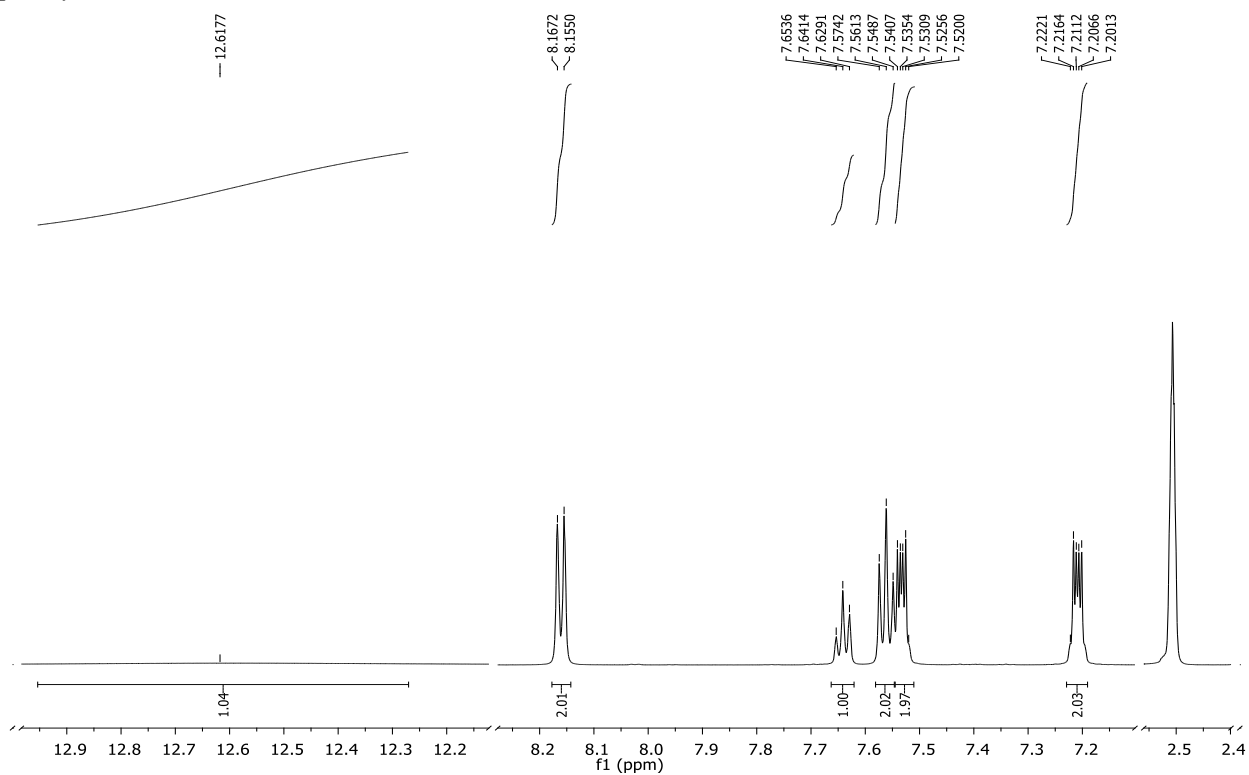

**Figure S31.**  $^1\text{H}$  NMR spectrum (DMSO- $d_6$ , 600 MHz) of *N*-(1*H*-benzo[*d*]imidazol-2-yl)benzamide **24**

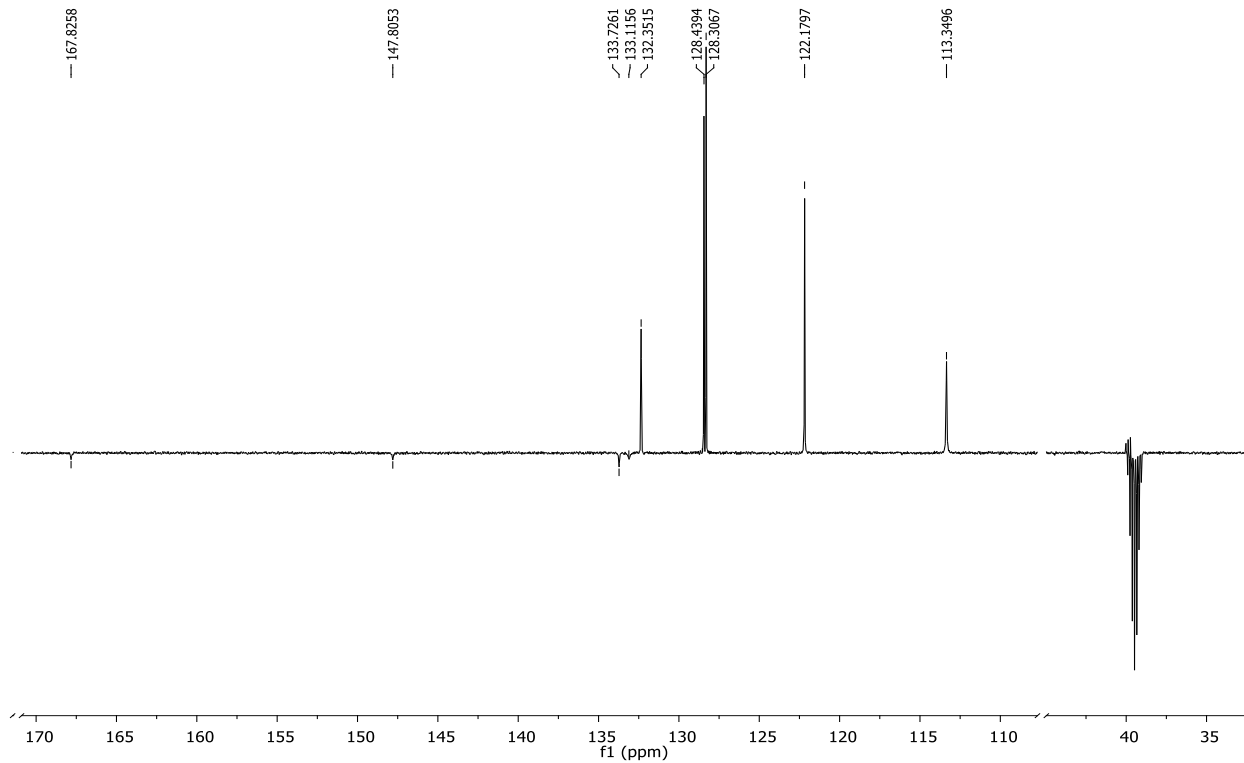

**Figure S32.**  $^{13}\text{C}$  NMR spectrum (DMSO- $d_6$ , 151 MHz) of *N*-(1*H*-benzo[*d*]imidazol-2-yl)benzamide **24**

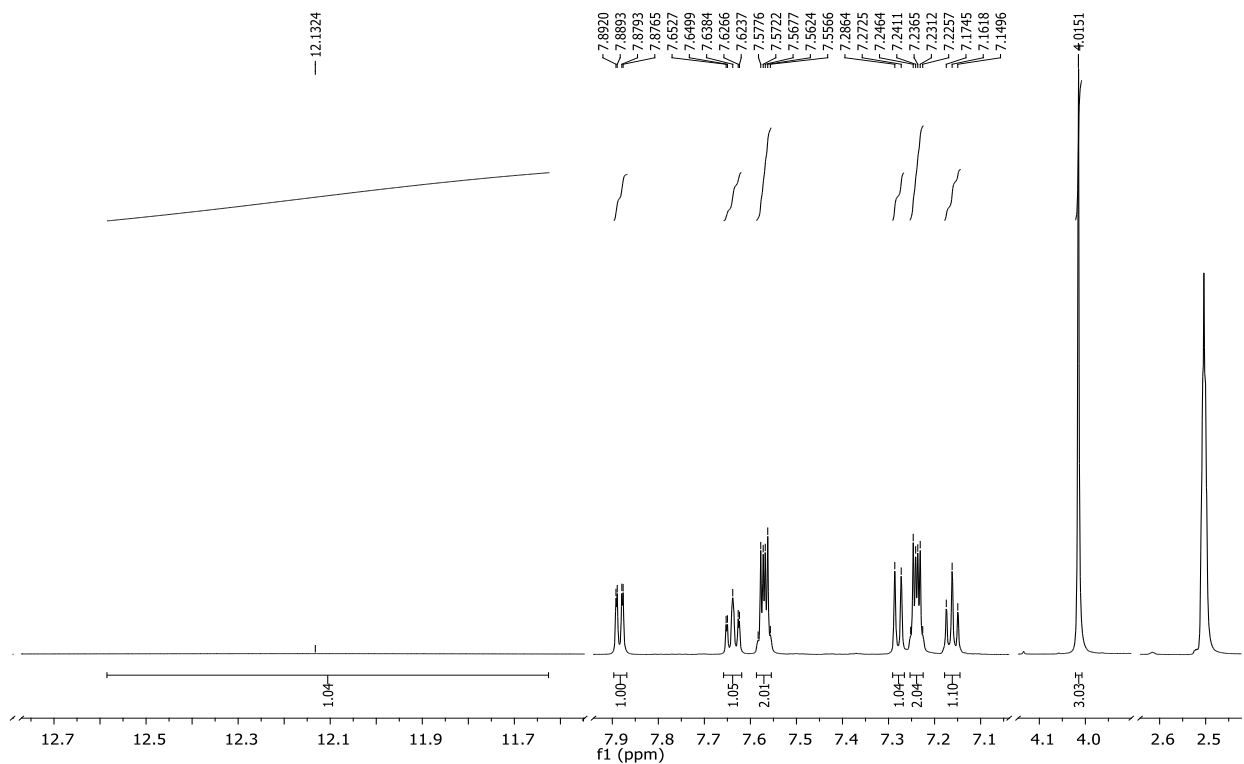

**Figure S33.**  $^1\text{H}$  NMR spectrum (DMSO- $d_6$ , 600 MHz) of *N*-(1*H*-benzo[*d*]imidazol-2-yl)-2-methoxybenzamide **25**

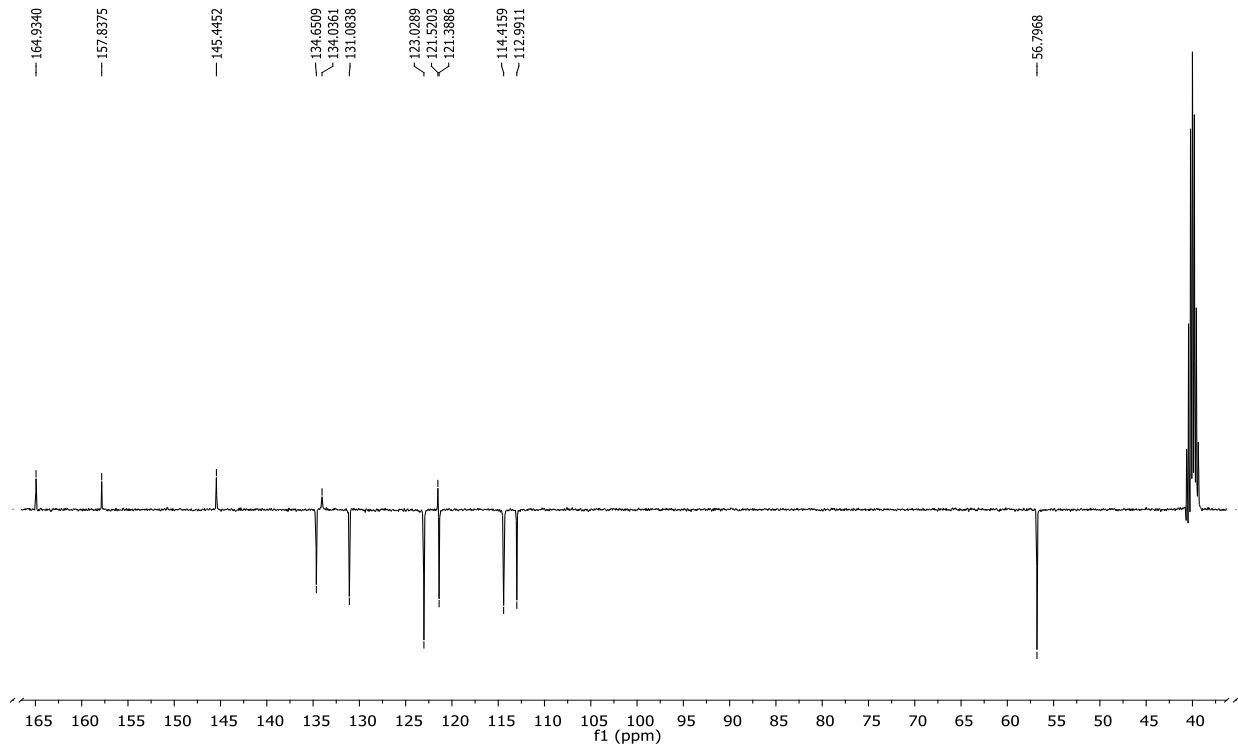

**Figure S34.**  $^{13}\text{C}$  NMR spectrum (DMSO- $d_6$ , 101 MHz) of *N*-(1*H*-benzo[*d*]imidazol-2-yl)-2-methoxybenzamide **25**

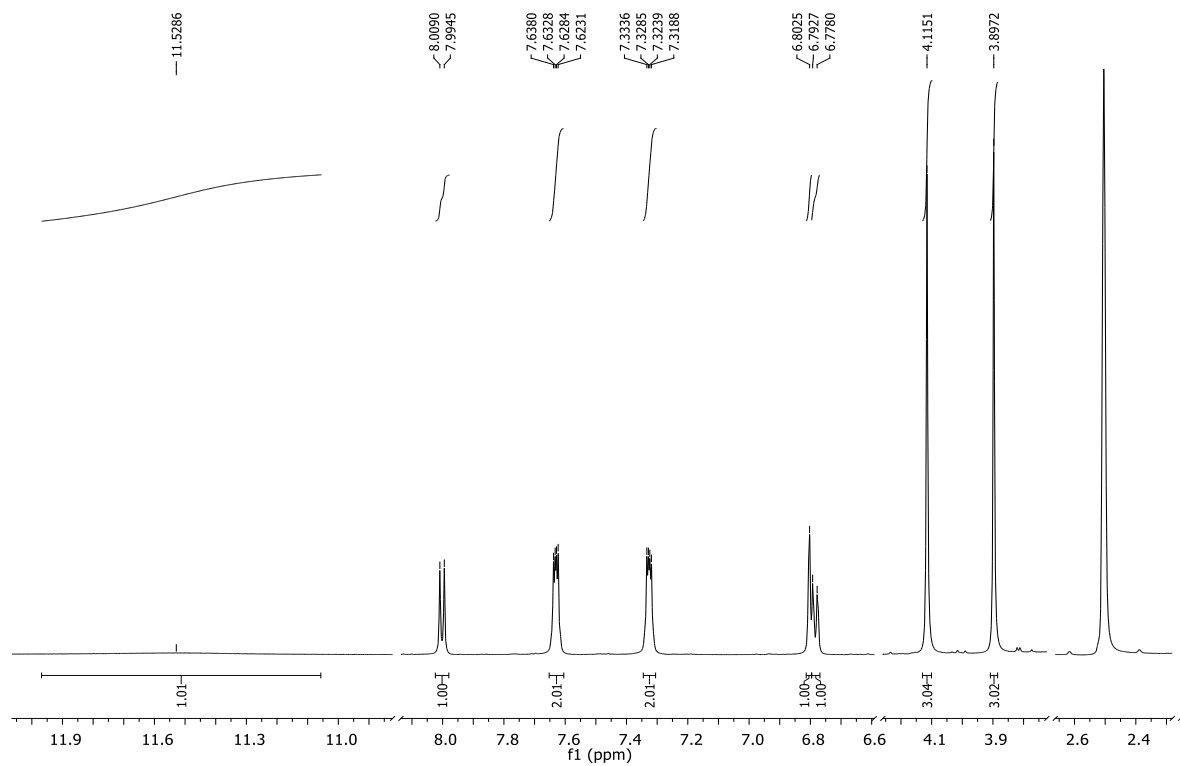

**Figure S35.**  $^1\text{H}$  NMR spectrum (DMSO- $d_6$ , 600 MHz) of *N*-(1*H*-benzo[*d*]imidazol-2-yl)-2,4-dimethoxybenzamide **26**

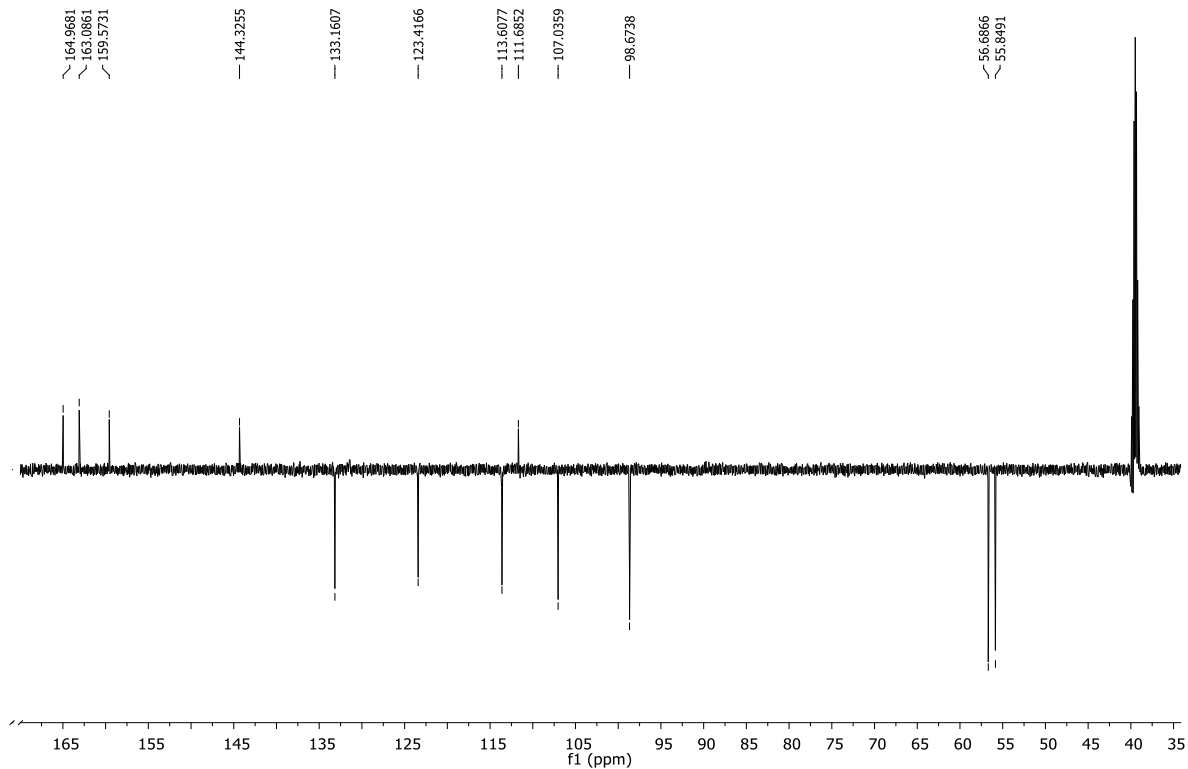

**Figure S36.**  $^{13}\text{C}$  NMR spectrum (DMSO- $d_6$ , 151 MHz) of *N*-(1*H*-benzo[*d*]imidazol-2-yl)-2,4-dimethoxybenzamide **26**

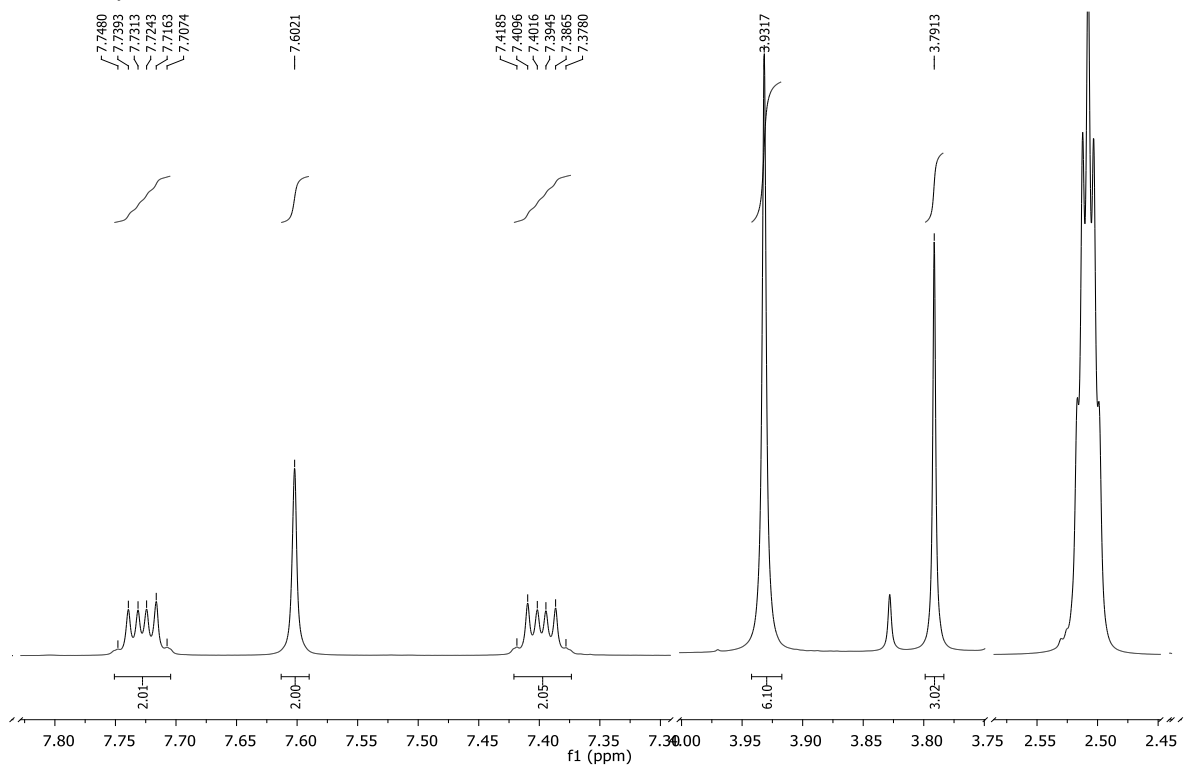

**Figure S37.**  $^1\text{H}$  NMR spectrum (DMSO- $d_6$ , 400 MHz) of *N*-(1*H*-benzo[*d*]imidazol-2-yl)-3,4,5-trimethoxybenzamide **27**

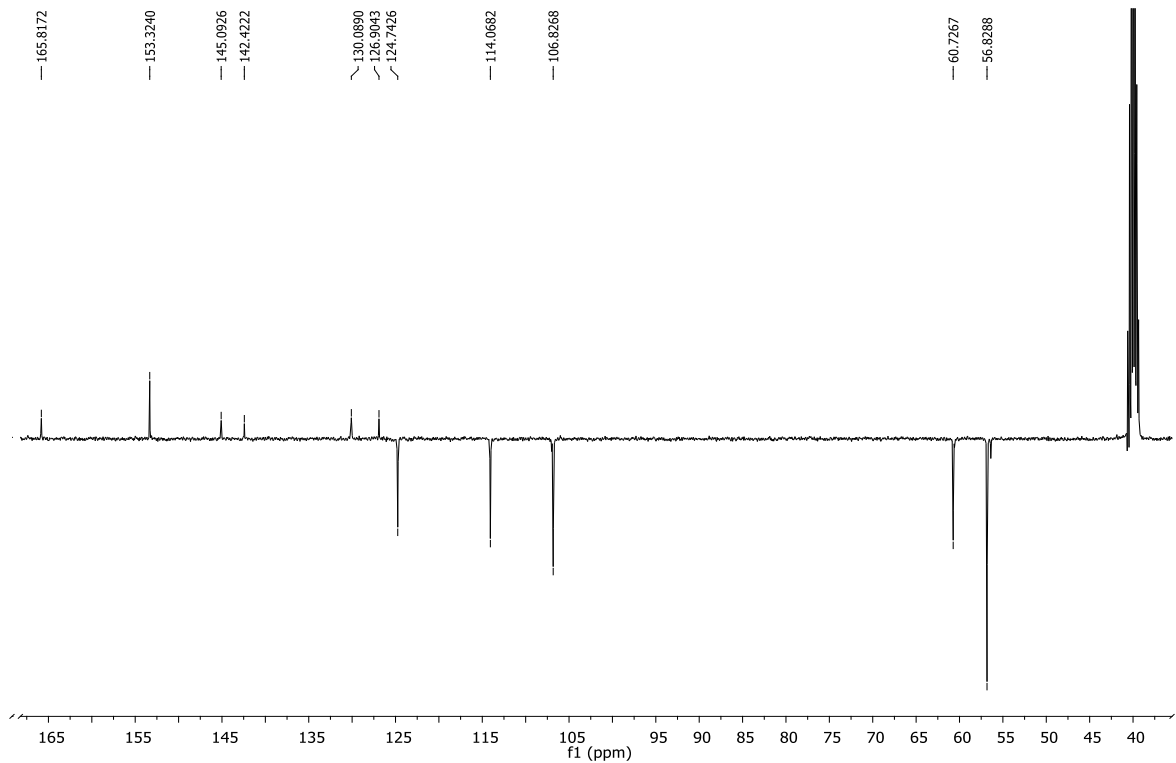

**Figure S38.**  $^{13}\text{C}$  NMR spectrum (DMSO- $d_6$ , 101 MHz) of *N*-(1*H*-benzo[*d*]imidazol-2-yl)-3,4,5-trimethoxybenzamide **27**

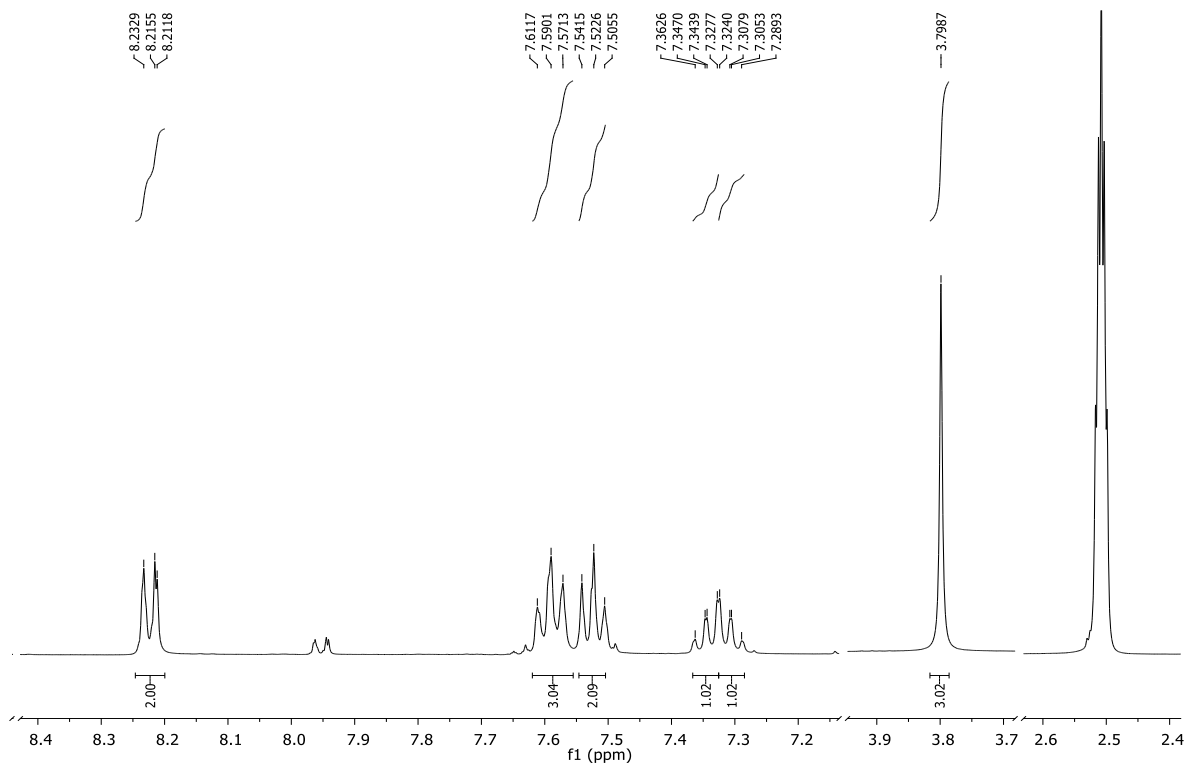

**Figure S39.**  $^1\text{H}$  NMR spectrum (DMSO- $d_6$ , 400 MHz) of *N*-(1-methyl-1*H*-benzo[*d*]imidazol-2-yl)benzamide **28**

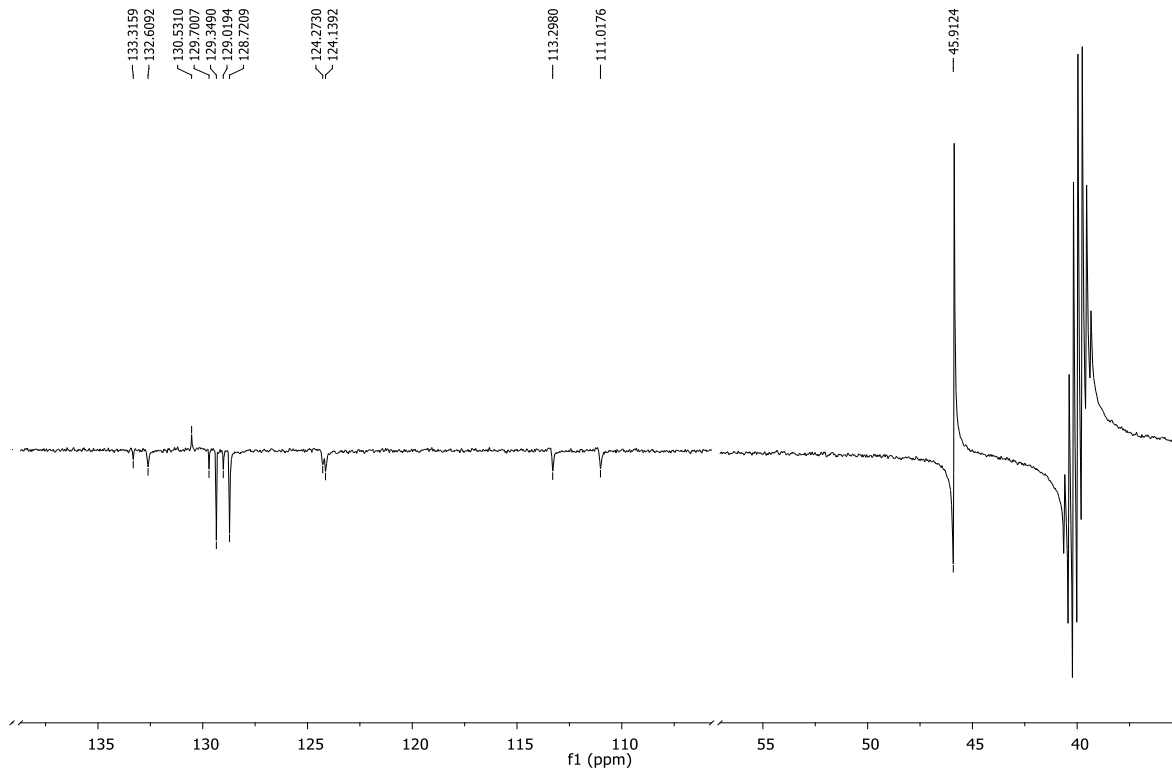

**Figure S40.**  $^{13}\text{C}$  NMR spectrum (DMSO- $d_6$ , 101 MHz) of *N*-(1-methyl-1H-benzo[d]imidazol-2-yl)benzamide **28**

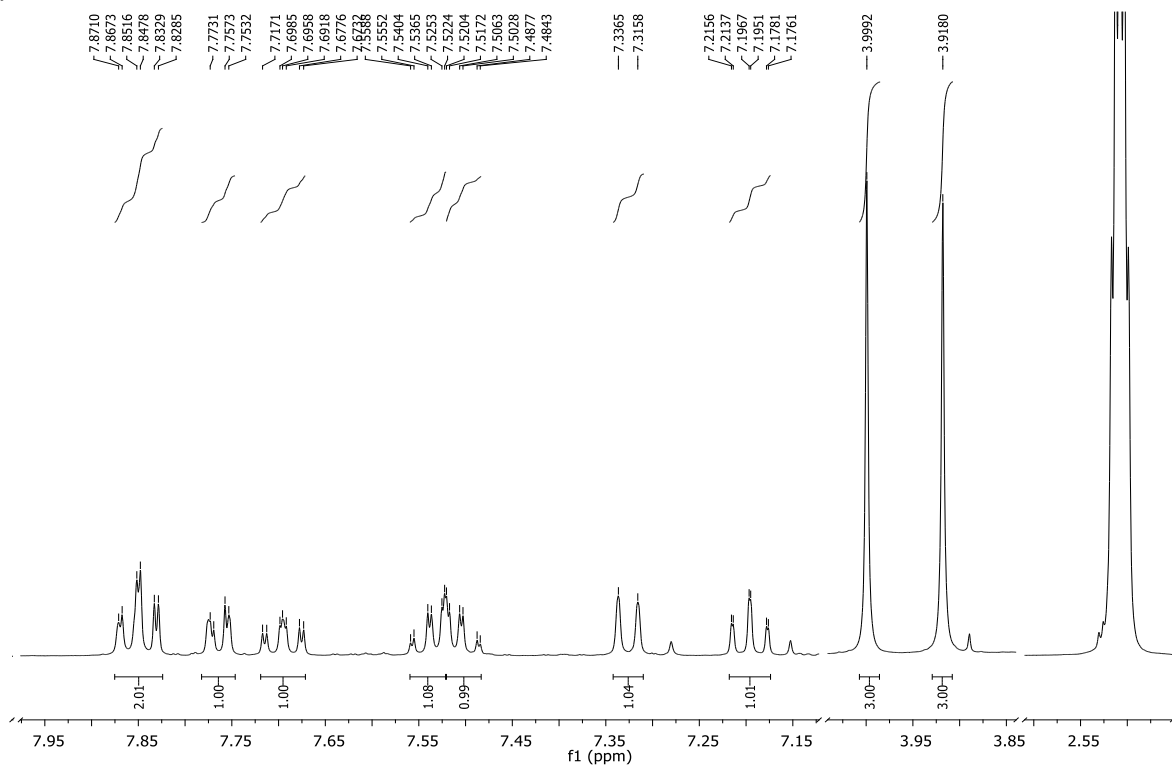

**Figure S41.**  $^1\text{H}$  NMR spectrum (DMSO- $d_6$ , 400 MHz) of 2-methoxy-*N*-(1-methyl-1H-benzo[d]imidazol-2-yl)benzamide **29**

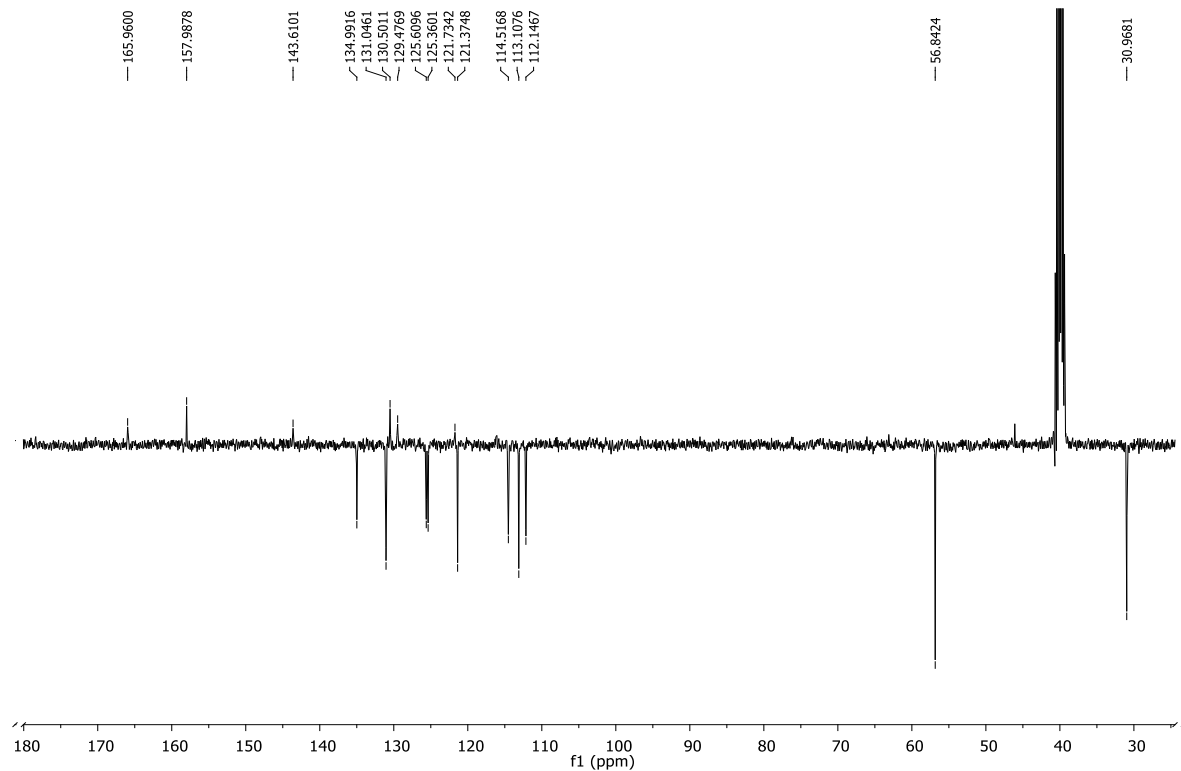

**Figure S42.**  $^{13}\text{C}$  NMR spectrum (DMSO- $d_6$ , 101 MHz) of 2-methoxy-N-(1-methyl-1H-benzod[j]imidazol-2-yl)benzamide **29**

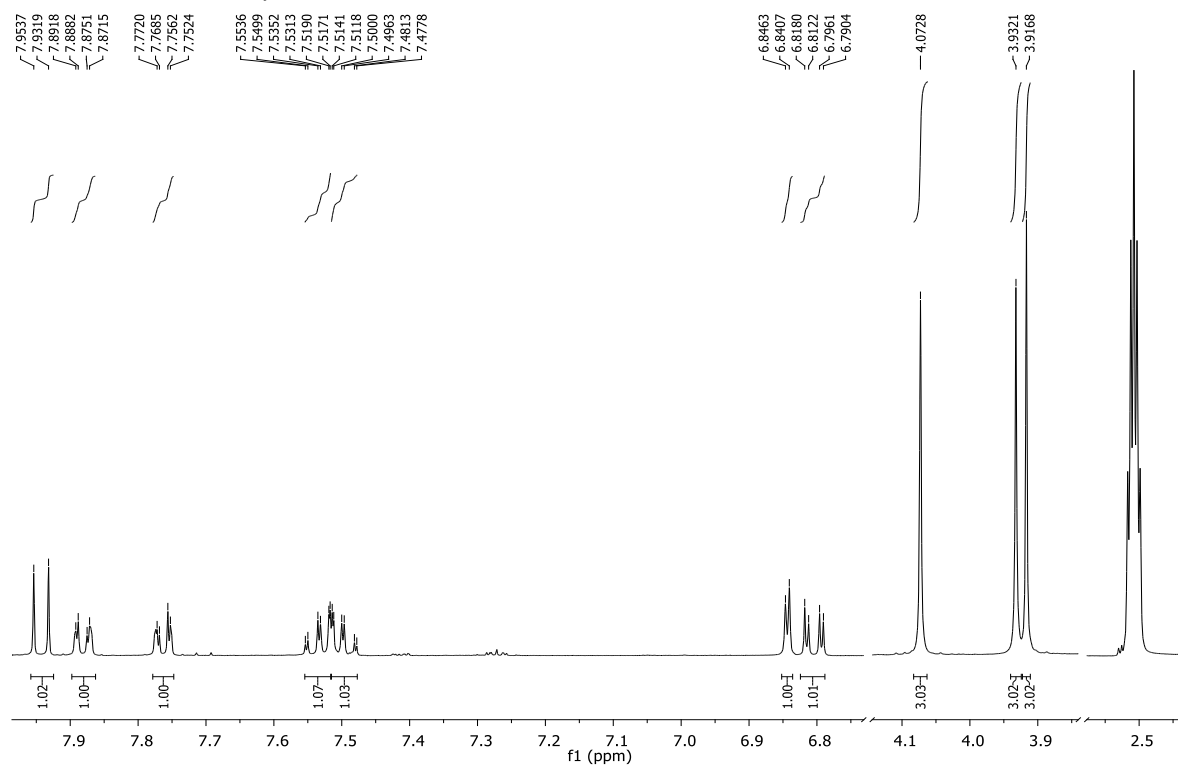

**Figure S43.**  $^1\text{H}$  NMR spectrum (DMSO- $d_6$ , 400 MHz) of 2,4-dimethoxy-N-(1-methyl-1H-benzod[j]imidazol-2-yl)benzamide **30**



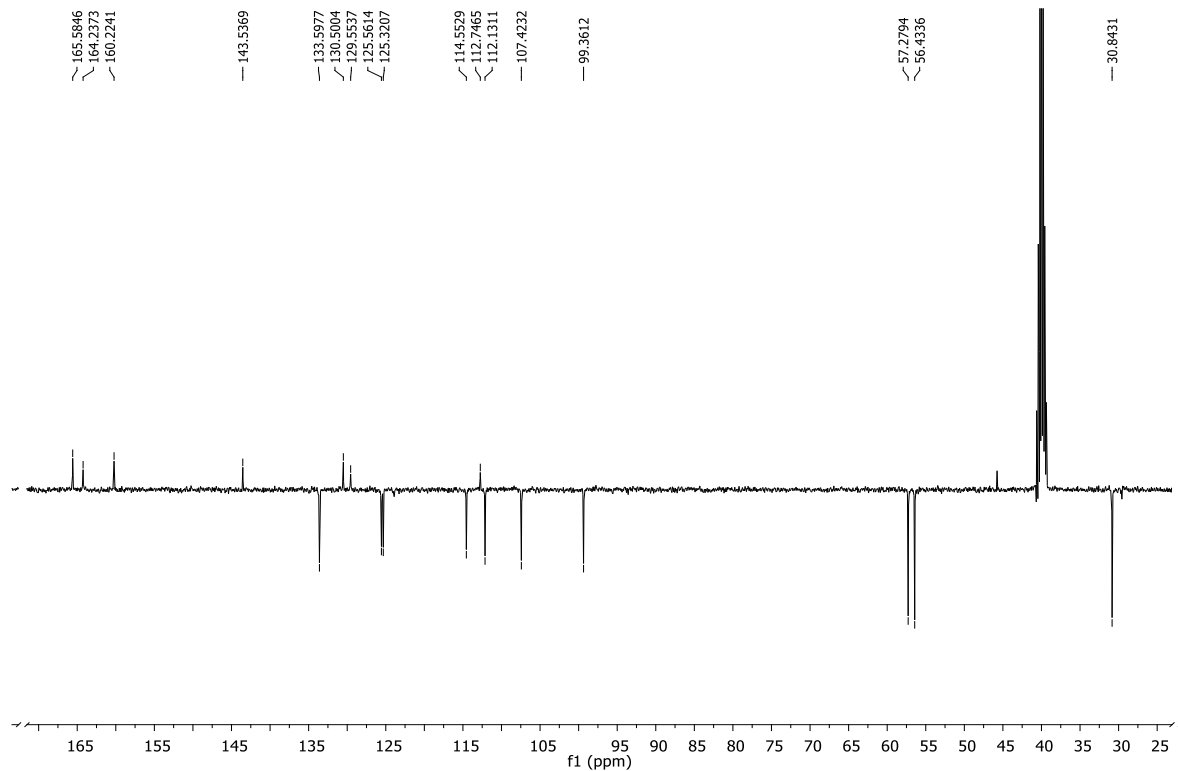

**Figure S44.**  $^{13}\text{C}$  NMR spectrum (DMSO- $d_6$ , 101 MHz) of 2,4-dimethoxy-*N*-(1-methyl-1*H*-benzo[*d*]imidazol-2-yl)benzamide **30**

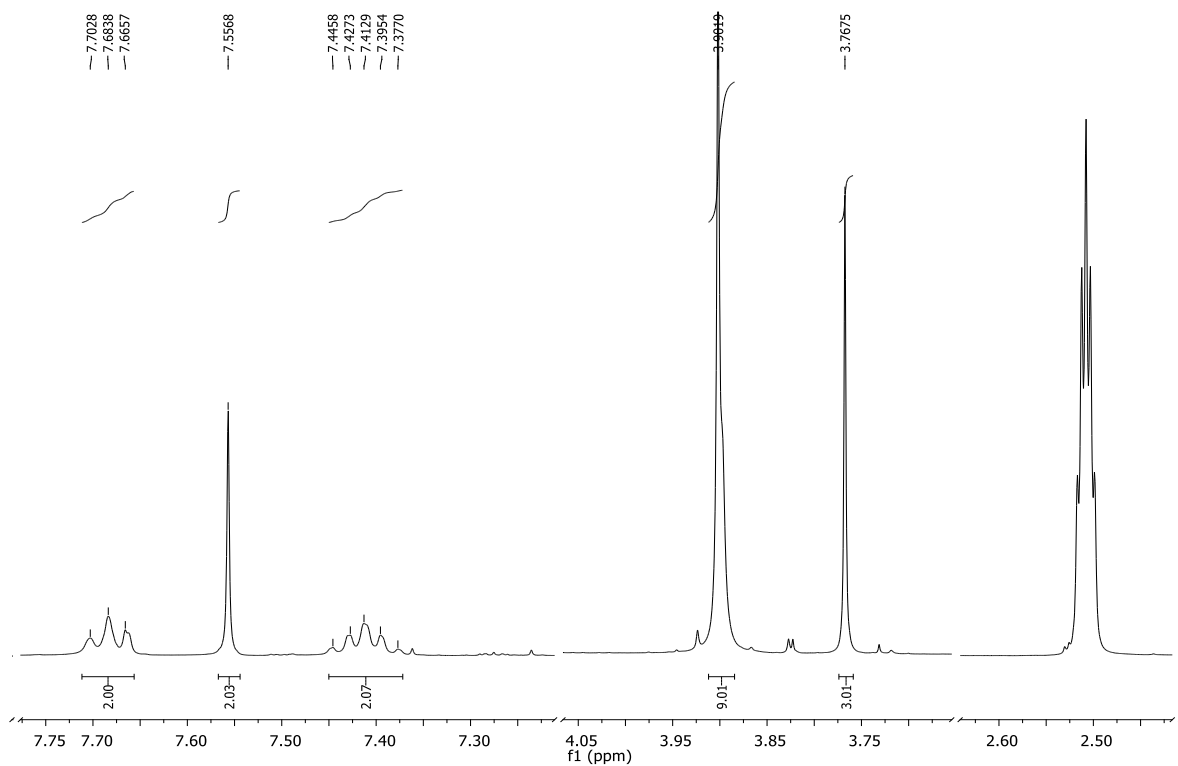

**Figure S45.**  $^1\text{H}$  NMR spectrum (DMSO- $d_6$ , 400 MHz) of 3,4,5-trimethoxy-*N*-(1-methyl-1*H*-benzo[*d*]imidazol-2-yl)benzamide **31**

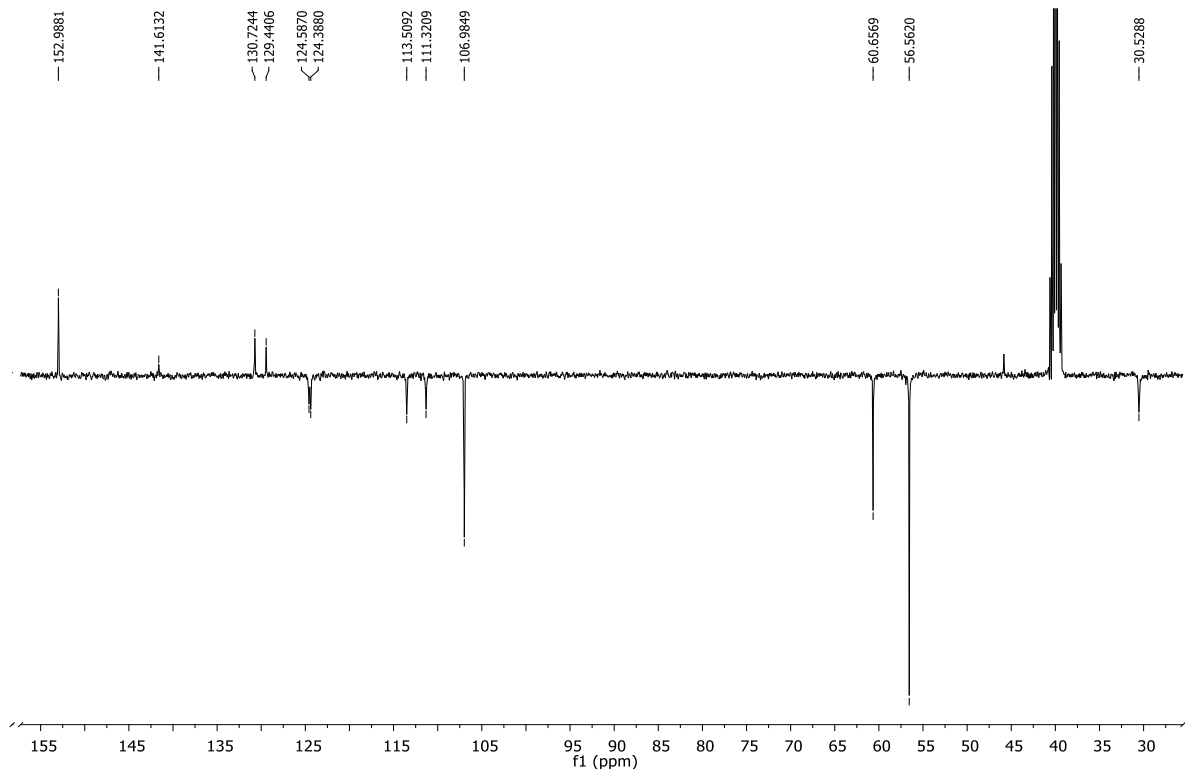

**Figure S46.**  $^{13}\text{C}$  NMR spectrum (DMSO- $d_6$ , 101 MHz) of 3,4,5-trimethoxy-*N*-(1-methyl-1*H*-benzo[d]imidazol-2-yl)benzamide **31**

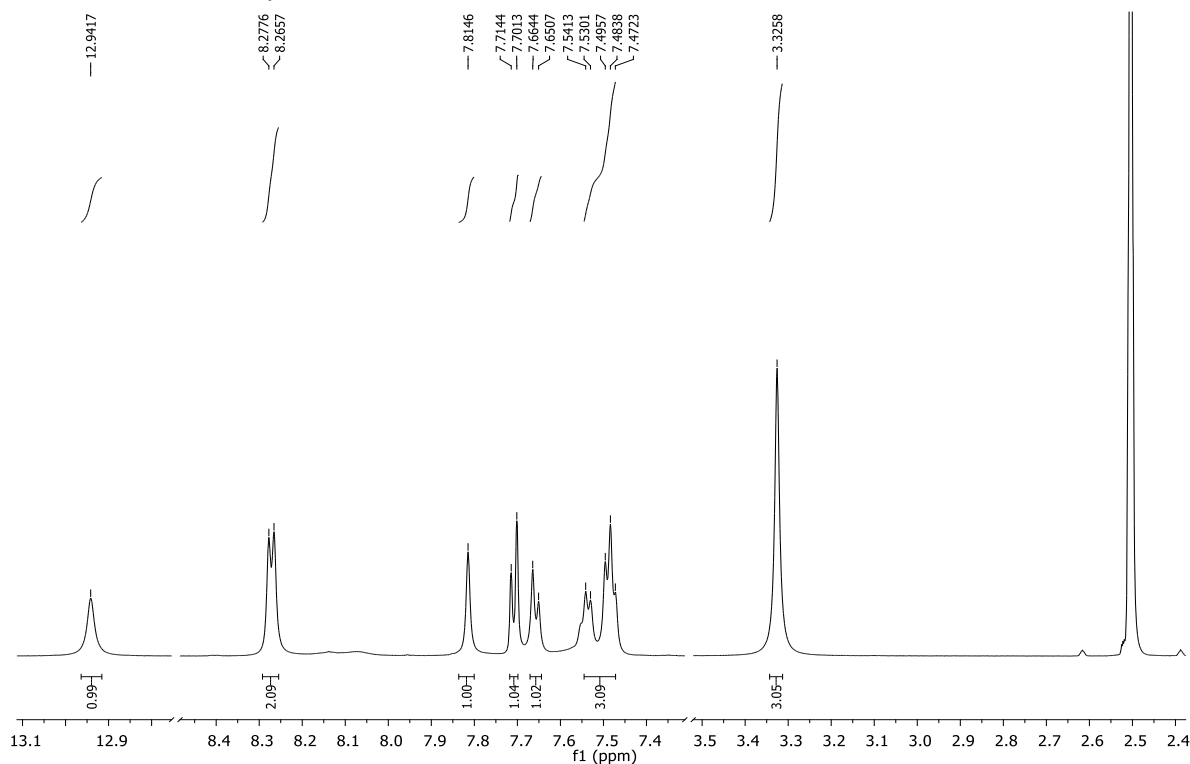

**Figure S47.**  $^1\text{H}$  NMR spectrum (DMSO- $d_6$ , 600 MHz) of *N*-(6-cyano-1-methyl-1*H*-benzo[d]imidazol-2-yl)benzamide **32**

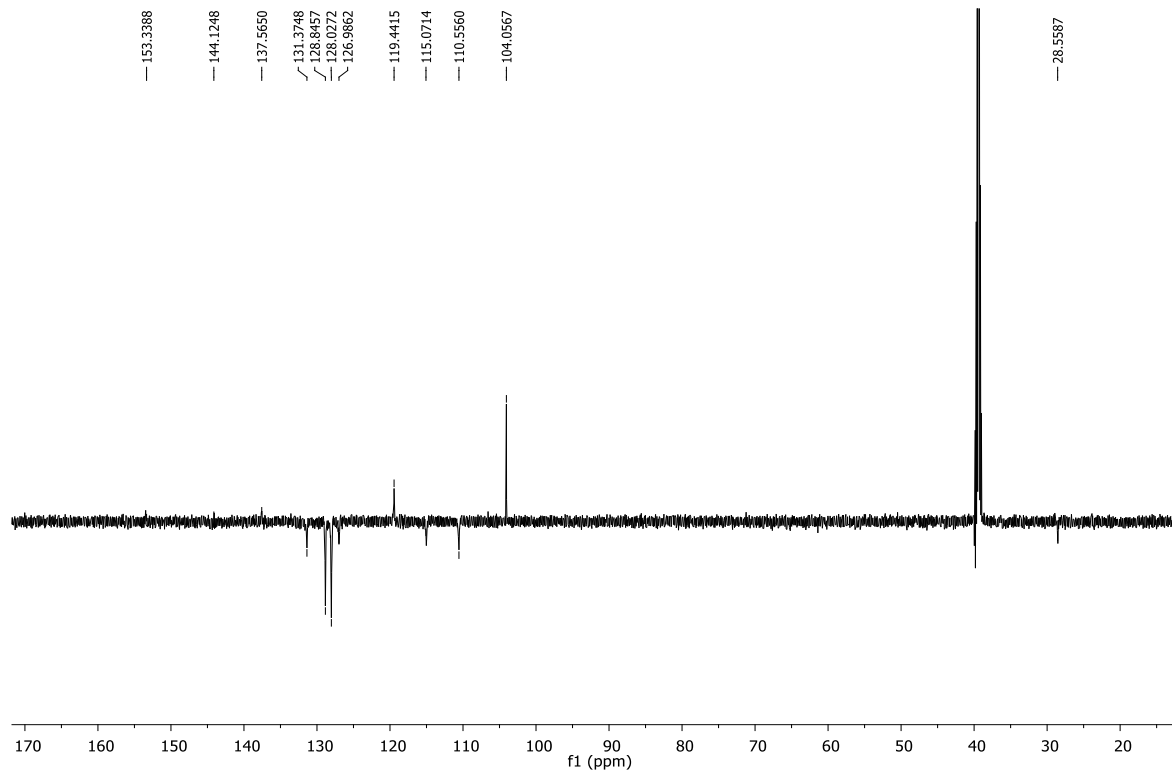

**Figure S48.**  $^{13}\text{C}$  NMR spectrum (DMSO- $d_6$ , 151 MHz) of *N*-(6-cyano-1-methyl-1H-benzod[imidazol-2-yl)benzamide **32**

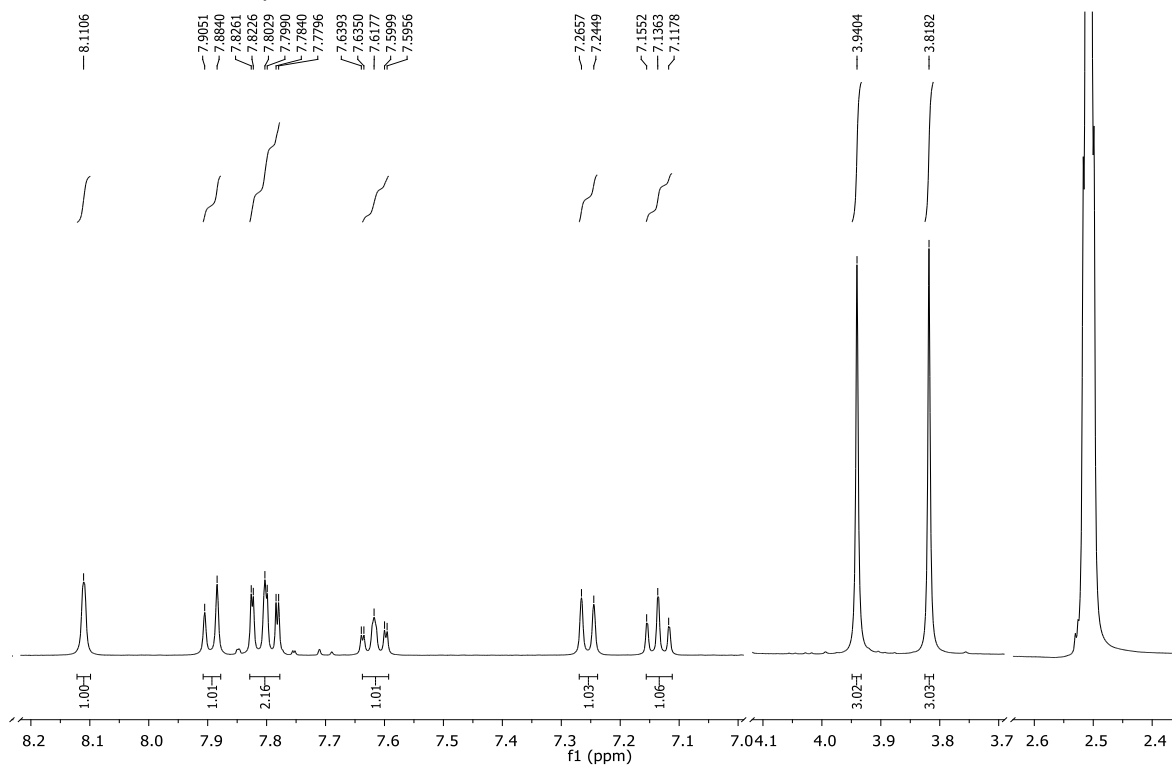

**Figure S49.**  $^1\text{H}$  NMR spectrum (DMSO- $d_6$ , 400 MHz) of *N*-(6-cyano-1-methyl-1H-benzod[imidazol-2-yl)-2-methoxybenzamide **33**

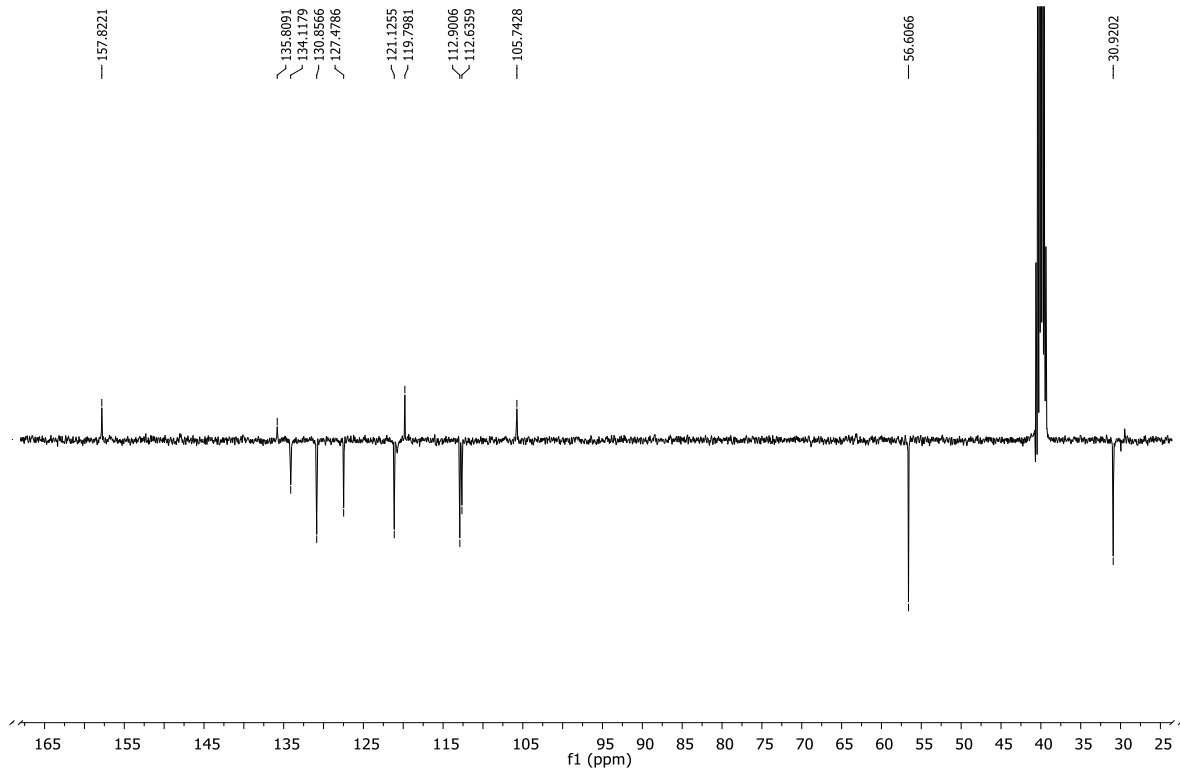

**Figure S50.**  $^{13}\text{C}$  NMR spectrum (DMSO- $d_6$ , 101 MHz) of *N*-(6-cyano-1-methyl-1H-benzo[d]imidazol-2-yl)-2-methoxybenzamide **33**

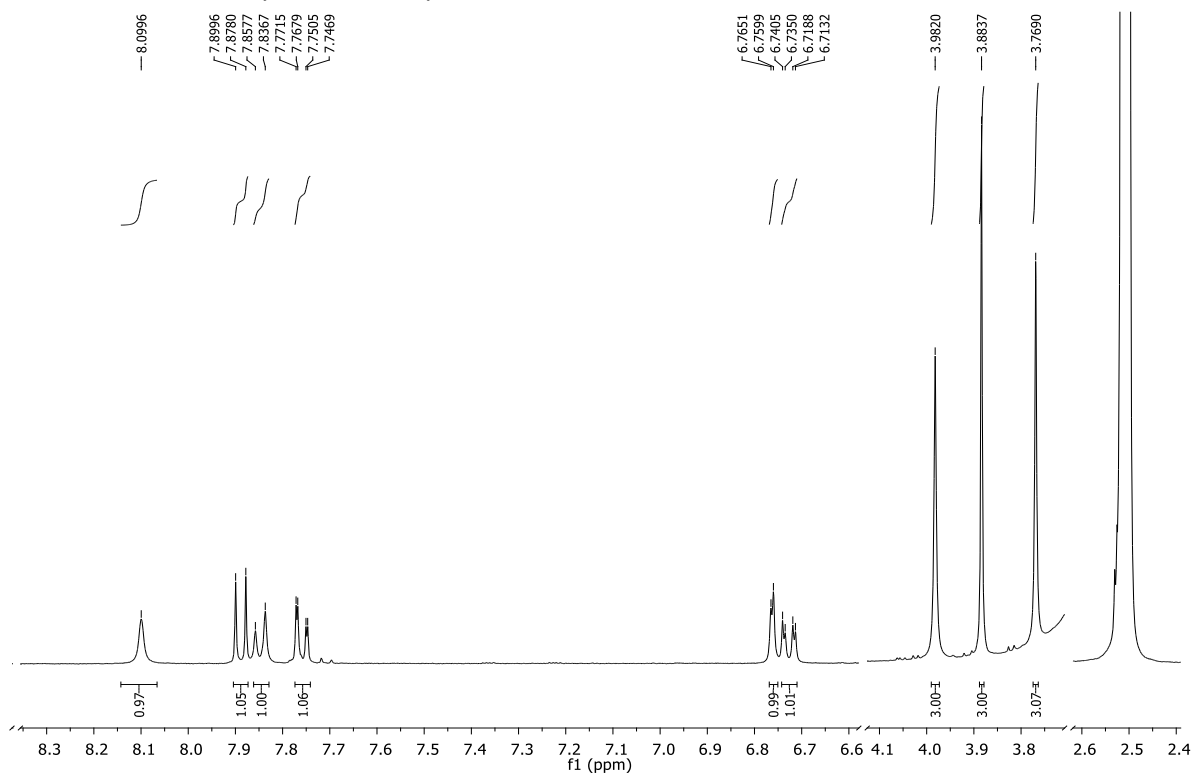

**Figure S51.**  $^1\text{H}$  NMR spectrum (DMSO- $d_6$ , 400 MHz) of *N*-(6-cyano-1-methyl-1H-benzo[d]imidazol-2-yl)-2,4-dimethoxybenzamide **34**

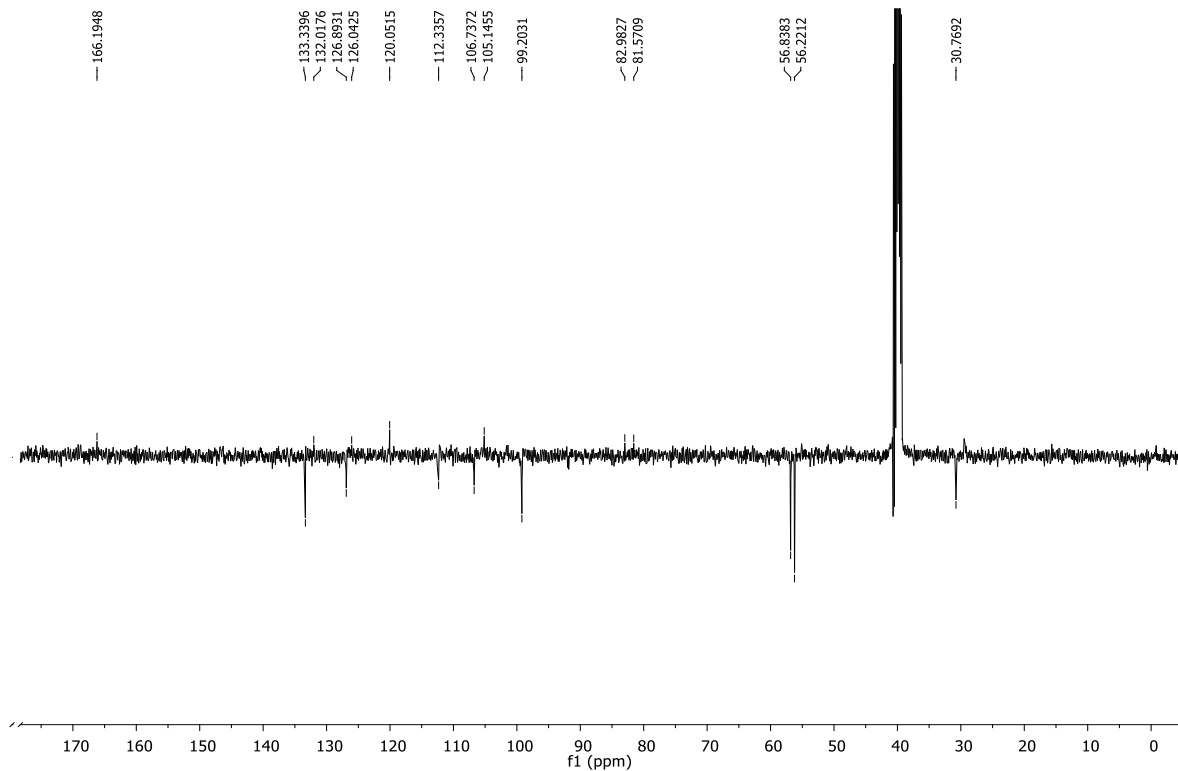

**Figure S52.**  $^{13}\text{C}$  NMR spectrum (DMSO- $d_6$ , 101 MHz) of *N*-(6-cyano-1-methyl-1H-benzo[d]imidazol-2-yl)-2,4-dimethoxybenzamide **34**

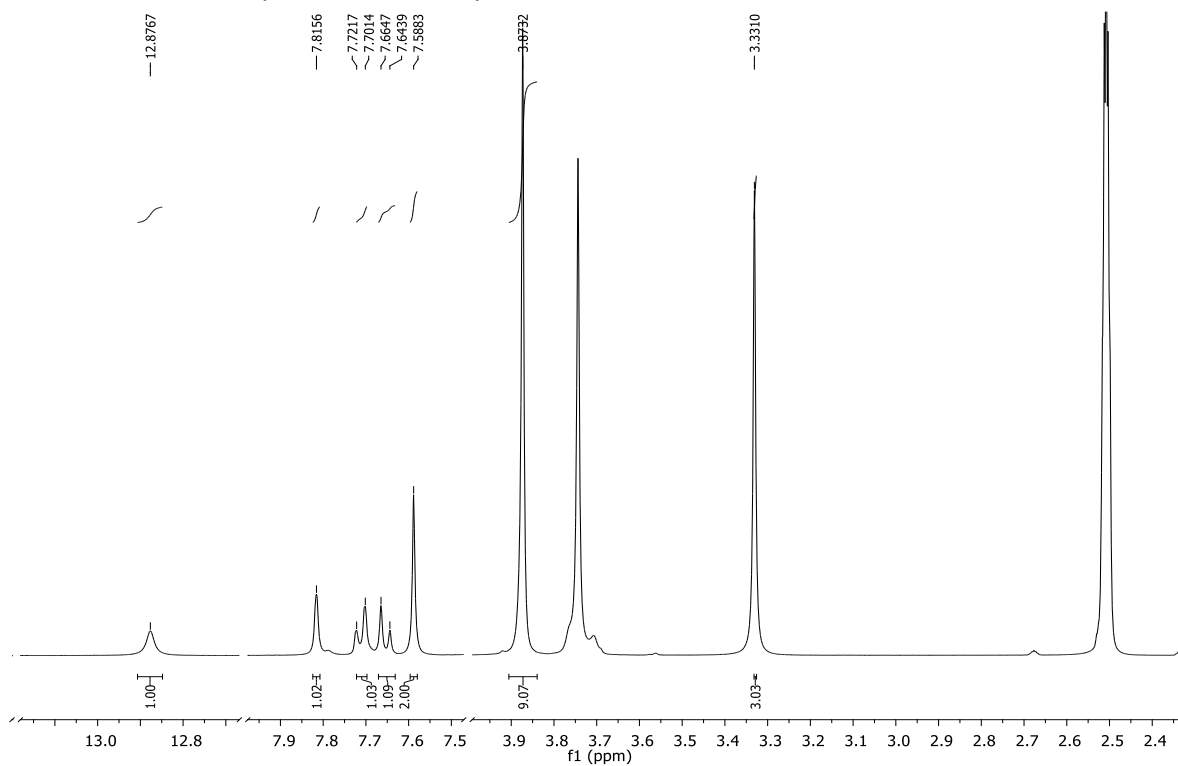

**Figure S53.**  $^1\text{H}$  NMR spectrum (DMSO- $d_6$ , 400 MHz) of *N*-(6-cyano-1-methyl-1H-benzo[d]imidazol-2-yl)-3,4,5-trimethoxybenzamide **35**

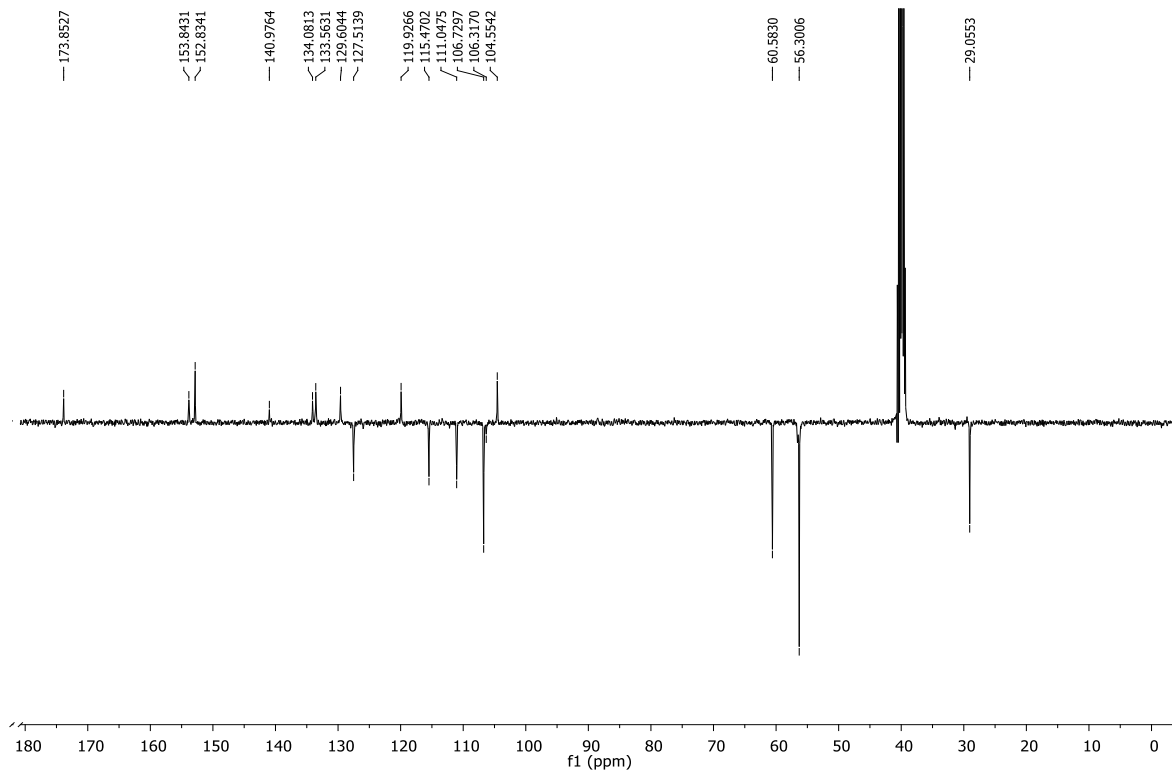

**Figure S54.**  $^{13}\text{C}$  NMR spectrum (DMSO- $d_6$ , 101 MHz) of *N*-(6-cyano-1-methyl-1H-benzo[d]imidazol-2-yl)-3,4,5-trimethoxybenzamide **35**

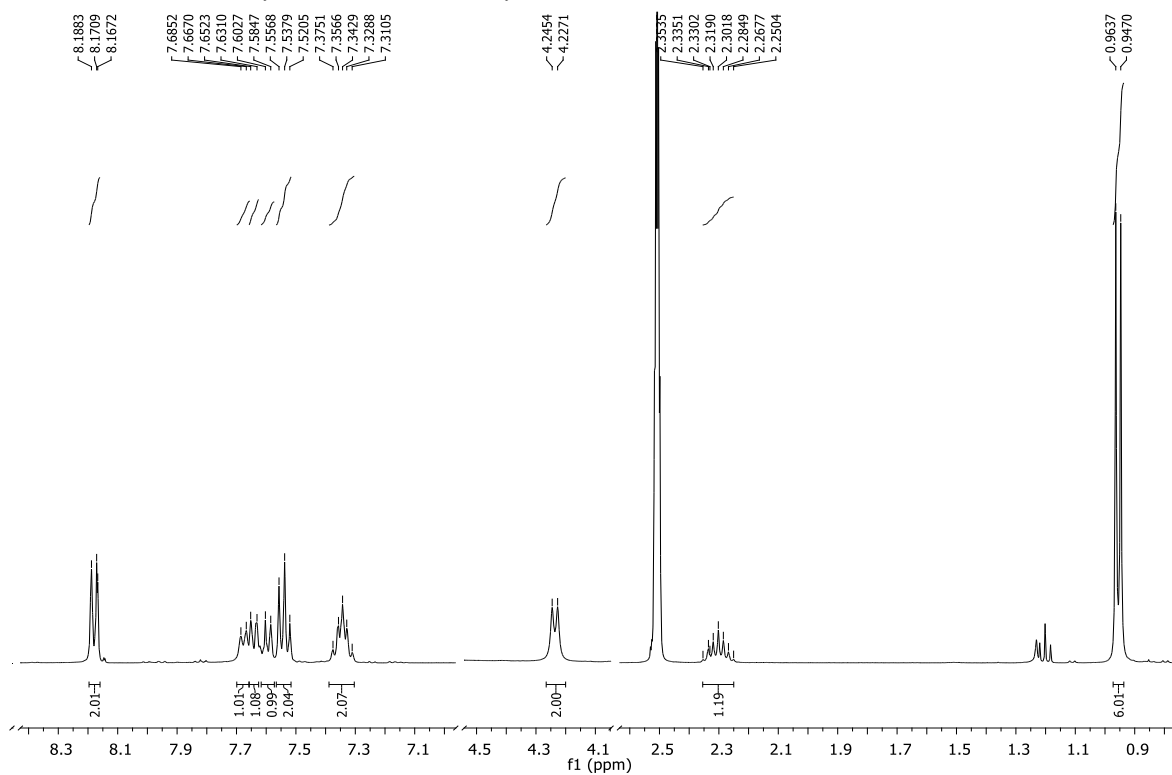

**Figure S55.**  $^1\text{H}$  NMR spectrum (DMSO- $d_6$ , 400 MHz) of *N*-(1-isobutyl-1H-benzo[d]imidazol-2-yl)benzamide **36**

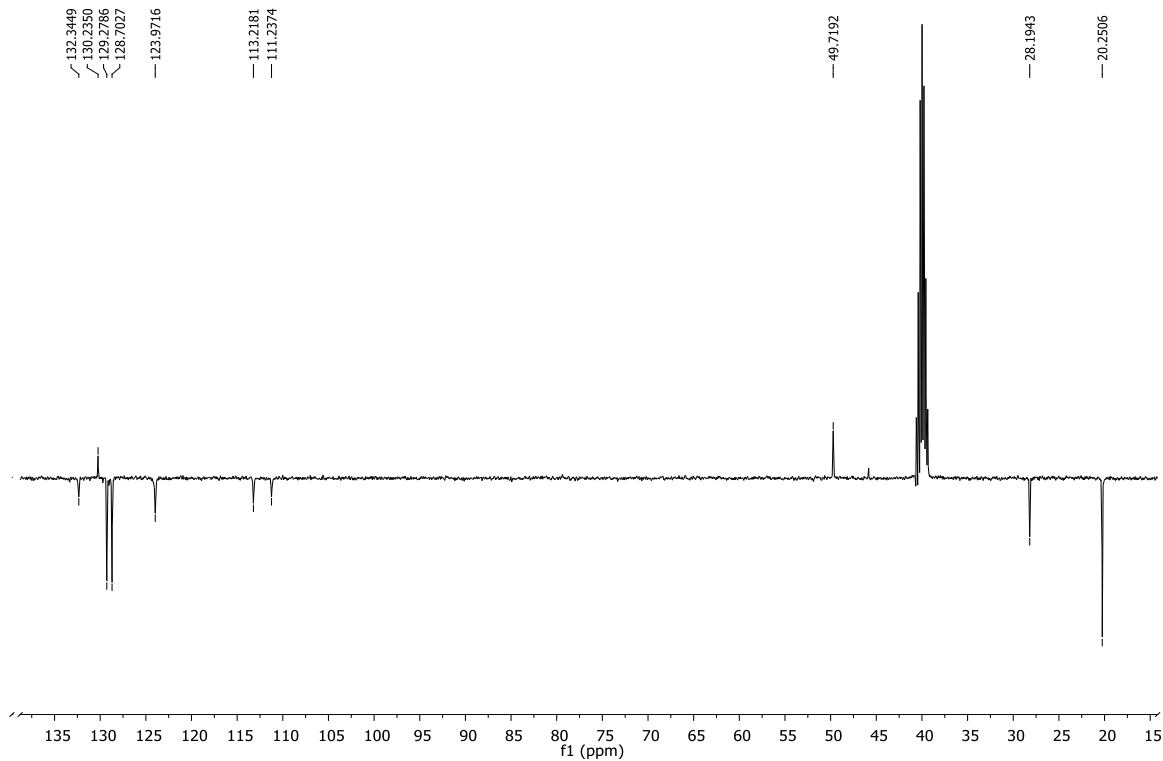

**Figure S56.**  $^{13}\text{C}$  NMR spectrum (DMSO- $d_6$ , 101 MHz) of *N*-(1-isobutyl-1H-benzo[d]imidazol-2-yl)benzamide **36**

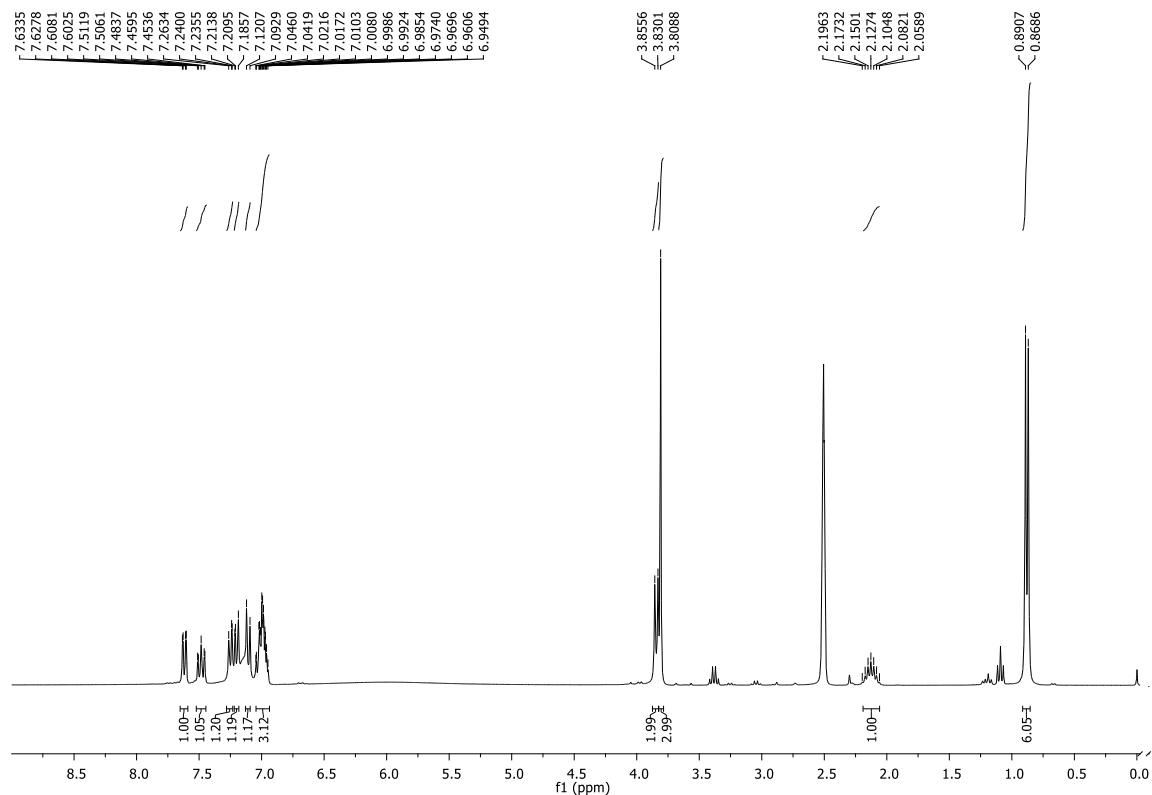

**Figure S57.**  $^1\text{H}$  NMR spectrum (DMSO- $d_6$ , 300 MHz) of *N*-(1-isobutyl-1H-benzo[d]imidazol-2-yl)-2-methoxybenzamide **37**

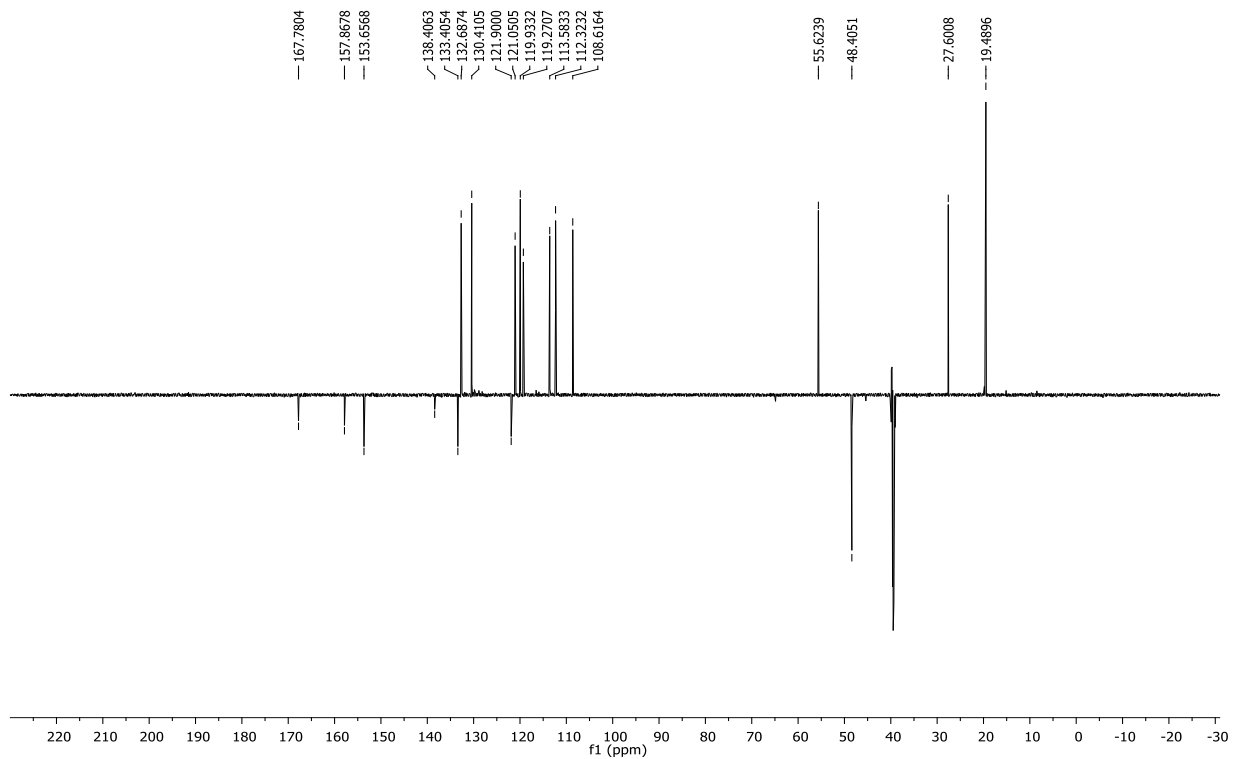

**Figure S58.**  $^{13}\text{C}$  NMR spectrum (DMSO- $d_6$ , 151 MHz) of *N*-(1-isobutyl-1H-benzo[d]imidazol-2-yl)-2-methoxybenzamide **37**

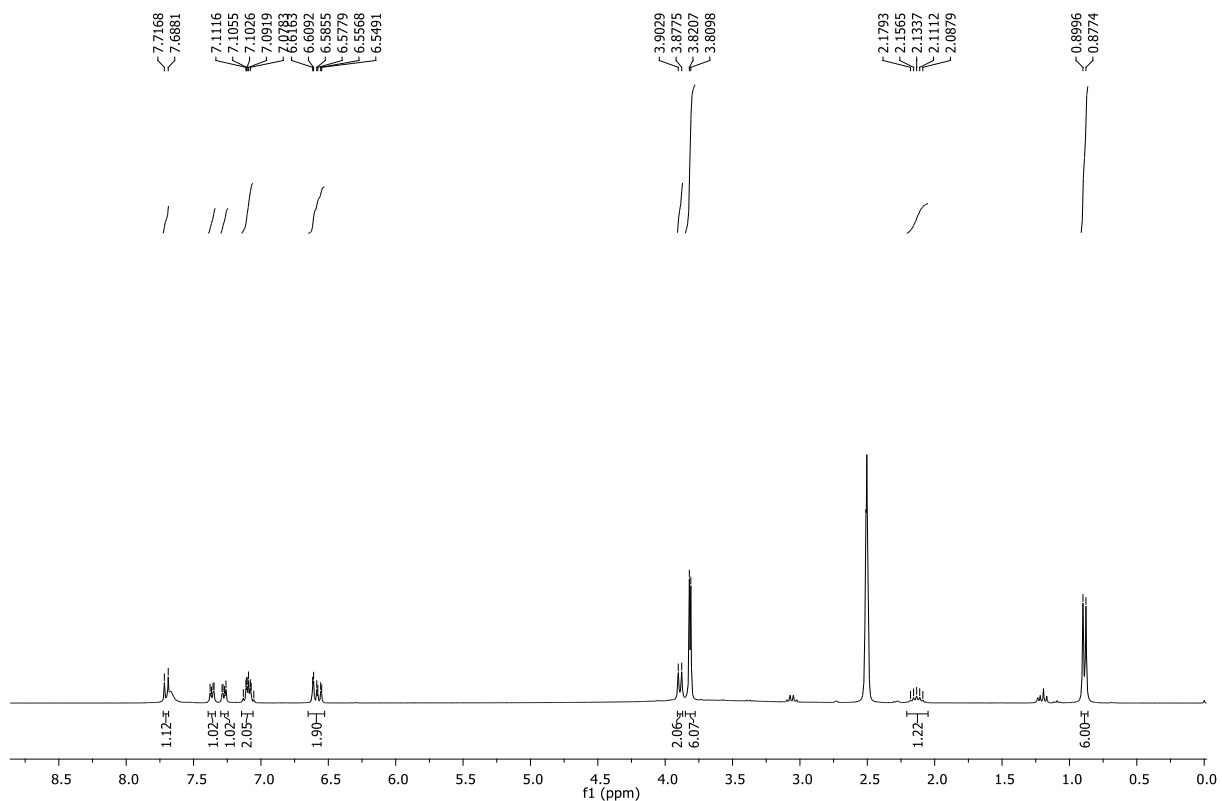

**Figure S59.**  $^1\text{H}$  NMR spectrum (DMSO- $d_6$ , 300 MHz) of *N*-(1-isobutyl-1H-benzo[d]imidazol-2-yl)-2,4-dimethoxybenzamide **38**



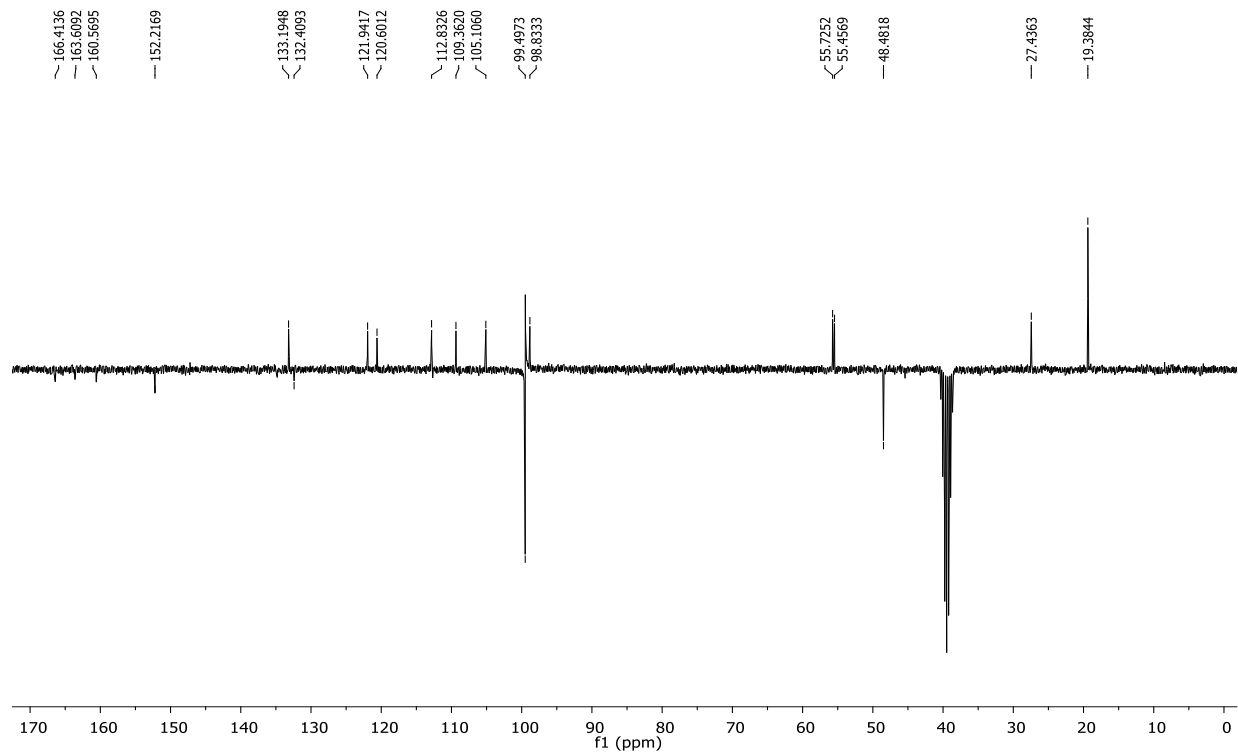

**Figure S60.**  $^{13}\text{C}$  NMR spectrum (DMSO- $d_6$ , 75 MHz) of *N*-(1-isobutyl-1H-benzo[d]imidazol-2-yl)-2,4-dimethoxybenzamide **38**

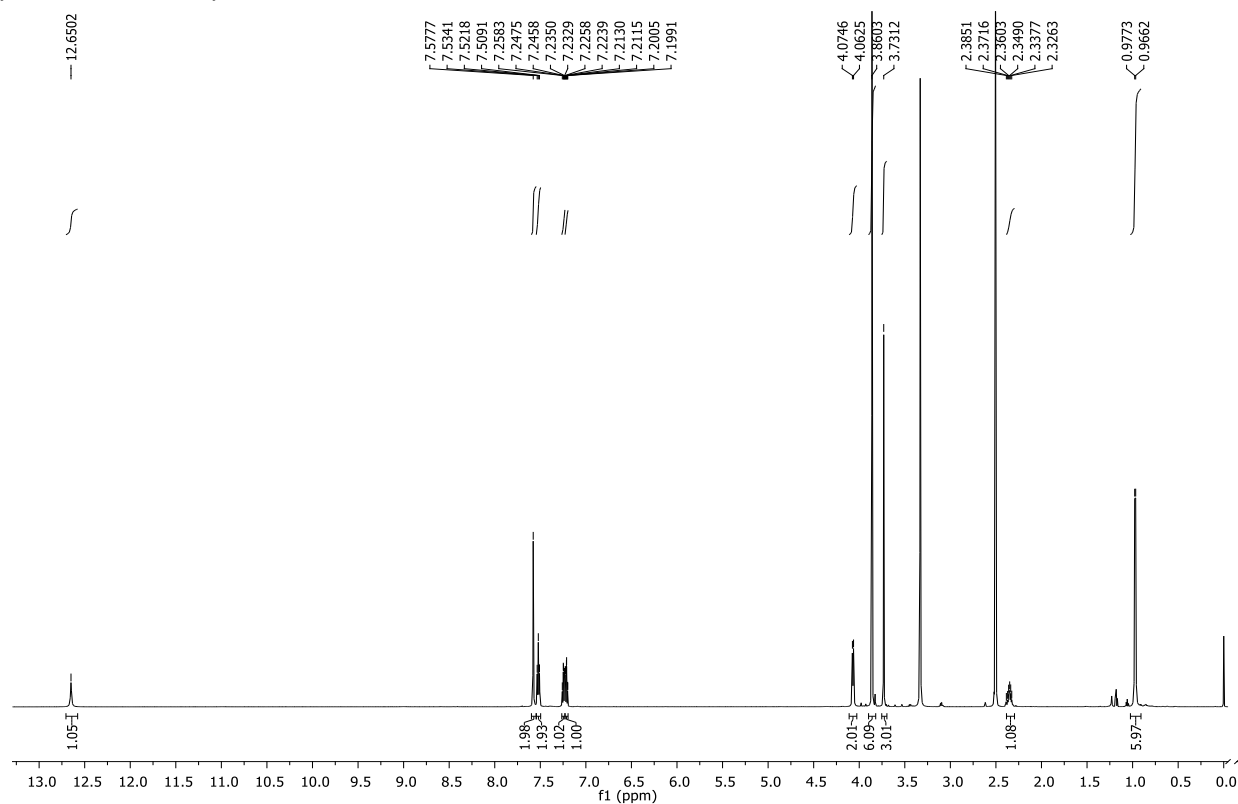

**Figure S61.**  $^1\text{H}$  NMR spectrum (DMSO- $d_6$ , 600 MHz) of *N*-(1-isobutyl-1H-benzo[d]imidazol-2-yl)-3,4,5-trimethoxybenzamide **39**

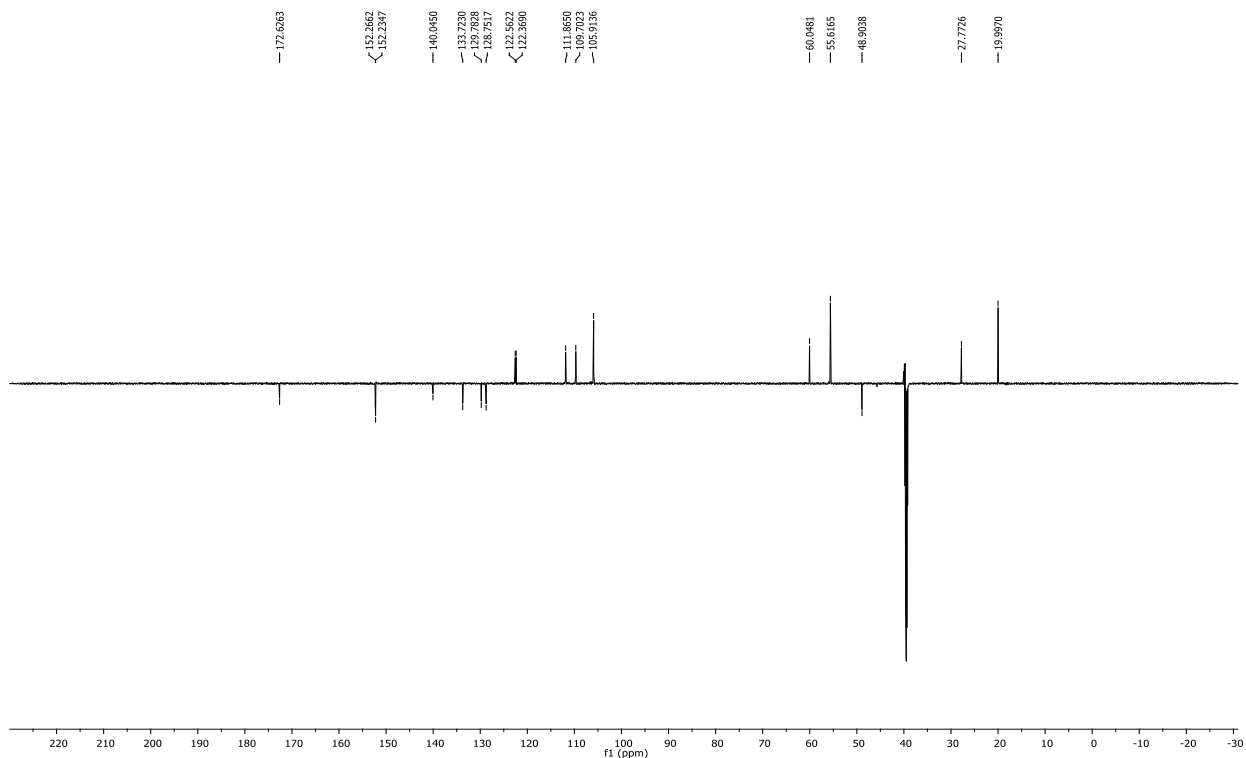

**Figure S62.**  $^{13}\text{C}$  NMR spectrum (DMSO- $d_6$ , 151 MHz) of *N*-(1-isobutyl-1H-benzo[d]imidazol-2-yl)-3,4,5-trimethoxybenzamide **39**

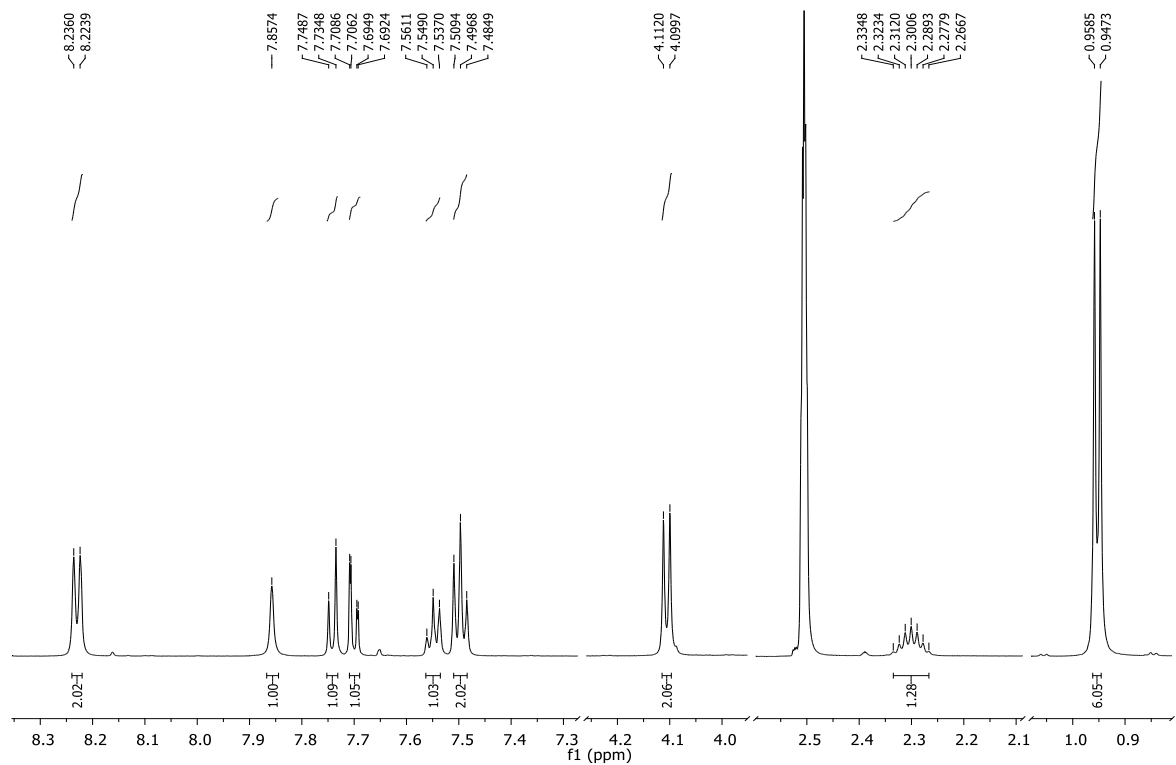

**Figure S63.**  $^1\text{H}$  NMR spectrum (DMSO- $d_6$ , 600 MHz) of *N*-(6-cyano-1-isobutyl-1H-benzo[d]imidazol-2-yl)benzamide **40**

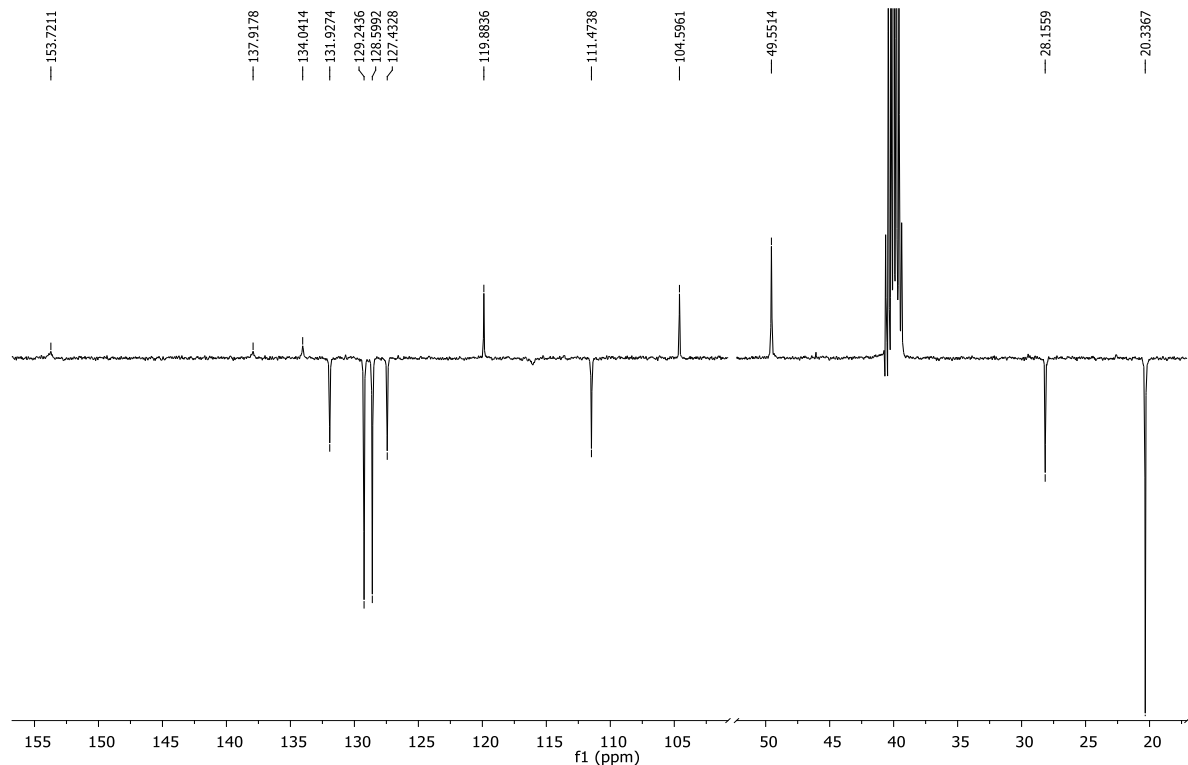

**Figure S64.**  $^{13}\text{C}$  NMR spectrum (DMSO- $d_6$ , 101 MHz) of *N*-(6-cyano-1-isobutyl-1H-benzo[d]imidazol-2-yl)benzamide **40**

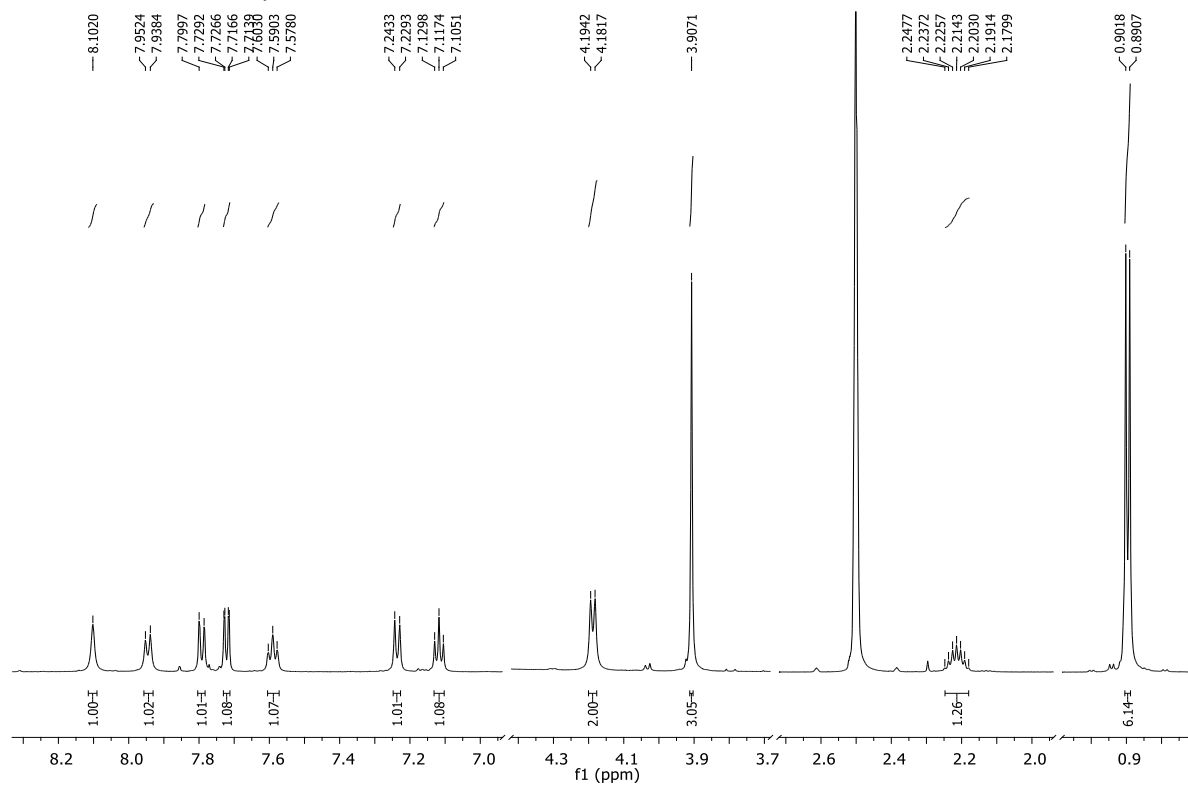

**Figure S65.**  $^1\text{H}$  NMR spectrum (DMSO- $d_6$ , 600 MHz) of *N*-(6-cyano-1-isobutyl-1H-benzo[d]imidazol-2-yl)-2-methoxybenzamide **41**

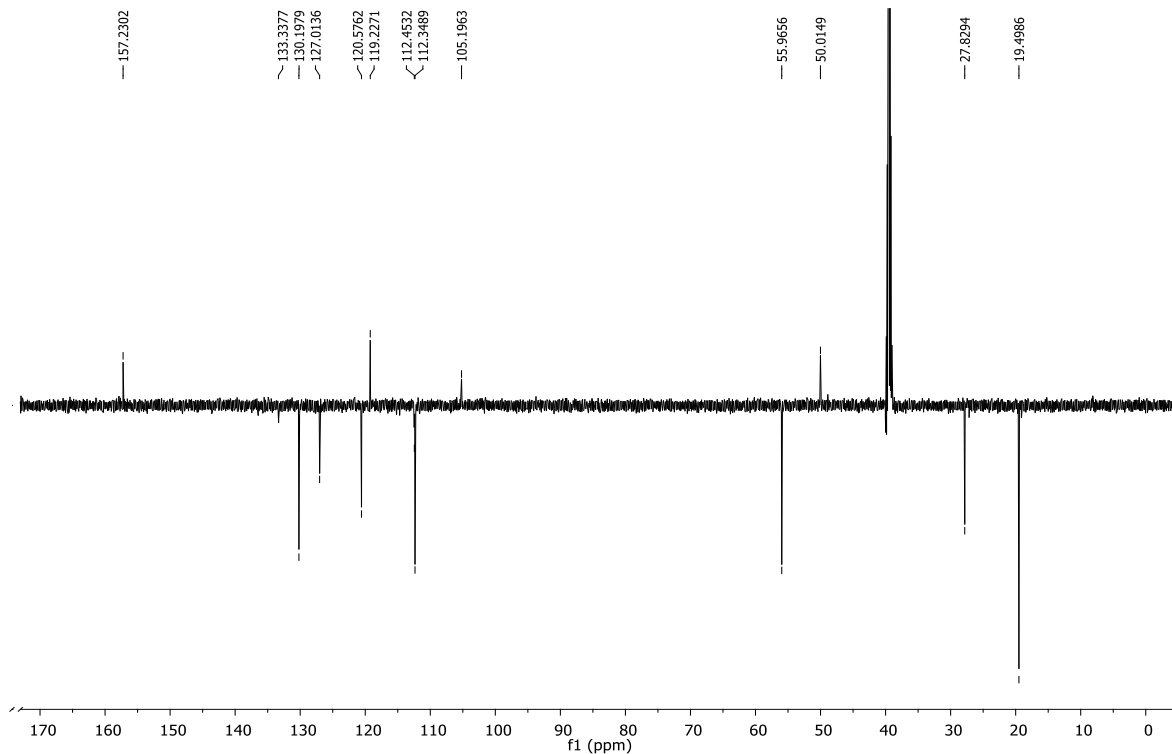

**Figure S66.**  $^{13}\text{C}$  NMR spectrum (DMSO- $d_6$ , 151 MHz) of *N*-(6-cyano-1-isobutyl-1H-benzod[imidazol-2-yl)-2-methoxybenzamide **41**

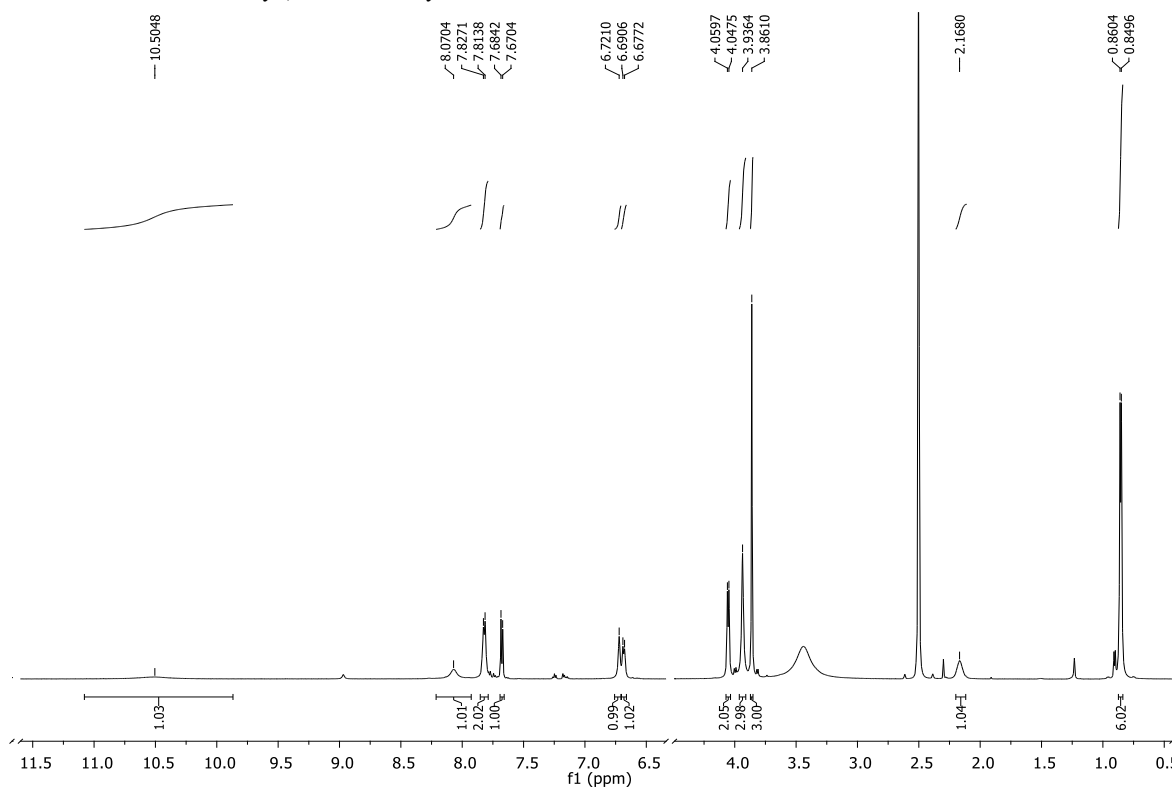

**Figure S67.**  $^1\text{H}$  NMR spectrum (DMSO- $d_6$ , 300 MHz) of *N*-(6-cyano-1-isobutyl-1H-benzod[imidazol-2-yl)-2,4-dimethoxybenzamide **42**

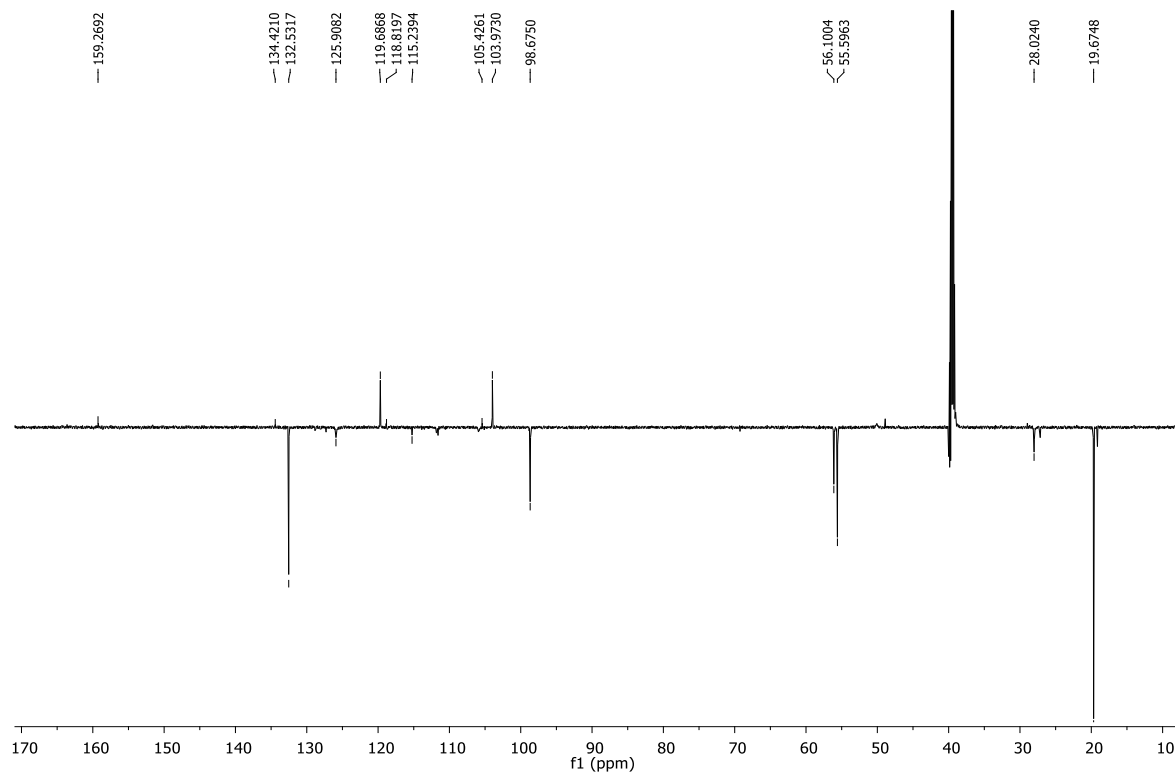

**Figure S68.**  $^{13}\text{C}$  NMR spectrum (DMSO- $d_6$ , 75 MHz) of *N*-(6-cyano-1-isobutyl-1H-benzodimidazol-2-yl)-2,4-dimethoxybenzamide **42**

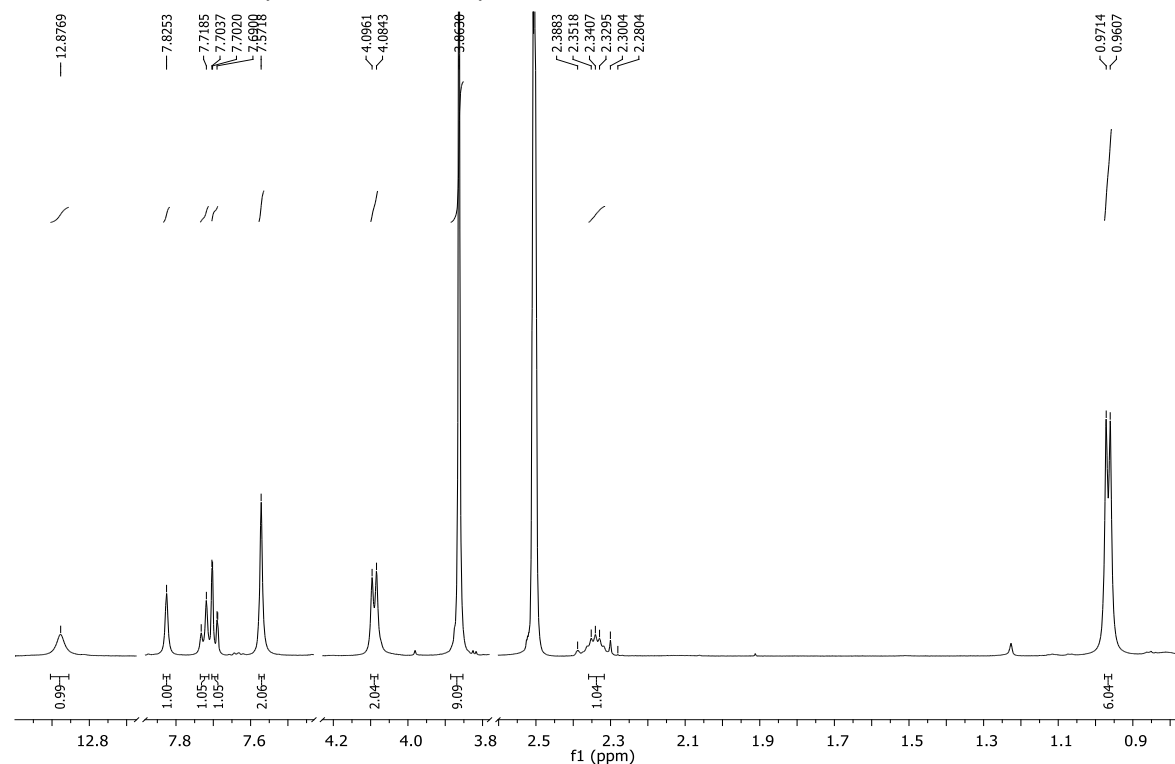

**Figure S69.**  $^1\text{H}$  NMR spectrum (DMSO- $d_6$ , 600 MHz) of *N*-(6-cyano-1-isobutyl-1H-benzodimidazol-2-yl)-3,4,5-trimethoxybenzamide **43**

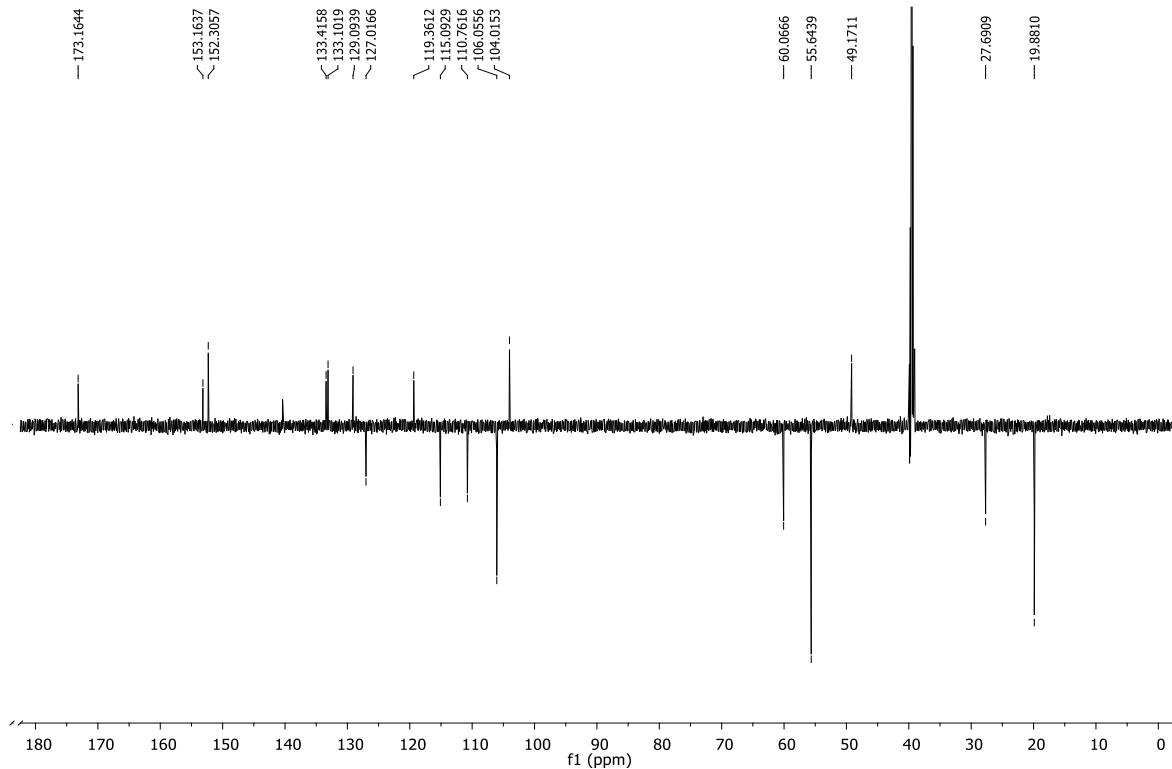

**Figure S70.**  $^{13}\text{C}$  NMR spectrum (DMSO- $d_6$ , 151 MHz) of *N*-(6-cyano-1-isobutyl-1H-benzo[d]imidazol-2-yl)-3,4,5-trimethoxybenzamide **43**

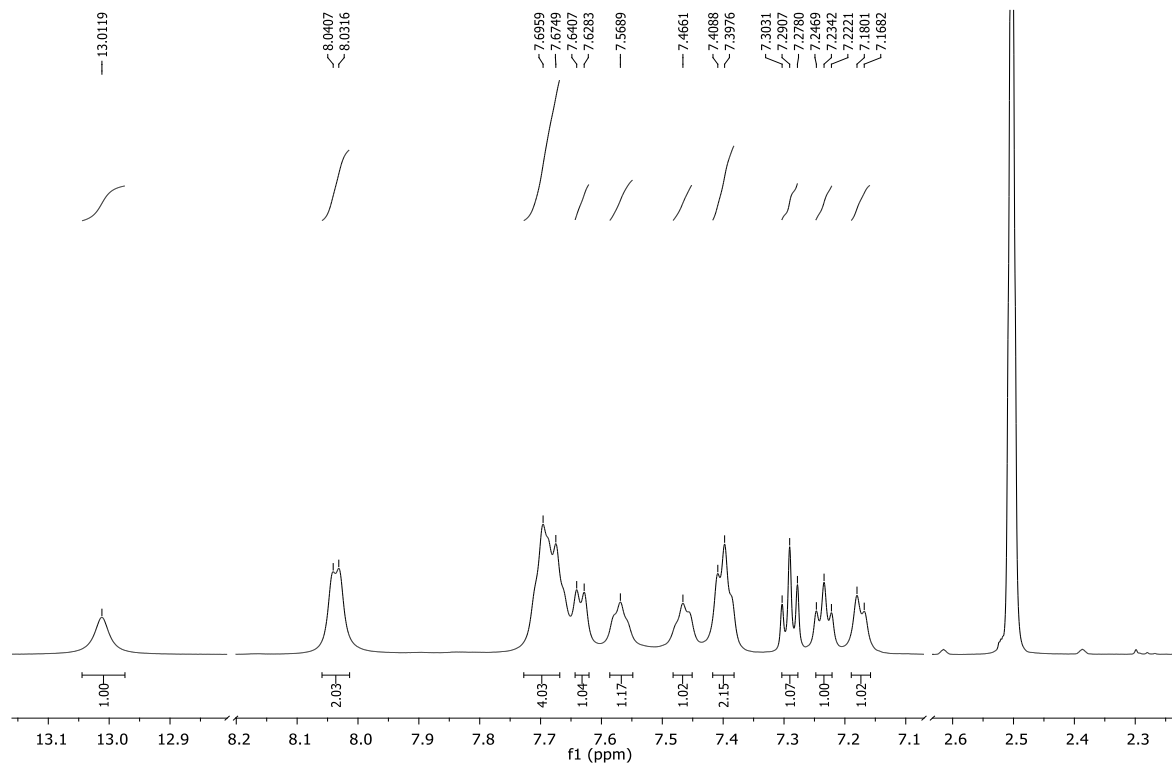

**Figure S71.**  $^1\text{H}$  NMR spectrum (DMSO- $d_6$ , 600 MHz) of *N*-(1-phenyl-1H-benzo[d]imidazol-2-yl)benzamide **44**

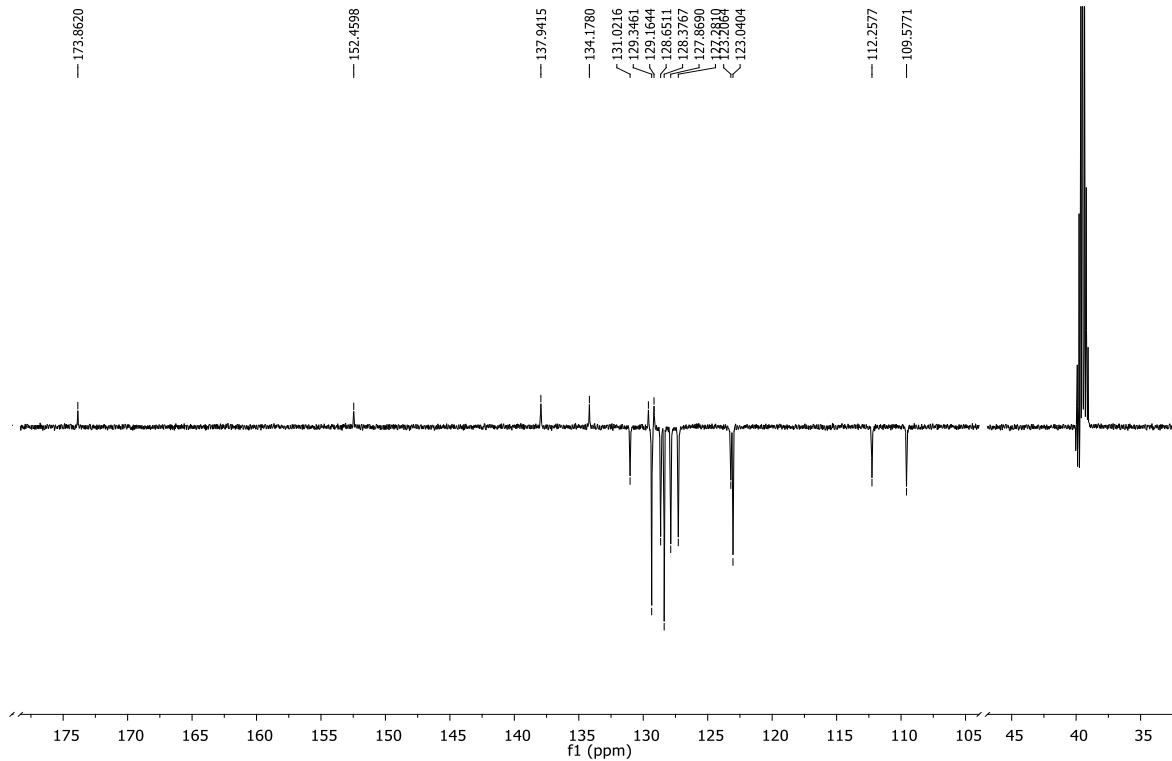

**Figure S72.**  $^{13}\text{C}$  NMR spectrum (DMSO- $d_6$ , 151 MHz) of *N*-(1-phenyl-1H-benzo[d]imidazol-2-yl)benzamide **44**

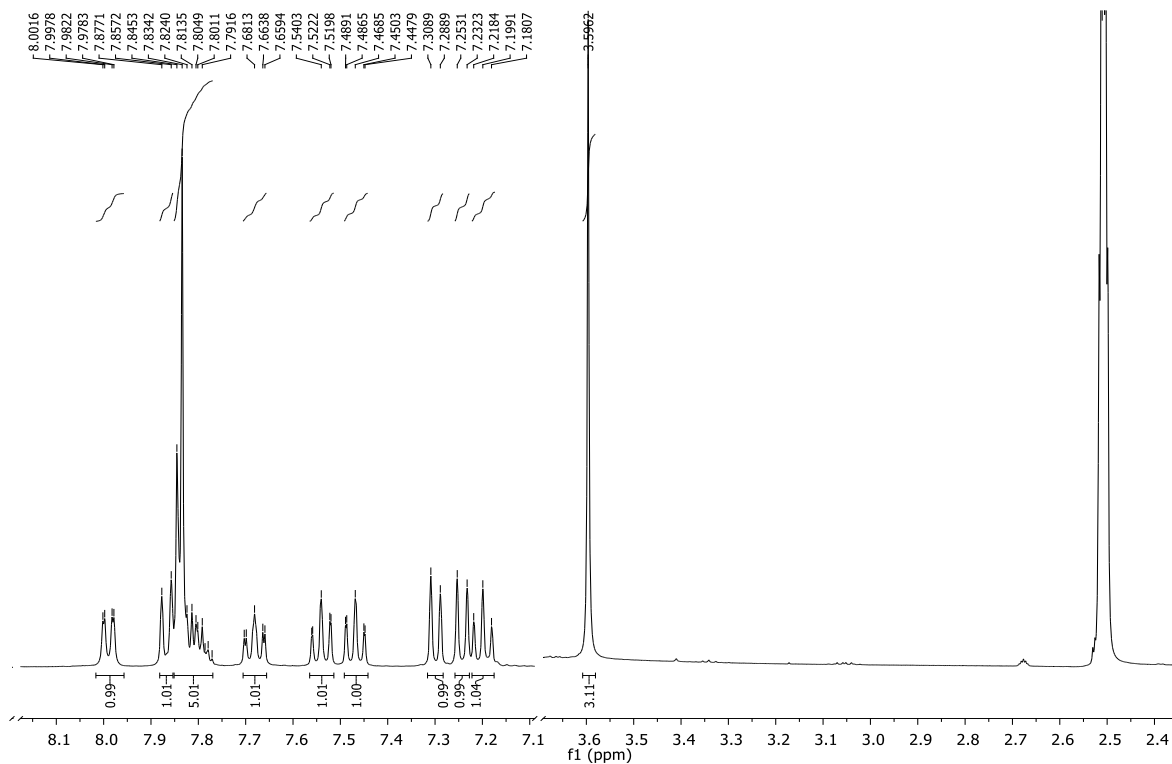

**Figure S73.**  $^1\text{H}$  NMR spectrum (DMSO- $d_6$ , 400 MHz) of 2-methoxy-*N*-(1-phenyl-1H-benzo[d]imidazol-2-yl)benzamide **45**

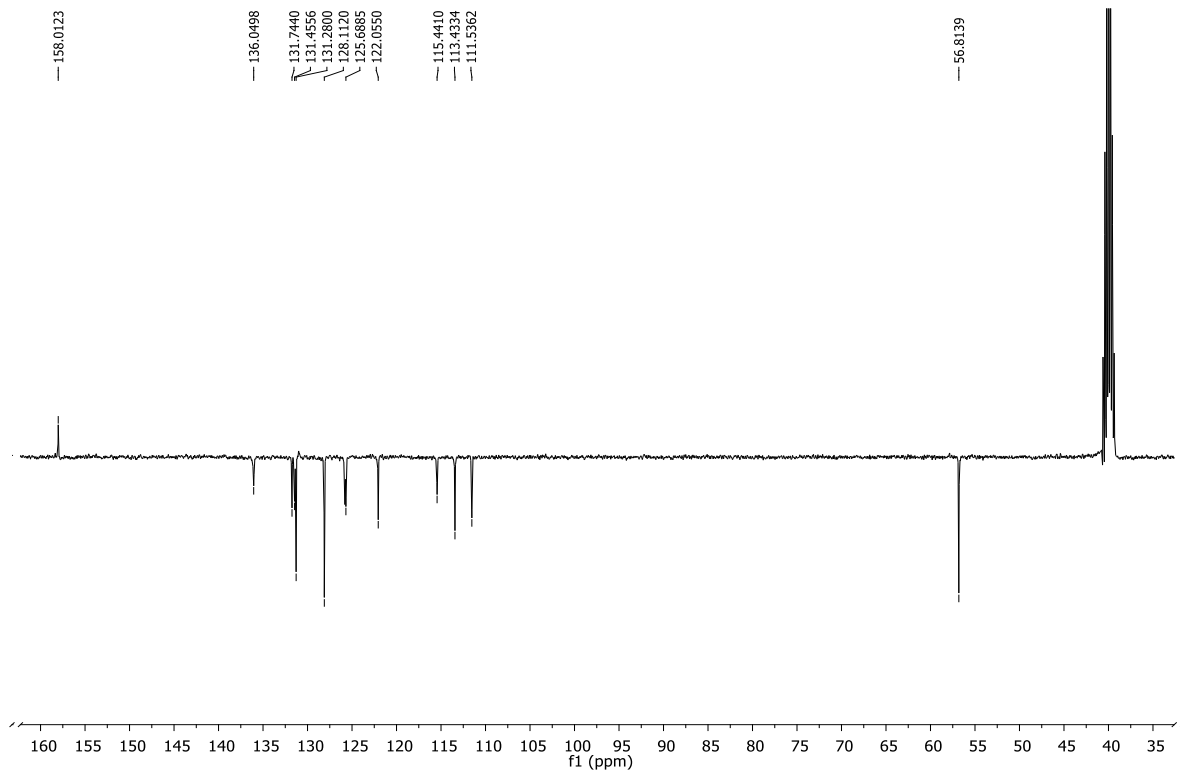

**Figure S74.**  $^{13}\text{C}$  NMR spectrum (DMSO- $d_6$ , 101 MHz) of 2-methoxy-*N*-(1-phenyl-1*H*-benzo[*d*]imidazol-2-yl)benzamide **45**

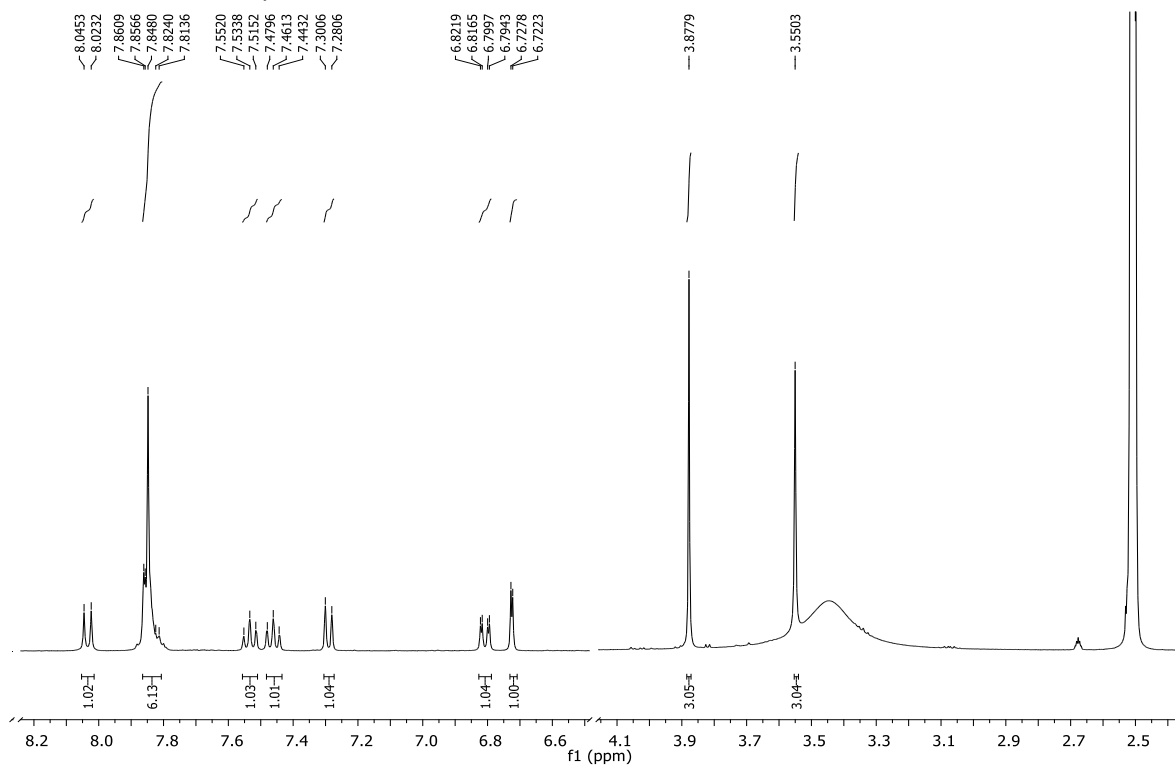

**Figure S75.**  $^1\text{H}$  NMR spectrum (DMSO- $d_6$ , 400 MHz) of 2,4-dimethoxy-*N*-(1-phenyl-1*H*-benzo[*d*]imidazol-2-yl)benzamide **46**



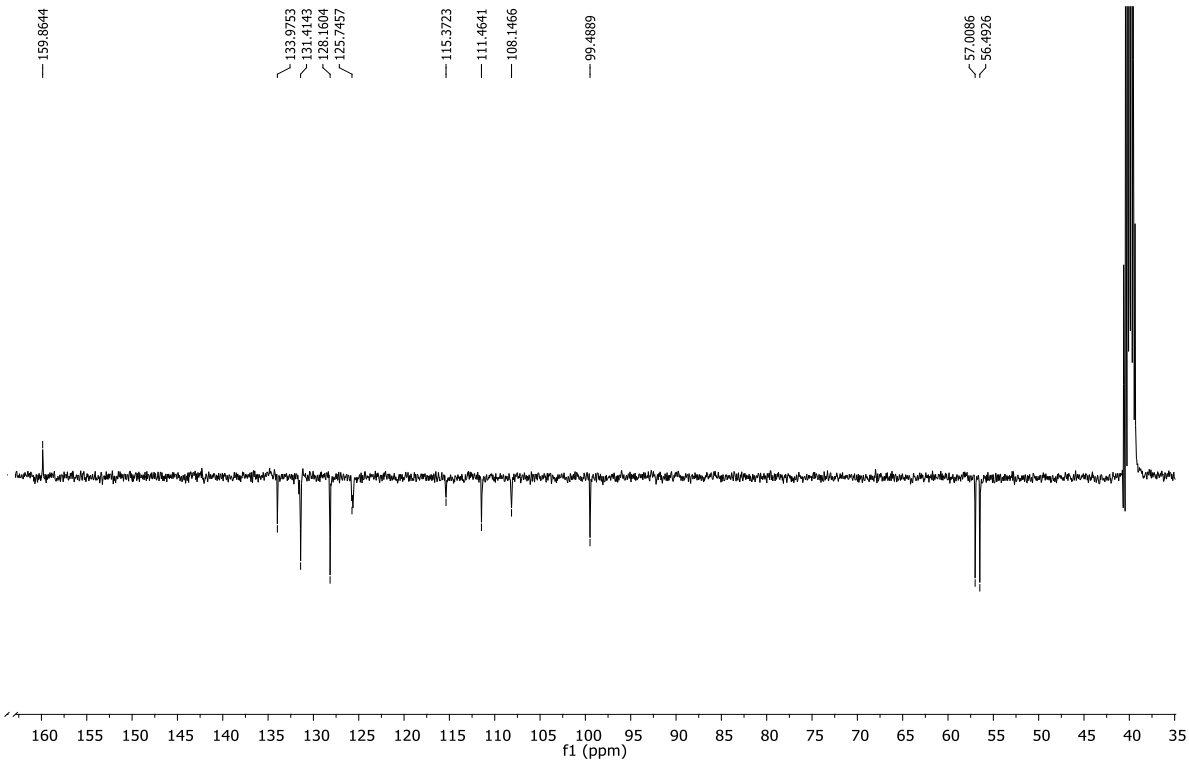

**Figure S76.**  $^{13}\text{C}$  NMR spectrum (DMSO- $d_6$ , 75 MHz) of 2,4-dimethoxy-*N*-(1-phenyl-1*H*-benzo[*d*]imidazol-2-yl)benzamide **46**

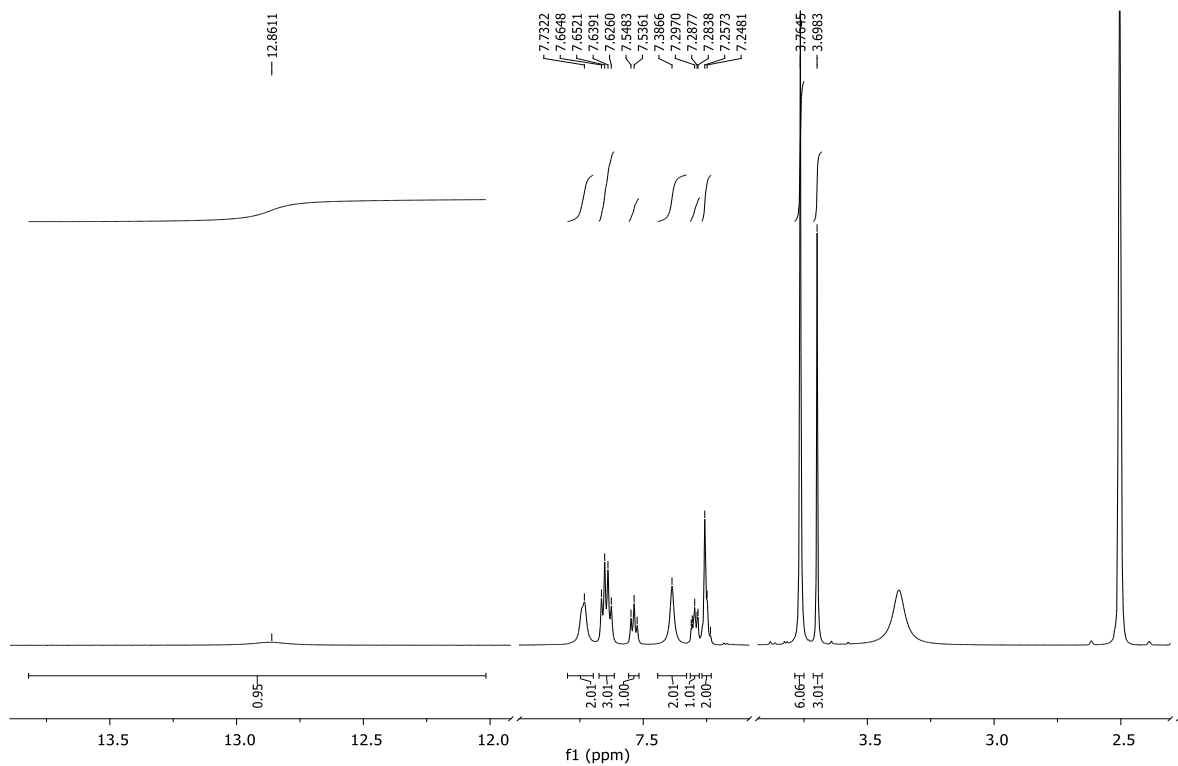

**Figure S77.**  $^1\text{H}$  NMR spectrum (DMSO- $d_6$ , 600 MHz) of 3,4,5-trimethoxy-*N*-(1-phenyl-1*H*-benzo[*d*]imidazol-2-yl)benzamide **47**

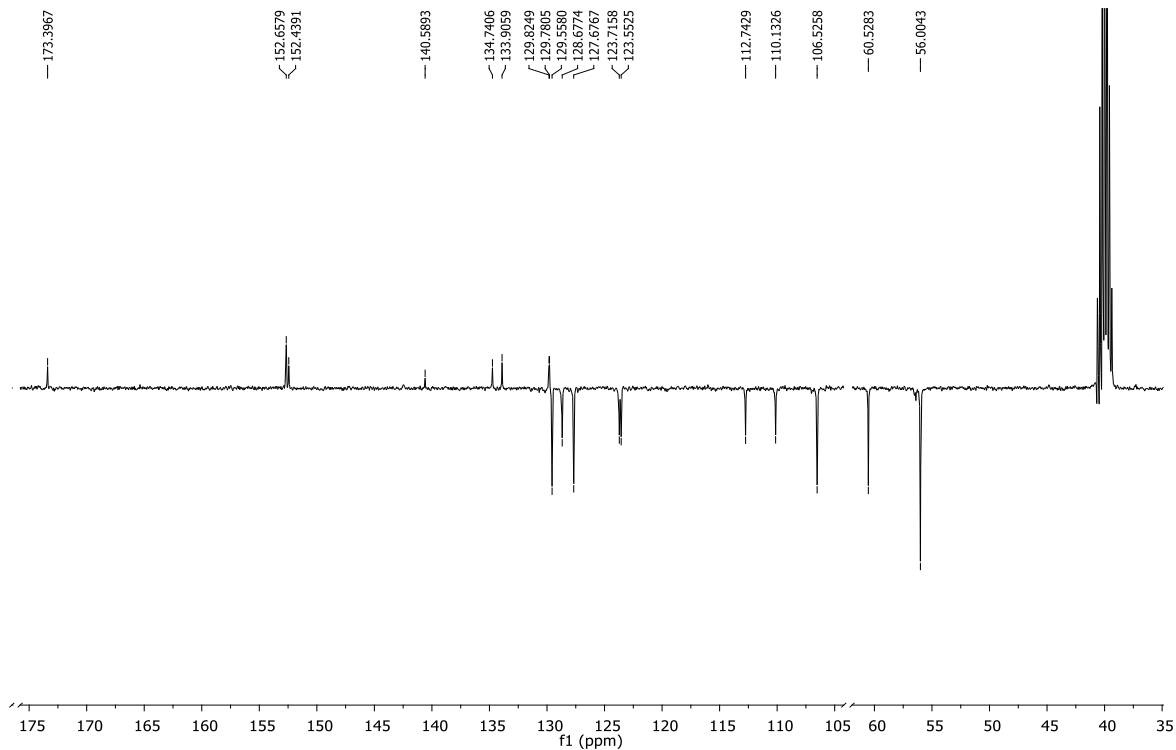

**Figure S78.**  $^{13}\text{C}$  NMR spectrum (DMSO- $d_6$ , 151 MHz) of 3,4,5-trimethoxy-*N*-(1-phenyl-1*H*-benzo[*d*]imidazol-2-yl)benzamide **47**

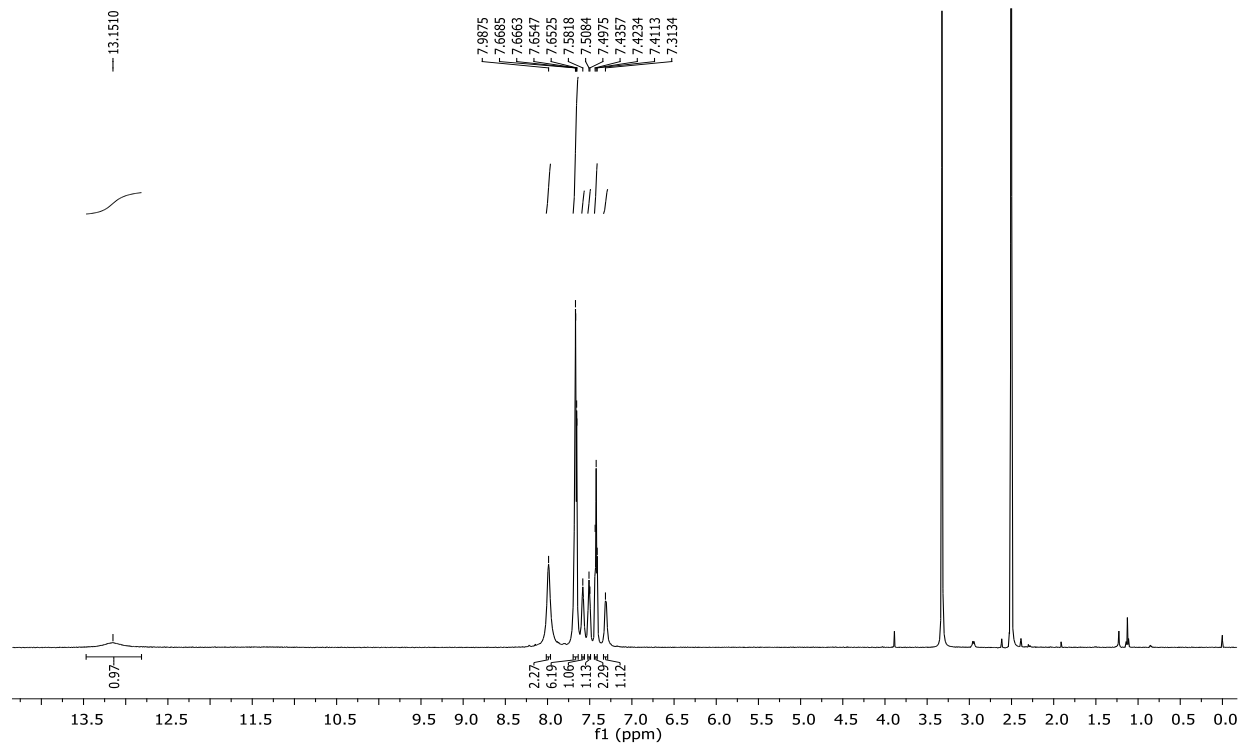

**Figure S79.**  $^1\text{H}$  NMR spectrum (DMSO- $d_6$ , 600 MHz) of *N*-(6-cyano-1-phenyl-1*H*-benzo[*d*]imidazol-2-yl)benzamide **48**

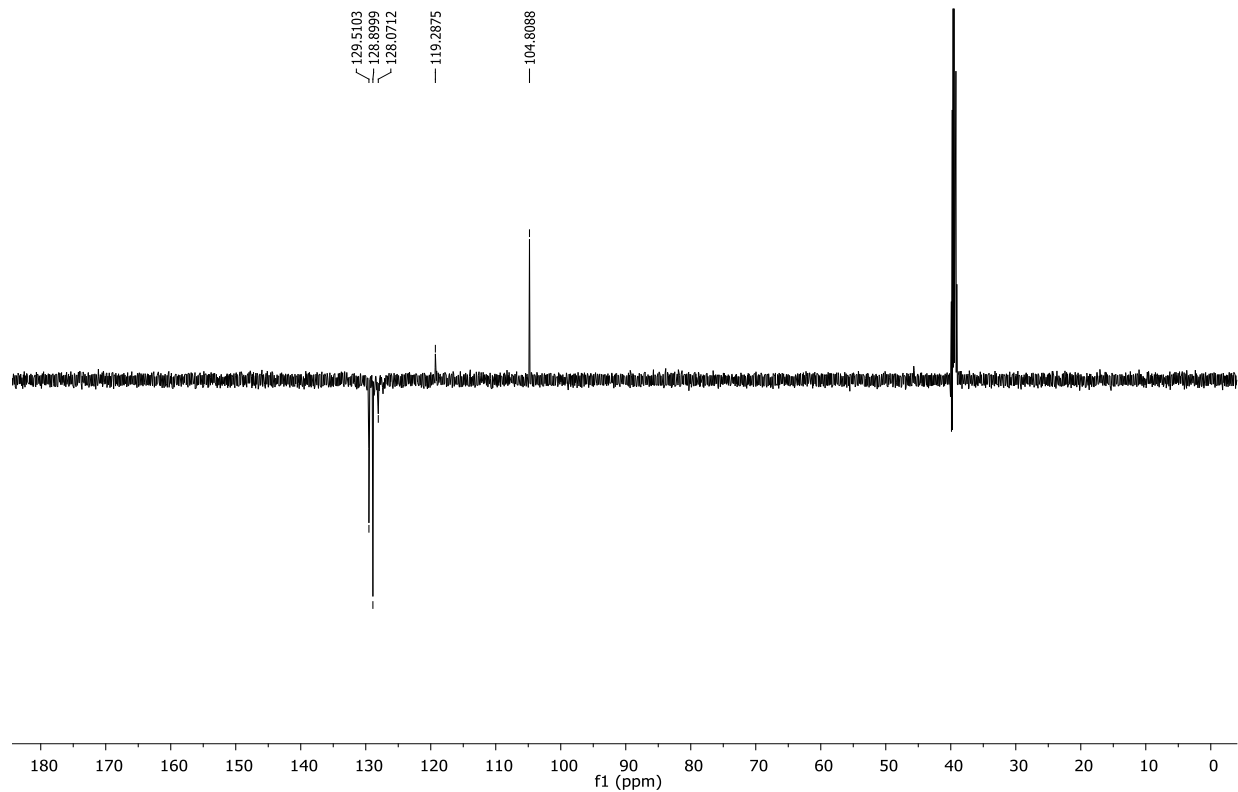

**Figure S80.**  $^{13}\text{C}$  NMR spectrum (DMSO- $d_6$ , 151 MHz) of *N*-(6-cyano-1-phenyl-1H-benzo[d]imidazol-2-yl)benzamide **48**

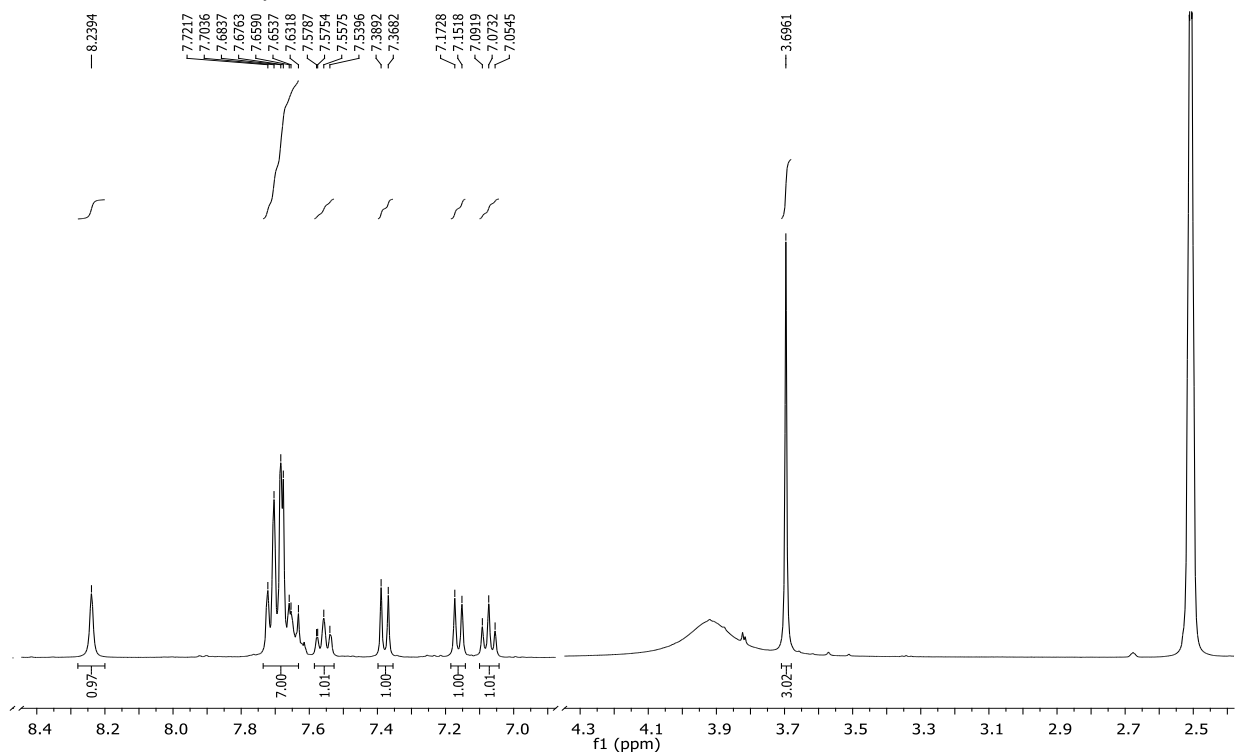

**Figure S81.**  $^1\text{H}$  NMR spectrum (DMSO- $d_6$ , 400 MHz) of *N*-(6-cyano-1-phenyl-1H-benzo[d]imidazol-2-yl)-2-methoxybenzamide **49**

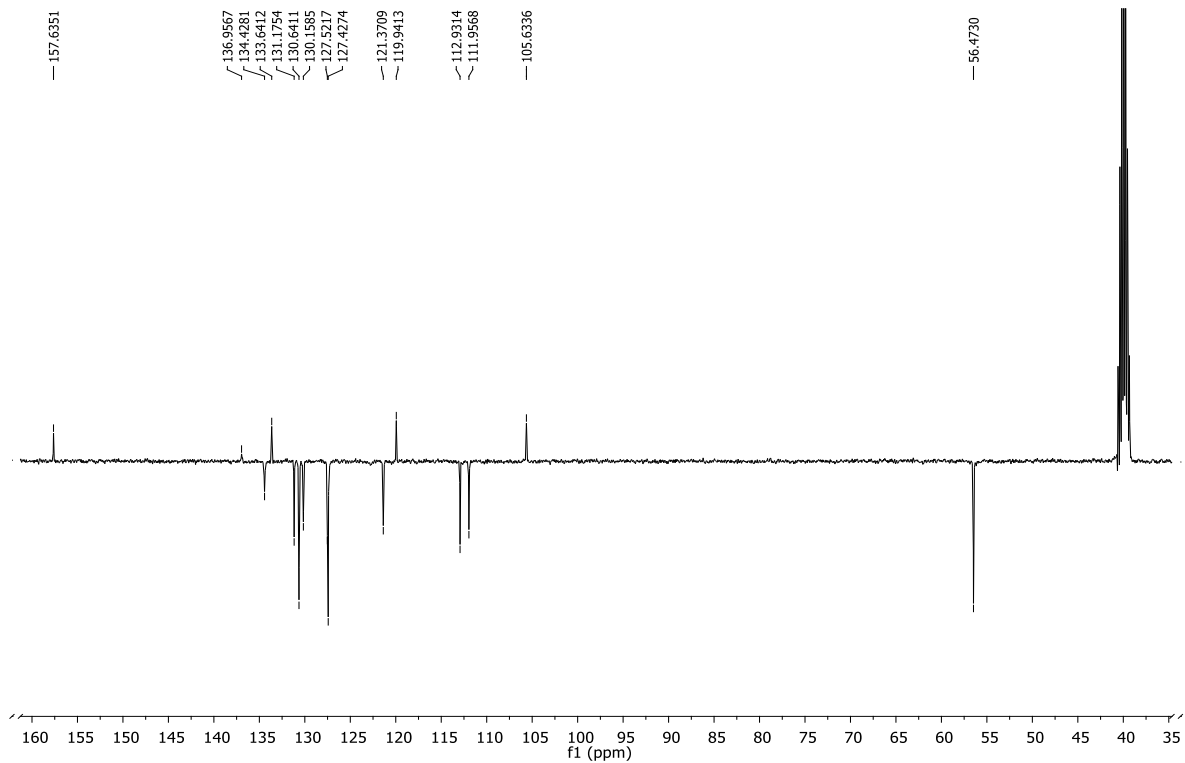

**Figure S82.**  $^{13}\text{C}$  NMR spectrum (DMSO- $d_6$ , 101 MHz) of *N*-(6-cyano-1-phenyl-1H-benzo[*d*]imidazol-2-yl)-2-methoxybenzamide **49**

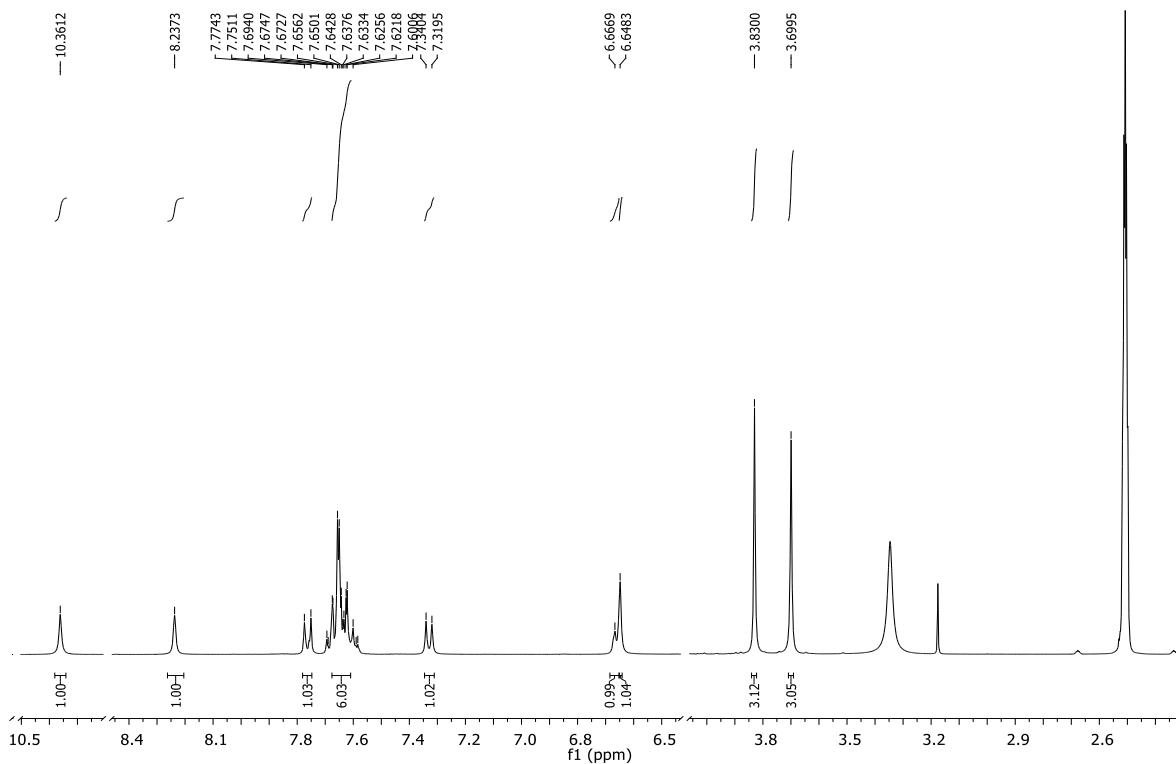

**Figure S83.**  $^1\text{H}$  NMR spectrum (DMSO- $d_6$ , 400 MHz) of *N*-(6-cyano-1-phenyl-1H-benzo[*d*]imidazol-2-yl)-2,4-dimethoxybenzamide **50**

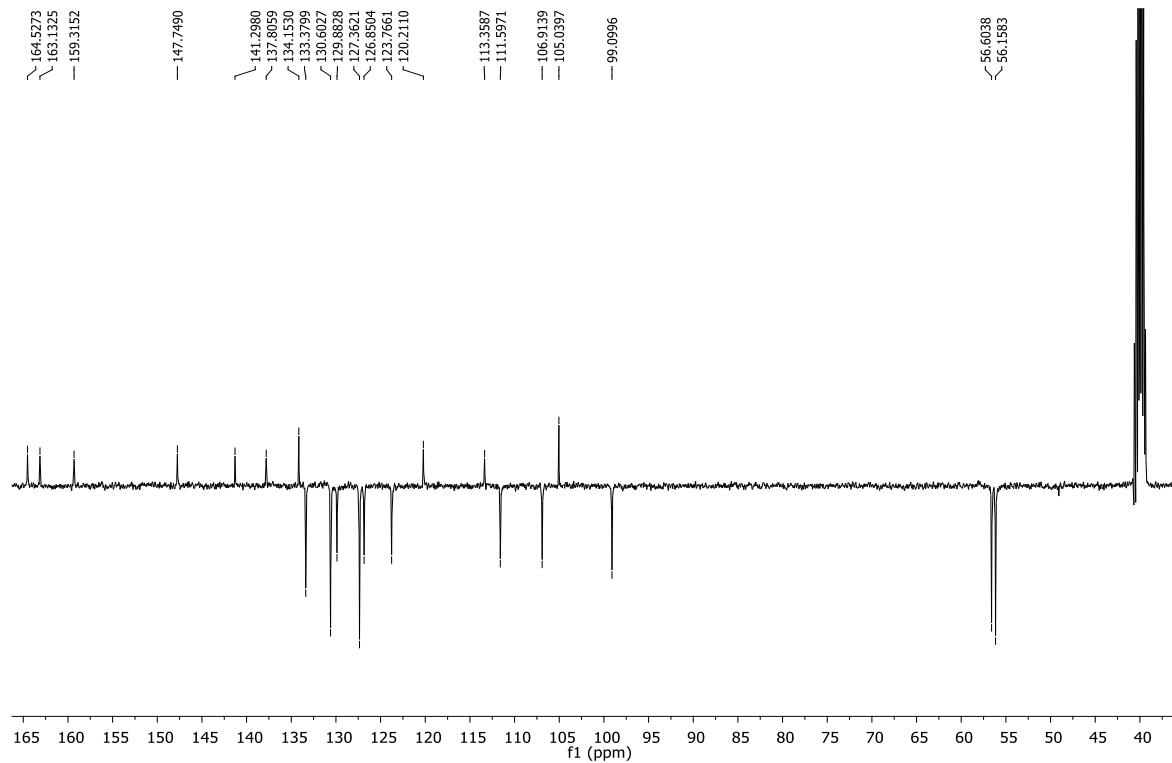

**Figure S84.**  $^{13}\text{C}$  NMR spectrum (DMSO- $d_6$ , 101 MHz) of *N*-(6-cyano-1-phenyl-1H-benzo[d]imidazol-2-yl)-2,4-dimethoxybenzamide **50**

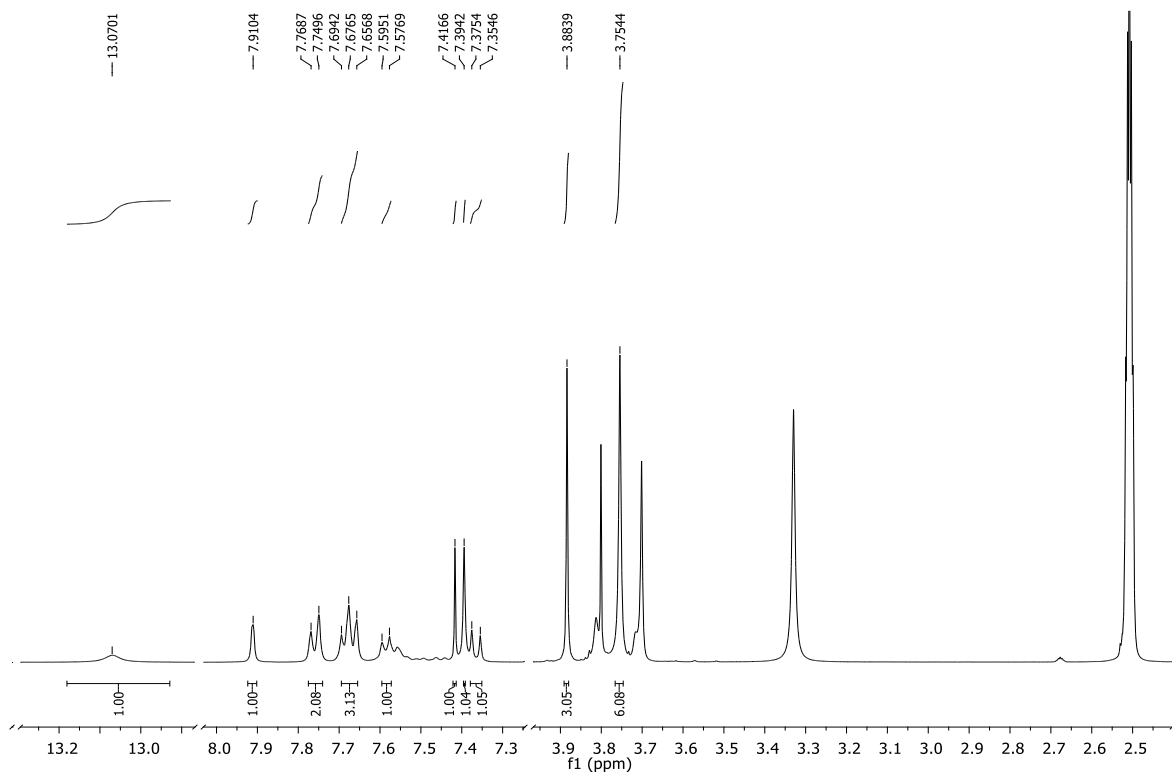

**Figure S85.**  $^1\text{H}$  NMR spectrum (DMSO- $d_6$ , 400 MHz) of *N*-(6-cyano-1-phenyl-1H-benzo[d]imidazol-2-yl)-3,4,5-trimethoxybenzamide **51**

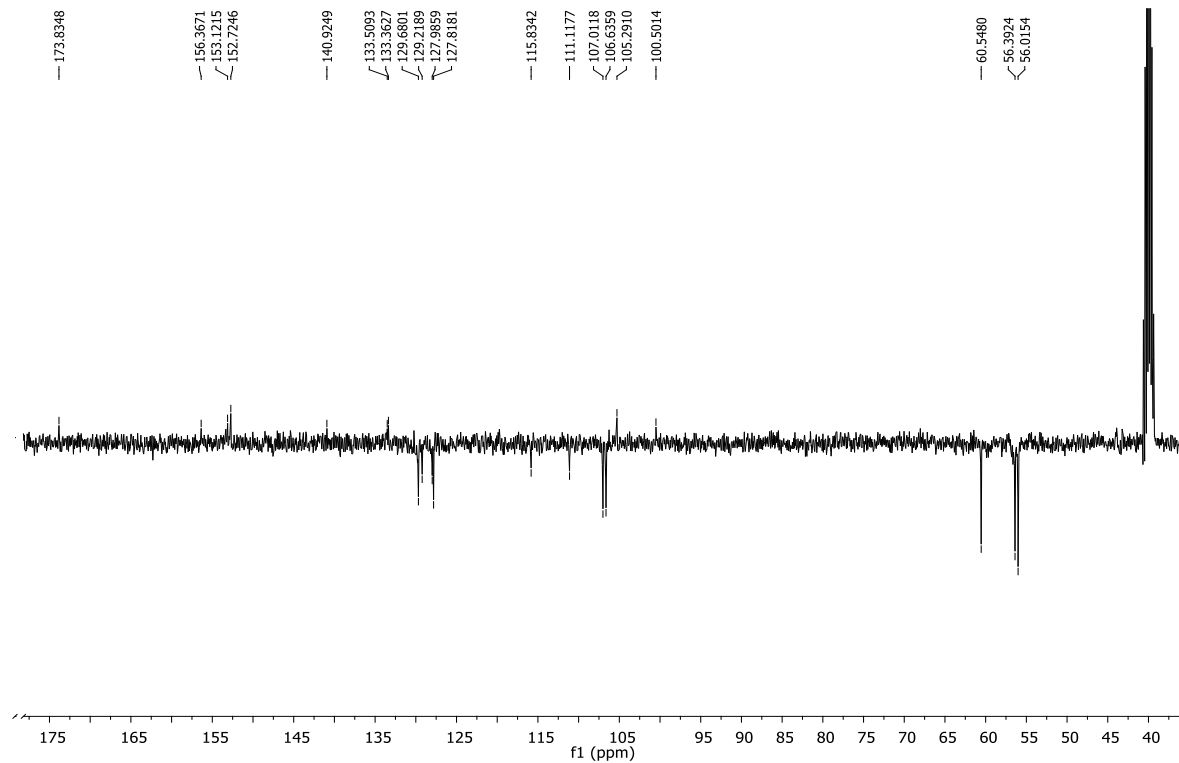

**Figure S86.**  $^{13}\text{C}$  NMR spectrum (DMSO- $d_6$ , 101 MHz) of *N*-(6-cyano-1-phenyl-1*H*-benzo[*d*]imidazol-2-yl)-3,4,5-trimethoxybenzamide **51**
